# Supplementary material
Source: publisher figshare collection journal article supplement (https://acs.figshare.com/ndownloader/files/10946741)
Supplement: Supplementary file 1 [file 10946741]

REMARK   4      COMPLIES WITH FORMAT V. 3.0, 1-DEC-2006
REMARK 888
REMARK 888 WRITTEN BY MAESTRO (A PRODUCT OF SCHRODINGER, LLC)
TITLE     H4R_homology_model
MODEL        1
ATOM      1  N   VAL A  16     -46.487   3.310  21.986  1.00  0.00           N1+
ATOM      2  CA  VAL A  16     -47.897   3.300  21.597  1.00  0.00           C  
ATOM      3  CB  VAL A  16     -48.670   2.261  22.441  1.00  0.00           C  
ATOM      4  CG1 VAL A  16     -48.678   2.579  23.946  1.00  0.00           C  
ATOM      5  CG2 VAL A  16     -50.100   2.036  21.923  1.00  0.00           C  
ATOM      6  C   VAL A  16     -48.611   4.678  21.620  1.00  0.00           C  
ATOM      7  O   VAL A  16     -49.320   4.953  20.648  1.00  0.00           O  
ATOM      8  N   THR A  17     -48.477   5.564  22.656  1.00  0.00           N  
ATOM      9  CA  THR A  17     -49.177   6.866  22.585  1.00  0.00           C  
ATOM     10  CB  THR A  17     -49.125   7.405  24.023  1.00  0.00           C  
ATOM     11  OG1 THR A  17     -47.815   7.129  24.508  1.00  0.00           O  
ATOM     12  CG2 THR A  17     -50.163   6.711  24.920  1.00  0.00           C  
ATOM     13  C   THR A  17     -48.530   7.891  21.638  1.00  0.00           C  
ATOM     14  O   THR A  17     -49.176   8.880  21.283  1.00  0.00           O  
ATOM     15  N   LEU A  18     -47.260   7.638  21.219  1.00  0.00           N  
ATOM     16  CA  LEU A  18     -46.448   8.482  20.326  1.00  0.00           C  
ATOM     17  CB  LEU A  18     -44.952   8.297  20.662  1.00  0.00           C  
ATOM     18  CG  LEU A  18     -44.273   7.007  20.143  1.00  0.00           C  
ATOM     19  CD1 LEU A  18     -42.779   7.021  20.486  1.00  0.00           C  
ATOM     20  CD2 LEU A  18     -44.928   5.720  20.660  1.00  0.00           C  
ATOM     21  C   LEU A  18     -46.696   8.231  18.823  1.00  0.00           C  
ATOM     22  O   LEU A  18     -45.872   8.603  17.983  1.00  0.00           O  
ATOM     23  N   ALA A  19     -47.844   7.619  18.488  1.00  0.00           N  
ATOM     24  CA  ALA A  19     -48.260   7.336  17.113  1.00  0.00           C  
ATOM     25  CB  ALA A  19     -49.358   6.265  17.138  1.00  0.00           C  
ATOM     26  C   ALA A  19     -48.787   8.645  16.494  1.00  0.00           C  
ATOM     27  O   ALA A  19     -48.346   9.033  15.407  1.00  0.00           O  
ATOM     28  N   PHE A  20     -49.709   9.325  17.212  1.00  0.00           N  
ATOM     29  CA  PHE A  20     -50.356  10.582  16.803  1.00  0.00           C  
ATOM     30  CB  PHE A  20     -51.773  10.591  17.404  1.00  0.00           C  
ATOM     31  CG  PHE A  20     -52.658  11.646  16.790  1.00  0.00           C  
ATOM     32  CD1 PHE A  20     -53.358  11.377  15.618  1.00  0.00           C  
ATOM     33  CD2 PHE A  20     -52.790  12.900  17.382  1.00  0.00           C  
ATOM     34  CE1 PHE A  20     -54.178  12.342  15.048  1.00  0.00           C  
ATOM     35  CE2 PHE A  20     -53.606  13.868  16.812  1.00  0.00           C  
ATOM     36  CZ  PHE A  20     -54.302  13.589  15.645  1.00  0.00           C  
ATOM     37  C   PHE A  20     -49.579  11.843  17.254  1.00  0.00           C  
ATOM     38  O   PHE A  20     -49.805  12.925  16.699  1.00  0.00           O  
ATOM     39  N   PHE A  21     -48.665  11.700  18.246  1.00  0.00           N  
ATOM     40  CA  PHE A  21     -47.820  12.782  18.780  1.00  0.00           C  
ATOM     41  CB  PHE A  21     -46.935  12.186  19.889  1.00  0.00           C  
ATOM     42  CG  PHE A  21     -45.947  13.176  20.450  1.00  0.00           C  
ATOM     43  CD1 PHE A  21     -44.600  13.108  20.101  1.00  0.00           C  
ATOM     44  CD2 PHE A  21     -46.368  14.177  21.319  1.00  0.00           C  
ATOM     45  CE1 PHE A  21     -43.690  14.026  20.609  1.00  0.00           C  
ATOM     46  CE2 PHE A  21     -45.460  15.095  21.830  1.00  0.00           C  
ATOM     47  CZ  PHE A  21     -44.120  15.021  21.476  1.00  0.00           C  
ATOM     48  C   PHE A  21     -46.912  13.328  17.668  1.00  0.00           C  
ATOM     49  O   PHE A  21     -46.855  14.542  17.469  1.00  0.00           O  
ATOM     50  N   MET A  22     -46.254  12.426  16.918  1.00  0.00           N  
ATOM     51  CA  MET A  22     -45.390  12.780  15.793  1.00  0.00           C  
ATOM     52  CB  MET A  22     -44.589  11.512  15.460  1.00  0.00           C  
ATOM     53  CG  MET A  22     -43.596  11.115  16.560  1.00  0.00           C  
ATOM     54  SD  MET A  22     -42.636   9.668  16.073  1.00  0.00           S  
ATOM     55  CE  MET A  22     -41.200   9.904  17.137  1.00  0.00           C  
ATOM     56  C   MET A  22     -46.230  13.191  14.574  1.00  0.00           C  
ATOM     57  O   MET A  22     -45.751  13.967  13.745  1.00  0.00           O  
ATOM     58  N   SER A  23     -47.478  12.674  14.473  1.00  0.00           N  
ATOM     59  CA  SER A  23     -48.420  12.975  13.386  1.00  0.00           C  
ATOM     60  CB  SER A  23     -49.553  11.941  13.379  1.00  0.00           C  
ATOM     61  OG  SER A  23     -49.084  10.604  13.259  1.00  0.00           O  
ATOM     62  C   SER A  23     -48.990  14.396  13.475  1.00  0.00           C  
ATOM     63  O   SER A  23     -49.141  15.040  12.438  1.00  0.00           O  
ATOM     64  N   LEU A  24     -49.309  14.881  14.701  1.00  0.00           N  
ATOM     65  CA  LEU A  24     -49.824  16.240  14.942  1.00  0.00           C  
ATOM     66  CB  LEU A  24     -50.251  16.315  16.417  1.00  0.00           C  
ATOM     67  CG  LEU A  24     -50.869  17.660  16.842  1.00  0.00           C  
ATOM     68  CD1 LEU A  24     -52.094  18.028  15.992  1.00  0.00           C  
ATOM     69  CD2 LEU A  24     -51.235  17.630  18.331  1.00  0.00           C  
ATOM     70  C   LEU A  24     -48.743  17.285  14.625  1.00  0.00           C  
ATOM     71  O   LEU A  24     -49.057  18.357  14.104  1.00  0.00           O  
ATOM     72  N   VAL A  25     -47.465  16.939  14.919  1.00  0.00           N  
ATOM     73  CA  VAL A  25     -46.258  17.728  14.642  1.00  0.00           C  
ATOM     74  CB  VAL A  25     -44.946  17.469  15.407  1.00  0.00           C  
ATOM     75  CG1 VAL A  25     -45.165  17.454  16.924  1.00  0.00           C  
ATOM     76  CG2 VAL A  25     -44.158  16.257  14.932  1.00  0.00           C  
ATOM     77  C   VAL A  25     -46.132  17.890  13.110  1.00  0.00           C  
ATOM     78  O   VAL A  25     -45.867  18.989  12.625  1.00  0.00           O  
ATOM     79  N   ALA A  26     -46.373  16.796  12.364  1.00  0.00           N  
ATOM     80  CA  ALA A  26     -46.367  16.743  10.902  1.00  0.00           C  
ATOM     81  CB  ALA A  26     -46.643  15.294  10.478  1.00  0.00           C  
ATOM     82  C   ALA A  26     -47.510  17.608  10.327  1.00  0.00           C  
ATOM     83  O   ALA A  26     -47.306  18.304   9.329  1.00  0.00           O  
ATOM     84  N   PHE A  27     -48.696  17.568  10.981  1.00  0.00           N  
ATOM     85  CA  PHE A  27     -49.910  18.300  10.592  1.00  0.00           C  
ATOM     86  CB  PHE A  27     -51.123  17.853  11.434  1.00  0.00           C  
ATOM     87  CG  PHE A  27     -51.543  16.407  11.272  1.00  0.00           C  
ATOM     88  CD1 PHE A  27     -51.122  15.602  10.209  1.00  0.00           C  
ATOM     89  CD2 PHE A  27     -52.392  15.847  12.224  1.00  0.00           C  
ATOM     90  CE1 PHE A  27     -51.530  14.278  10.112  1.00  0.00           C  
ATOM     91  CE2 PHE A  27     -52.801  14.524  12.128  1.00  0.00           C  
ATOM     92  CZ  PHE A  27     -52.369  13.736  11.073  1.00  0.00           C  
ATOM     93  C   PHE A  27     -49.764  19.815  10.651  1.00  0.00           C  
ATOM     94  O   PHE A  27     -50.371  20.509   9.830  1.00  0.00           O  
ATOM     95  N   ALA A  28     -48.993  20.332  11.624  1.00  0.00           N  
ATOM     96  CA  ALA A  28     -48.749  21.773  11.738  1.00  0.00           C  
ATOM     97  CB  ALA A  28     -48.209  22.047  13.143  1.00  0.00           C  
ATOM     98  C   ALA A  28     -47.742  22.245  10.685  1.00  0.00           C  
ATOM     99  O   ALA A  28     -47.967  23.273  10.050  1.00  0.00           O  
ATOM    100  N   ILE A  29     -46.680  21.444  10.446  1.00  0.00           N  
ATOM    101  CA  ILE A  29     -45.614  21.699   9.469  1.00  0.00           C  
ATOM    102  CB  ILE A  29     -44.569  20.544   9.510  1.00  0.00           C  
ATOM    103  CG2 ILE A  29     -43.436  20.678   8.466  1.00  0.00           C  
ATOM    104  CG1 ILE A  29     -43.900  20.434  10.885  1.00  0.00           C  
ATOM    105  CD1 ILE A  29     -43.165  19.108  11.111  1.00  0.00           C  
ATOM    106  C   ILE A  29     -46.134  21.826   8.028  1.00  0.00           C  
ATOM    107  O   ILE A  29     -45.573  22.605   7.254  1.00  0.00           O  
ATOM    108  N   MET A  30     -47.221  21.095   7.735  1.00  0.00           N  
ATOM    109  CA  MET A  30     -47.870  21.343   6.454  1.00  0.00           C  
ATOM    110  CB  MET A  30     -48.986  20.306   6.259  1.00  0.00           C  
ATOM    111  CG  MET A  30     -49.587  20.335   4.848  1.00  0.00           C  
ATOM    112  SD  MET A  30     -50.655  18.912   4.558  1.00  0.00           S  
ATOM    113  CE  MET A  30     -49.410  17.763   3.942  1.00  0.00           C  
ATOM    114  C   MET A  30     -48.399  22.798   6.382  1.00  0.00           C  
ATOM    115  O   MET A  30     -48.141  23.531   5.437  1.00  0.00           O  
ATOM    116  N   LEU A  31     -49.152  23.168   7.435  1.00  0.00           N  
ATOM    117  CA  LEU A  31     -49.866  24.444   7.427  1.00  0.00           C  
ATOM    118  CB  LEU A  31     -50.841  24.469   8.620  1.00  0.00           C  
ATOM    119  CG  LEU A  31     -51.626  25.788   8.789  1.00  0.00           C  
ATOM    120  CD1 LEU A  31     -52.442  26.143   7.538  1.00  0.00           C  
ATOM    121  CD2 LEU A  31     -52.532  25.721  10.024  1.00  0.00           C  
ATOM    122  C   LEU A  31     -48.902  25.644   7.492  1.00  0.00           C  
ATOM    123  O   LEU A  31     -48.953  26.556   6.681  1.00  0.00           O  
ATOM    124  N   GLY A  32     -48.045  25.609   8.524  1.00  0.00           N  
ATOM    125  CA  GLY A  32     -47.216  26.761   8.859  1.00  0.00           C  
ATOM    126  C   GLY A  32     -46.257  27.128   7.727  1.00  0.00           C  
ATOM    127  O   GLY A  32     -46.163  28.275   7.299  1.00  0.00           O  
ATOM    128  N   ASN A  33     -45.557  26.086   7.237  1.00  0.00           N  
ATOM    129  CA  ASN A  33     -44.607  26.363   6.156  1.00  0.00           C  
ATOM    130  CB  ASN A  33     -43.816  25.091   5.786  1.00  0.00           C  
ATOM    131  CG  ASN A  33     -42.696  24.833   6.792  1.00  0.00           C  
ATOM    132  OD1 ASN A  33     -41.701  25.539   6.819  1.00  0.00           O  
ATOM    133  ND2 ASN A  33     -42.919  23.817   7.628  1.00  0.00           N  
ATOM    134  C   ASN A  33     -45.335  26.844   4.899  1.00  0.00           C  
ATOM    135  O   ASN A  33     -44.777  27.632   4.136  1.00  0.00           O  
ATOM    136  N   ALA A  34     -46.583  26.374   4.694  1.00  0.00           N  
ATOM    137  CA  ALA A  34     -47.444  26.741   3.569  1.00  0.00           C  
ATOM    138  CB  ALA A  34     -48.626  25.772   3.464  1.00  0.00           C  
ATOM    139  C   ALA A  34     -47.948  28.189   3.744  1.00  0.00           C  
ATOM    140  O   ALA A  34     -48.102  28.915   2.755  1.00  0.00           O  
ATOM    141  N   LEU A  35     -48.176  28.600   5.016  1.00  0.00           N  
ATOM    142  CA  LEU A  35     -48.625  29.932   5.441  1.00  0.00           C  
ATOM    143  CB  LEU A  35     -48.880  29.933   6.960  1.00  0.00           C  
ATOM    144  CG  LEU A  35     -49.545  31.220   7.489  1.00  0.00           C  
ATOM    145  CD1 LEU A  35     -51.039  31.266   7.143  1.00  0.00           C  
ATOM    146  CD2 LEU A  35     -49.333  31.355   9.001  1.00  0.00           C  
ATOM    147  C   LEU A  35     -47.577  30.999   5.095  1.00  0.00           C  
ATOM    148  O   LEU A  35     -47.945  32.076   4.626  1.00  0.00           O  
ATOM    149  N   VAL A  36     -46.281  30.681   5.325  1.00  0.00           N  
ATOM    150  CA  VAL A  36     -45.114  31.523   5.040  1.00  0.00           C  
ATOM    151  CB  VAL A  36     -43.837  30.779   5.515  1.00  0.00           C  
ATOM    152  CG1 VAL A  36     -42.533  31.457   5.057  1.00  0.00           C  
ATOM    153  CG2 VAL A  36     -43.801  30.600   7.039  1.00  0.00           C  
ATOM    154  C   VAL A  36     -45.048  31.728   3.516  1.00  0.00           C  
ATOM    155  O   VAL A  36     -44.878  32.859   3.058  1.00  0.00           O  
ATOM    156  N   ILE A  37     -45.229  30.631   2.746  1.00  0.00           N  
ATOM    157  CA  ILE A  37     -45.220  30.612   1.281  1.00  0.00           C  
ATOM    158  CB  ILE A  37     -45.165  29.138   0.808  1.00  0.00           C  
ATOM    159  CG2 ILE A  37     -45.332  29.002  -0.717  1.00  0.00           C  
ATOM    160  CG1 ILE A  37     -43.837  28.479   1.255  1.00  0.00           C  
ATOM    161  CD1 ILE A  37     -43.824  26.948   1.142  1.00  0.00           C  
ATOM    162  C   ILE A  37     -46.365  31.427   0.668  1.00  0.00           C  
ATOM    163  O   ILE A  37     -46.177  32.028  -0.387  1.00  0.00           O  
ATOM    164  N   LEU A  38     -47.534  31.463   1.335  1.00  0.00           N  
ATOM    165  CA  LEU A  38     -48.686  32.246   0.882  1.00  0.00           C  
ATOM    166  CB  LEU A  38     -49.945  31.729   1.601  1.00  0.00           C  
ATOM    167  CG  LEU A  38     -50.418  30.352   1.100  1.00  0.00           C  
ATOM    168  CD1 LEU A  38     -51.374  29.705   2.110  1.00  0.00           C  
ATOM    169  CD2 LEU A  38     -51.079  30.448  -0.282  1.00  0.00           C  
ATOM    170  C   LEU A  38     -48.480  33.727   1.227  1.00  0.00           C  
ATOM    171  O   LEU A  38     -48.751  34.591   0.391  1.00  0.00           O  
ATOM    172  N   ALA A  39     -47.983  34.006   2.454  1.00  0.00           N  
ATOM    173  CA  ALA A  39     -47.719  35.345   2.990  1.00  0.00           C  
ATOM    174  CB  ALA A  39     -47.116  35.192   4.394  1.00  0.00           C  
ATOM    175  C   ALA A  39     -46.774  36.204   2.136  1.00  0.00           C  
ATOM    176  O   ALA A  39     -46.937  37.425   2.113  1.00  0.00           O  
ATOM    177  N   PHE A  40     -45.794  35.582   1.445  1.00  0.00           N  
ATOM    178  CA  PHE A  40     -44.827  36.285   0.587  1.00  0.00           C  
ATOM    179  CB  PHE A  40     -43.685  35.281   0.307  1.00  0.00           C  
ATOM    180  CG  PHE A  40     -42.808  35.678  -0.853  1.00  0.00           C  
ATOM    181  CD1 PHE A  40     -42.970  35.067  -2.094  1.00  0.00           C  
ATOM    182  CD2 PHE A  40     -41.844  36.669  -0.709  1.00  0.00           C  
ATOM    183  CE1 PHE A  40     -42.196  35.457  -3.178  1.00  0.00           C  
ATOM    184  CE2 PHE A  40     -41.066  37.061  -1.790  1.00  0.00           C  
ATOM    185  CZ  PHE A  40     -41.248  36.458  -3.027  1.00  0.00           C  
ATOM    186  C   PHE A  40     -45.487  36.730  -0.721  1.00  0.00           C  
ATOM    187  O   PHE A  40     -45.324  37.881  -1.120  1.00  0.00           O  
ATOM    188  N   VAL A  41     -46.244  35.832  -1.368  1.00  0.00           N  
ATOM    189  CA  VAL A  41     -46.917  36.127  -2.635  1.00  0.00           C  
ATOM    190  CB  VAL A  41     -47.288  34.815  -3.363  1.00  0.00           C  
ATOM    191  CG1 VAL A  41     -48.212  33.897  -2.552  1.00  0.00           C  
ATOM    192  CG2 VAL A  41     -47.863  35.070  -4.765  1.00  0.00           C  
ATOM    193  C   VAL A  41     -48.088  37.094  -2.470  1.00  0.00           C  
ATOM    194  O   VAL A  41     -48.335  37.895  -3.378  1.00  0.00           O  
ATOM    195  N   VAL A  42     -48.811  37.014  -1.326  1.00  0.00           N  
ATOM    196  CA  VAL A  42     -49.992  37.844  -1.022  1.00  0.00           C  
ATOM    197  CB  VAL A  42     -50.768  37.150   0.127  1.00  0.00           C  
ATOM    198  CG1 VAL A  42     -51.860  38.027   0.768  1.00  0.00           C  
ATOM    199  CG2 VAL A  42     -51.408  35.839  -0.360  1.00  0.00           C  
ATOM    200  C   VAL A  42     -49.701  39.322  -0.689  1.00  0.00           C  
ATOM    201  O   VAL A  42     -50.405  40.213  -1.185  1.00  0.00           O  
ATOM    202  N   ASP A  43     -48.674  39.576   0.145  1.00  0.00           N  
ATOM    203  CA  ASP A  43     -48.287  40.915   0.588  1.00  0.00           C  
ATOM    204  CB  ASP A  43     -47.942  40.893   2.090  1.00  0.00           C  
ATOM    205  CG  ASP A  43     -48.295  42.229   2.772  1.00  0.00           C  
ATOM    206  OD1 ASP A  43     -48.020  43.281   2.196  1.00  0.00           O  
ATOM    207  OD2 ASP A  43     -48.865  42.202   3.865  1.00  0.00           O1-
ATOM    208  C   ASP A  43     -47.176  41.530  -0.266  1.00  0.00           C  
ATOM    209  O   ASP A  43     -46.178  40.868  -0.558  1.00  0.00           O  
ATOM    210  N   LYS A  44     -47.351  42.806  -0.650  1.00  0.00           N  
ATOM    211  CA  LYS A  44     -46.354  43.560  -1.417  1.00  0.00           C  
ATOM    212  CB  LYS A  44     -47.010  44.763  -2.120  1.00  0.00           C  
ATOM    213  CG  LYS A  44     -47.612  45.827  -1.183  1.00  0.00           C  
ATOM    214  CD  LYS A  44     -48.179  47.023  -1.961  1.00  0.00           C  
ATOM    215  CE  LYS A  44     -48.672  48.144  -1.036  1.00  0.00           C  
ATOM    216  NZ  LYS A  44     -49.169  49.315  -1.765  1.00  0.00           N1+
ATOM    217  C   LYS A  44     -45.218  44.011  -0.484  1.00  0.00           C  
ATOM    218  O   LYS A  44     -44.076  44.162  -0.934  1.00  0.00           O  
ATOM    219  N   ASN A  45     -45.540  44.206   0.823  1.00  0.00           N  
ATOM    220  CA  ASN A  45     -44.630  44.626   1.900  1.00  0.00           C  
ATOM    221  CB  ASN A  45     -45.534  44.950   3.102  1.00  0.00           C  
ATOM    222  CG  ASN A  45     -44.774  45.519   4.302  1.00  0.00           C  
ATOM    223  OD1 ASN A  45     -43.886  46.347   4.177  1.00  0.00           O  
ATOM    224  ND2 ASN A  45     -45.191  45.037   5.476  1.00  0.00           N  
ATOM    225  C   ASN A  45     -43.635  43.526   2.304  1.00  0.00           C  
ATOM    226  O   ASN A  45     -42.628  43.824   2.960  1.00  0.00           O  
ATOM    227  N   LEU A  46     -43.920  42.263   1.908  1.00  0.00           N  
ATOM    228  CA  LEU A  46     -43.090  41.083   2.184  1.00  0.00           C  
ATOM    229  CB  LEU A  46     -43.999  39.967   2.760  1.00  0.00           C  
ATOM    230  CG  LEU A  46     -44.395  40.096   4.249  1.00  0.00           C  
ATOM    231  CD1 LEU A  46     -44.986  41.456   4.641  1.00  0.00           C  
ATOM    232  CD2 LEU A  46     -45.370  38.974   4.636  1.00  0.00           C  
ATOM    233  C   LEU A  46     -42.381  40.543   0.915  1.00  0.00           C  
ATOM    234  O   LEU A  46     -41.904  39.405   0.920  1.00  0.00           O  
ATOM    235  N   ARG A  47     -42.270  41.386  -0.149  1.00  0.00           N  
ATOM    236  CA  ARG A  47     -41.597  41.072  -1.421  1.00  0.00           C  
ATOM    237  CB  ARG A  47     -42.190  41.965  -2.537  1.00  0.00           C  
ATOM    238  CG  ARG A  47     -42.750  41.149  -3.690  1.00  0.00           C  
ATOM    239  CD  ARG A  47     -43.974  40.406  -3.187  1.00  0.00           C  
ATOM    240  NE  ARG A  47     -44.725  39.871  -4.303  1.00  0.00           N1+
ATOM    241  CZ  ARG A  47     -45.995  39.488  -4.099  1.00  0.00           C  
ATOM    242  NH1 ARG A  47     -46.571  39.663  -2.915  1.00  0.00           N  
ATOM    243  NH2 ARG A  47     -46.680  38.910  -5.076  1.00  0.00           N  
ATOM    244  C   ARG A  47     -40.090  41.390  -1.368  1.00  0.00           C  
ATOM    245  O   ARG A  47     -39.470  41.609  -2.413  1.00  0.00           O  
ATOM    246  N   HIS A  48     -39.507  41.387  -0.148  1.00  0.00           N  
ATOM    247  CA  HIS A  48     -38.098  41.674   0.146  1.00  0.00           C  
ATOM    248  CB  HIS A  48     -37.947  41.719   1.679  1.00  0.00           C  
ATOM    249  CG  HIS A  48     -38.384  43.064   2.229  1.00  0.00           C  
ATOM    250  CD2 HIS A  48     -37.549  44.163   2.494  1.00  0.00           C  
ATOM    251  ND1 HIS A  48     -39.652  43.411   2.566  1.00  0.00           N  
ATOM    252  CE1 HIS A  48     -39.579  44.676   3.018  1.00  0.00           C  
ATOM    253  NE2 HIS A  48     -38.323  45.154   2.986  1.00  0.00           N  
ATOM    254  C   HIS A  48     -37.158  40.642  -0.485  1.00  0.00           C  
ATOM    255  O   HIS A  48     -37.465  39.445  -0.508  1.00  0.00           O  
ATOM    256  N   ARG A  49     -36.003  41.126  -0.984  1.00  0.00           N  
ATOM    257  CA  ARG A  49     -34.934  40.324  -1.595  1.00  0.00           C  
ATOM    258  CB  ARG A  49     -33.838  41.292  -2.086  1.00  0.00           C  
ATOM    259  CG  ARG A  49     -34.366  42.360  -3.062  1.00  0.00           C  
ATOM    260  CD  ARG A  49     -34.791  41.780  -4.419  1.00  0.00           C  
ATOM    261  NE  ARG A  49     -35.668  42.710  -5.135  1.00  0.00           N1+
ATOM    262  CZ  ARG A  49     -37.002  42.740  -4.892  1.00  0.00           C  
ATOM    263  NH1 ARG A  49     -37.505  41.901  -3.998  1.00  0.00           N  
ATOM    264  NH2 ARG A  49     -37.797  43.605  -5.522  1.00  0.00           N  
ATOM    265  C   ARG A  49     -34.359  39.309  -0.589  1.00  0.00           C  
ATOM    266  O   ARG A  49     -34.181  38.138  -0.931  1.00  0.00           O  
ATOM    267  N   SER A  50     -34.157  39.753   0.650  1.00  0.00           N  
ATOM    268  CA  SER A  50     -33.679  38.916   1.747  1.00  0.00           C  
ATOM    269  CB  SER A  50     -32.972  39.742   2.835  1.00  0.00           C  
ATOM    270  OG  SER A  50     -31.888  39.006   3.398  1.00  0.00           O  
ATOM    271  C   SER A  50     -34.717  37.924   2.233  1.00  0.00           C  
ATOM    272  O   SER A  50     -34.385  37.017   2.995  1.00  0.00           O  
ATOM    273  N   SER A  51     -35.992  38.096   1.799  1.00  0.00           N  
ATOM    274  CA  SER A  51     -37.114  37.211   2.134  1.00  0.00           C  
ATOM    275  CB  SER A  51     -38.416  38.022   2.261  1.00  0.00           C  
ATOM    276  OG  SER A  51     -39.394  37.387   3.076  1.00  0.00           O  
ATOM    277  C   SER A  51     -37.264  36.038   1.146  1.00  0.00           C  
ATOM    278  O   SER A  51     -38.025  35.107   1.416  1.00  0.00           O  
ATOM    279  N   TYR A  52     -36.508  36.068   0.023  1.00  0.00           N  
ATOM    280  CA  TYR A  52     -36.469  34.990  -0.974  1.00  0.00           C  
ATOM    281  CB  TYR A  52     -35.767  35.437  -2.277  1.00  0.00           C  
ATOM    282  CG  TYR A  52     -36.660  36.228  -3.192  1.00  0.00           C  
ATOM    283  CD1 TYR A  52     -37.117  35.696  -4.394  1.00  0.00           C  
ATOM    284  CE1 TYR A  52     -37.945  36.439  -5.229  1.00  0.00           C  
ATOM    285  CD2 TYR A  52     -37.042  37.511  -2.843  1.00  0.00           C  
ATOM    286  CE2 TYR A  52     -37.878  38.255  -3.659  1.00  0.00           C  
ATOM    287  CZ  TYR A  52     -38.329  37.727  -4.857  1.00  0.00           C  
ATOM    288  OH  TYR A  52     -39.161  38.510  -5.635  1.00  0.00           O  
ATOM    289  C   TYR A  52     -35.670  33.789  -0.425  1.00  0.00           C  
ATOM    290  O   TYR A  52     -35.894  32.652  -0.849  1.00  0.00           O  
ATOM    291  N   PHE A  53     -34.749  34.063   0.523  1.00  0.00           N  
ATOM    292  CA  PHE A  53     -33.917  33.090   1.229  1.00  0.00           C  
ATOM    293  CB  PHE A  53     -32.700  33.782   1.813  1.00  0.00           C  
ATOM    294  CG  PHE A  53     -31.760  34.444   0.852  1.00  0.00           C  
ATOM    295  CD1 PHE A  53     -31.976  35.756   0.464  1.00  0.00           C  
ATOM    296  CD2 PHE A  53     -30.624  33.781   0.396  1.00  0.00           C  
ATOM    297  CE1 PHE A  53     -31.048  36.416  -0.322  1.00  0.00           C  
ATOM    298  CE2 PHE A  53     -29.702  34.431  -0.410  1.00  0.00           C  
ATOM    299  CZ  PHE A  53     -29.907  35.756  -0.756  1.00  0.00           C  
ATOM    300  C   PHE A  53     -34.746  32.445   2.334  1.00  0.00           C  
ATOM    301  O   PHE A  53     -34.427  31.341   2.778  1.00  0.00           O  
ATOM    302  N   PHE A  54     -35.806  33.139   2.783  1.00  0.00           N  
ATOM    303  CA  PHE A  54     -36.749  32.659   3.800  1.00  0.00           C  
ATOM    304  CB  PHE A  54     -37.478  33.831   4.475  1.00  0.00           C  
ATOM    305  CG  PHE A  54     -36.642  34.706   5.378  1.00  0.00           C  
ATOM    306  CD1 PHE A  54     -35.441  34.286   5.955  1.00  0.00           C  
ATOM    307  CD2 PHE A  54     -37.119  35.975   5.687  1.00  0.00           C  
ATOM    308  CE1 PHE A  54     -34.765  35.102   6.853  1.00  0.00           C  
ATOM    309  CE2 PHE A  54     -36.442  36.794   6.576  1.00  0.00           C  
ATOM    310  CZ  PHE A  54     -35.276  36.348   7.177  1.00  0.00           C  
ATOM    311  C   PHE A  54     -37.788  31.755   3.104  1.00  0.00           C  
ATOM    312  O   PHE A  54     -38.321  30.834   3.727  1.00  0.00           O  
ATOM    313  N   LEU A  55     -38.025  32.007   1.794  1.00  0.00           N  
ATOM    314  CA  LEU A  55     -38.922  31.240   0.920  1.00  0.00           C  
ATOM    315  CB  LEU A  55     -39.149  32.007  -0.394  1.00  0.00           C  
ATOM    316  CG  LEU A  55     -40.247  31.407  -1.294  1.00  0.00           C  
ATOM    317  CD1 LEU A  55     -41.641  31.491  -0.651  1.00  0.00           C  
ATOM    318  CD2 LEU A  55     -40.248  32.104  -2.660  1.00  0.00           C  
ATOM    319  C   LEU A  55     -38.331  29.838   0.688  1.00  0.00           C  
ATOM    320  O   LEU A  55     -38.997  28.847   0.992  1.00  0.00           O  
ATOM    321  N   ASN A  56     -37.077  29.769   0.183  1.00  0.00           N  
ATOM    322  CA  ASN A  56     -36.327  28.533  -0.093  1.00  0.00           C  
ATOM    323  CB  ASN A  56     -34.970  28.868  -0.713  1.00  0.00           C  
ATOM    324  CG  ASN A  56     -35.133  29.169  -2.207  1.00  0.00           C  
ATOM    325  OD1 ASN A  56     -34.885  28.322  -3.050  1.00  0.00           O  
ATOM    326  ND2 ASN A  56     -35.564  30.398  -2.507  1.00  0.00           N  
ATOM    327  C   ASN A  56     -36.212  27.632   1.149  1.00  0.00           C  
ATOM    328  O   ASN A  56     -36.289  26.408   1.022  1.00  0.00           O  
ATOM    329  N   LEU A  57     -36.056  28.240   2.341  1.00  0.00           N  
ATOM    330  CA  LEU A  57     -35.993  27.528   3.611  1.00  0.00           C  
ATOM    331  CB  LEU A  57     -35.501  28.498   4.703  1.00  0.00           C  
ATOM    332  CG  LEU A  57     -35.365  27.877   6.111  1.00  0.00           C  
ATOM    333  CD1 LEU A  57     -34.396  26.684   6.138  1.00  0.00           C  
ATOM    334  CD2 LEU A  57     -34.935  28.941   7.131  1.00  0.00           C  
ATOM    335  C   LEU A  57     -37.375  26.960   3.972  1.00  0.00           C  
ATOM    336  O   LEU A  57     -37.448  25.854   4.506  1.00  0.00           O  
ATOM    337  N   ALA A  58     -38.463  27.697   3.664  1.00  0.00           N  
ATOM    338  CA  ALA A  58     -39.825  27.223   3.916  1.00  0.00           C  
ATOM    339  CB  ALA A  58     -40.785  28.415   3.828  1.00  0.00           C  
ATOM    340  C   ALA A  58     -40.270  26.126   2.909  1.00  0.00           C  
ATOM    341  O   ALA A  58     -41.169  25.341   3.224  1.00  0.00           O  
ATOM    342  N   ILE A  59     -39.618  26.069   1.714  1.00  0.00           N  
ATOM    343  CA  ILE A  59     -39.840  25.065   0.656  1.00  0.00           C  
ATOM    344  CB  ILE A  59     -39.273  25.580  -0.687  1.00  0.00           C  
ATOM    345  CG2 ILE A  59     -39.162  24.460  -1.739  1.00  0.00           C  
ATOM    346  CG1 ILE A  59     -40.162  26.731  -1.209  1.00  0.00           C  
ATOM    347  CD1 ILE A  59     -39.577  27.501  -2.399  1.00  0.00           C  
ATOM    348  C   ILE A  59     -39.223  23.749   1.155  1.00  0.00           C  
ATOM    349  O   ILE A  59     -39.931  22.742   1.266  1.00  0.00           O  
ATOM    350  N   SER A  60     -37.909  23.780   1.488  1.00  0.00           N  
ATOM    351  CA  SER A  60     -37.162  22.648   2.026  1.00  0.00           C  
ATOM    352  CB  SER A  60     -35.748  23.095   2.445  1.00  0.00           C  
ATOM    353  OG  SER A  60     -35.604  23.756   3.696  1.00  0.00           O  
ATOM    354  C   SER A  60     -37.875  22.105   3.258  1.00  0.00           C  
ATOM    355  O   SER A  60     -38.029  20.897   3.374  1.00  0.00           O  
ATOM    356  N   ASP A  61     -38.387  22.998   4.126  1.00  0.00           N  
ATOM    357  CA  ASP A  61     -39.123  22.596   5.319  1.00  0.00           C  
ATOM    358  CB  ASP A  61     -39.117  23.761   6.341  1.00  0.00           C  
ATOM    359  CG  ASP A  61     -37.755  24.049   7.028  1.00  0.00           C  
ATOM    360  OD1 ASP A  61     -36.780  23.333   6.798  1.00  0.00           O  
ATOM    361  OD2 ASP A  61     -37.687  24.991   7.822  1.00  0.00           O1-
ATOM    362  C   ASP A  61     -40.571  22.134   5.044  1.00  0.00           C  
ATOM    363  O   ASP A  61     -41.181  21.520   5.923  1.00  0.00           O  
ATOM    364  N   PHE A  62     -41.117  22.398   3.834  1.00  0.00           N  
ATOM    365  CA  PHE A  62     -42.459  21.900   3.494  1.00  0.00           C  
ATOM    366  CB  PHE A  62     -43.090  22.830   2.445  1.00  0.00           C  
ATOM    367  CG  PHE A  62     -44.486  22.401   2.077  1.00  0.00           C  
ATOM    368  CD1 PHE A  62     -44.735  21.782   0.856  1.00  0.00           C  
ATOM    369  CD2 PHE A  62     -45.544  22.608   2.957  1.00  0.00           C  
ATOM    370  CE1 PHE A  62     -46.019  21.370   0.522  1.00  0.00           C  
ATOM    371  CE2 PHE A  62     -46.828  22.198   2.625  1.00  0.00           C  
ATOM    372  CZ  PHE A  62     -47.067  21.575   1.408  1.00  0.00           C  
ATOM    373  C   PHE A  62     -42.331  20.466   2.987  1.00  0.00           C  
ATOM    374  O   PHE A  62     -43.100  19.603   3.426  1.00  0.00           O  
ATOM    375  N   PHE A  63     -41.338  20.205   2.085  1.00  0.00           N  
ATOM    376  CA  PHE A  63     -41.032  18.867   1.559  1.00  0.00           C  
ATOM    377  CB  PHE A  63     -39.719  18.957   0.799  1.00  0.00           C  
ATOM    378  CG  PHE A  63     -39.922  19.190  -0.675  1.00  0.00           C  
ATOM    379  CD1 PHE A  63     -39.887  20.470  -1.217  1.00  0.00           C  
ATOM    380  CD2 PHE A  63     -40.143  18.109  -1.520  1.00  0.00           C  
ATOM    381  CE1 PHE A  63     -40.074  20.667  -2.579  1.00  0.00           C  
ATOM    382  CE2 PHE A  63     -40.330  18.299  -2.883  1.00  0.00           C  
ATOM    383  CZ  PHE A  63     -40.298  19.581  -3.414  1.00  0.00           C  
ATOM    384  C   PHE A  63     -40.898  17.907   2.753  1.00  0.00           C  
ATOM    385  O   PHE A  63     -41.535  16.861   2.752  1.00  0.00           O  
ATOM    386  N   VAL A  64     -40.185  18.341   3.815  1.00  0.00           N  
ATOM    387  CA  VAL A  64     -39.996  17.607   5.067  1.00  0.00           C  
ATOM    388  CB  VAL A  64     -39.067  18.441   5.975  1.00  0.00           C  
ATOM    389  CG1 VAL A  64     -39.052  17.942   7.425  1.00  0.00           C  
ATOM    390  CG2 VAL A  64     -37.635  18.461   5.417  1.00  0.00           C  
ATOM    391  C   VAL A  64     -41.342  17.292   5.750  1.00  0.00           C  
ATOM    392  O   VAL A  64     -41.516  16.191   6.256  1.00  0.00           O  
ATOM    393  N   GLY A  65     -42.286  18.227   5.710  1.00  0.00           N  
ATOM    394  CA  GLY A  65     -43.600  18.045   6.317  1.00  0.00           C  
ATOM    395  C   GLY A  65     -44.550  17.125   5.567  1.00  0.00           C  
ATOM    396  O   GLY A  65     -45.252  16.326   6.188  1.00  0.00           O  
ATOM    397  N   VAL A  66     -44.598  17.256   4.228  1.00  0.00           N  
ATOM    398  CA  VAL A  66     -45.502  16.507   3.349  1.00  0.00           C  
ATOM    399  CB  VAL A  66     -46.007  17.435   2.218  1.00  0.00           C  
ATOM    400  CG1 VAL A  66     -44.875  18.116   1.431  1.00  0.00           C  
ATOM    401  CG2 VAL A  66     -47.001  16.739   1.273  1.00  0.00           C  
ATOM    402  C   VAL A  66     -44.963  15.173   2.808  1.00  0.00           C  
ATOM    403  O   VAL A  66     -45.757  14.273   2.513  1.00  0.00           O  
ATOM    404  N   ILE A  67     -43.644  15.030   2.716  1.00  0.00           N  
ATOM    405  CA  ILE A  67     -43.063  13.811   2.148  1.00  0.00           C  
ATOM    406  CB  ILE A  67     -42.279  14.118   0.847  1.00  0.00           C  
ATOM    407  CG2 ILE A  67     -41.754  12.821   0.189  1.00  0.00           C  
ATOM    408  CG1 ILE A  67     -43.150  14.921  -0.143  1.00  0.00           C  
ATOM    409  CD1 ILE A  67     -42.531  15.101  -1.534  1.00  0.00           C  
ATOM    410  C   ILE A  67     -42.212  12.980   3.115  1.00  0.00           C  
ATOM    411  O   ILE A  67     -42.338  11.757   3.165  1.00  0.00           O  
ATOM    412  N   SER A  68     -41.340  13.646   3.867  1.00  0.00           N  
ATOM    413  CA  SER A  68     -40.354  12.965   4.699  1.00  0.00           C  
ATOM    414  CB  SER A  68     -39.143  13.835   5.025  1.00  0.00           C  
ATOM    415  OG  SER A  68     -38.219  12.942   5.616  1.00  0.00           O  
ATOM    416  C   SER A  68     -41.097  12.567   5.973  1.00  0.00           C  
ATOM    417  O   SER A  68     -40.963  11.440   6.453  1.00  0.00           O  
ATOM    418  N   ILE A  69     -41.874  13.495   6.520  1.00  0.00           N  
ATOM    419  CA  ILE A  69     -42.577  13.258   7.788  1.00  0.00           C  
ATOM    420  CB  ILE A  69     -42.861  14.571   8.541  1.00  0.00           C  
ATOM    421  CG2 ILE A  69     -43.765  14.336   9.750  1.00  0.00           C  
ATOM    422  CG1 ILE A  69     -41.528  15.189   9.031  1.00  0.00           C  
ATOM    423  CD1 ILE A  69     -41.682  16.588   9.629  1.00  0.00           C  
ATOM    424  C   ILE A  69     -43.678  12.178   7.741  1.00  0.00           C  
ATOM    425  O   ILE A  69     -43.629  11.307   8.614  1.00  0.00           O  
ATOM    426  N   PRO A  70     -44.662  12.176   6.779  1.00  0.00           N  
ATOM    427  CD  PRO A  70     -44.878  13.193   5.767  1.00  0.00           C  
ATOM    428  CA  PRO A  70     -45.697  11.117   6.789  1.00  0.00           C  
ATOM    429  CB  PRO A  70     -46.672  11.571   5.688  1.00  0.00           C  
ATOM    430  CG  PRO A  70     -46.378  13.064   5.495  1.00  0.00           C  
ATOM    431  C   PRO A  70     -45.162   9.709   6.518  1.00  0.00           C  
ATOM    432  O   PRO A  70     -45.633   8.758   7.138  1.00  0.00           O  
ATOM    433  N   LEU A  71     -44.159   9.585   5.618  1.00  0.00           N  
ATOM    434  CA  LEU A  71     -43.512   8.322   5.251  1.00  0.00           C  
ATOM    435  CB  LEU A  71     -42.719   8.543   3.953  1.00  0.00           C  
ATOM    436  CG  LEU A  71     -43.593   8.511   2.674  1.00  0.00           C  
ATOM    437  CD1 LEU A  71     -44.766   9.504   2.688  1.00  0.00           C  
ATOM    438  CD2 LEU A  71     -42.747   8.713   1.411  1.00  0.00           C  
ATOM    439  C   LEU A  71     -42.659   7.744   6.399  1.00  0.00           C  
ATOM    440  O   LEU A  71     -42.441   6.533   6.439  1.00  0.00           O  
ATOM    441  N   TYR A  72     -42.182   8.600   7.320  1.00  0.00           N  
ATOM    442  CA  TYR A  72     -41.398   8.155   8.472  1.00  0.00           C  
ATOM    443  CB  TYR A  72     -40.301   9.098   8.950  1.00  0.00           C  
ATOM    444  CG  TYR A  72     -39.116   8.230   9.258  1.00  0.00           C  
ATOM    445  CD1 TYR A  72     -38.597   7.450   8.225  1.00  0.00           C  
ATOM    446  CE1 TYR A  72     -37.511   6.618   8.450  1.00  0.00           C  
ATOM    447  CD2 TYR A  72     -38.552   8.159  10.535  1.00  0.00           C  
ATOM    448  CE2 TYR A  72     -37.458   7.327  10.774  1.00  0.00           C  
ATOM    449  CZ  TYR A  72     -36.943   6.566   9.721  1.00  0.00           C  
ATOM    450  OH  TYR A  72     -35.857   5.747   9.916  1.00  0.00           O  
ATOM    451  C   TYR A  72     -42.306   7.645   9.606  1.00  0.00           C  
ATOM    452  O   TYR A  72     -41.842   6.860  10.435  1.00  0.00           O  
ATOM    453  N   ILE A  73     -43.550   8.157   9.646  1.00  0.00           N  
ATOM    454  CA  ILE A  73     -44.484   7.813  10.719  1.00  0.00           C  
ATOM    455  CB  ILE A  73     -45.762   8.685  10.646  1.00  0.00           C  
ATOM    456  CG2 ILE A  73     -46.925   8.119  11.483  1.00  0.00           C  
ATOM    457  CG1 ILE A  73     -45.421  10.118  11.104  1.00  0.00           C  
ATOM    458  CD1 ILE A  73     -46.525  11.144  10.839  1.00  0.00           C  
ATOM    459  C   ILE A  73     -44.707   6.278  10.844  1.00  0.00           C  
ATOM    460  O   ILE A  73     -44.567   5.726  11.931  1.00  0.00           O  
ATOM    461  N   PRO A  74     -45.006   5.577   9.710  1.00  0.00           N  
ATOM    462  CD  PRO A  74     -45.376   6.161   8.420  1.00  0.00           C  
ATOM    463  CA  PRO A  74     -45.081   4.111   9.703  1.00  0.00           C  
ATOM    464  CB  PRO A  74     -45.146   3.781   8.202  1.00  0.00           C  
ATOM    465  CG  PRO A  74     -45.837   4.982   7.569  1.00  0.00           C  
ATOM    466  C   PRO A  74     -43.927   3.300  10.331  1.00  0.00           C  
ATOM    467  O   PRO A  74     -44.022   2.093  10.489  1.00  0.00           O  
ATOM    468  N   HIS A  75     -42.749   3.920  10.698  1.00  0.00           N  
ATOM    469  CA  HIS A  75     -41.687   3.134  11.350  1.00  0.00           C  
ATOM    470  CB  HIS A  75     -40.348   3.588  10.753  1.00  0.00           C  
ATOM    471  CG  HIS A  75     -40.467   3.291   9.270  1.00  0.00           C  
ATOM    472  CD2 HIS A  75     -40.114   2.103   8.607  1.00  0.00           C  
ATOM    473  ND1 HIS A  75     -41.065   4.112   8.374  1.00  0.00           N  
ATOM    474  CE1 HIS A  75     -41.087   3.437   7.216  1.00  0.00           C  
ATOM    475  NE2 HIS A  75     -40.517   2.222   7.323  1.00  0.00           N  
ATOM    476  C   HIS A  75     -41.823   3.150  12.850  1.00  0.00           C  
ATOM    477  O   HIS A  75     -40.893   2.851  13.605  1.00  0.00           O  
ATOM    478  N   THR A  76     -43.057   3.484  13.375  1.00  0.00           N  
ATOM    479  CA  THR A  76     -43.439   3.121  14.753  1.00  0.00           C  
ATOM    480  CB  THR A  76     -44.646   3.967  15.228  1.00  0.00           C  
ATOM    481  OG1 THR A  76     -44.966   3.702  16.584  1.00  0.00           O  
ATOM    482  CG2 THR A  76     -45.908   3.848  14.353  1.00  0.00           C  
ATOM    483  C   THR A  76     -43.714   1.638  14.884  1.00  0.00           C  
ATOM    484  O   THR A  76     -43.293   0.991  15.849  1.00  0.00           O  
ATOM    485  N   LEU A  77     -44.454   1.000  13.905  1.00  0.00           N  
ATOM    486  CA  LEU A  77     -44.662  -0.463  13.946  1.00  0.00           C  
ATOM    487  CB  LEU A  77     -46.151  -0.826  14.091  1.00  0.00           C  
ATOM    488  CG  LEU A  77     -46.854  -0.188  15.303  1.00  0.00           C  
ATOM    489  CD1 LEU A  77     -48.368  -0.415  15.222  1.00  0.00           C  
ATOM    490  CD2 LEU A  77     -46.298  -0.711  16.635  1.00  0.00           C  
ATOM    491  C   LEU A  77     -44.032  -1.139  12.756  1.00  0.00           C  
ATOM    492  O   LEU A  77     -44.219  -2.337  12.509  1.00  0.00           O  
ATOM    493  N   PHE A  78     -43.224  -0.352  11.954  1.00  0.00           N  
ATOM    494  CA  PHE A  78     -42.503  -0.818  10.739  1.00  0.00           C  
ATOM    495  CB  PHE A  78     -41.437  -1.868  11.104  1.00  0.00           C  
ATOM    496  CG  PHE A  78     -40.288  -1.209  11.828  1.00  0.00           C  
ATOM    497  CD1 PHE A  78     -39.145  -0.829  11.129  1.00  0.00           C  
ATOM    498  CD2 PHE A  78     -40.360  -0.943  13.193  1.00  0.00           C  
ATOM    499  CE1 PHE A  78     -38.103  -0.175  11.775  1.00  0.00           C  
ATOM    500  CE2 PHE A  78     -39.320  -0.289  13.841  1.00  0.00           C  
ATOM    501  CZ  PHE A  78     -38.193   0.100  13.131  1.00  0.00           C  
ATOM    502  C   PHE A  78     -43.450  -1.255   9.654  1.00  0.00           C  
ATOM    503  O   PHE A  78     -43.307  -2.270   8.960  1.00  0.00           O  
ATOM    504  N   GLU A  79     -44.517  -0.405   9.462  1.00  0.00           N  
ATOM    505  CA  GLU A  79     -45.612  -0.632   8.540  1.00  0.00           C  
ATOM    506  CB  GLU A  79     -46.794   0.200   9.095  1.00  0.00           C  
ATOM    507  CG  GLU A  79     -47.172  -0.117  10.561  1.00  0.00           C  
ATOM    508  CD  GLU A  79     -47.416   1.159  11.403  1.00  0.00           C  
ATOM    509  OE1 GLU A  79     -46.448   1.745  11.894  1.00  0.00           O  
ATOM    510  OE2 GLU A  79     -48.570   1.543  11.584  1.00  0.00           O1-
ATOM    511  C   GLU A  79     -45.220  -0.122   7.134  1.00  0.00           C  
ATOM    512  O   GLU A  79     -45.833   0.795   6.601  1.00  0.00           O  
ATOM    513  N   TRP A  80     -44.155  -0.735   6.567  1.00  0.00           N  
ATOM    514  CA  TRP A  80     -43.699  -0.260   5.258  1.00  0.00           C  
ATOM    515  CB  TRP A  80     -42.219  -0.550   4.951  1.00  0.00           C  
ATOM    516  CG  TRP A  80     -41.840  -2.016   4.890  1.00  0.00           C  
ATOM    517  CD2 TRP A  80     -40.738  -2.642   5.583  1.00  0.00           C  
ATOM    518  CE2 TRP A  80     -40.708  -3.993   5.171  1.00  0.00           C  
ATOM    519  CE3 TRP A  80     -39.803  -2.180   6.473  1.00  0.00           C  
ATOM    520  CD1 TRP A  80     -42.426  -3.013   4.099  1.00  0.00           C  
ATOM    521  NE1 TRP A  80     -41.747  -4.174   4.271  1.00  0.00           N  
ATOM    522  CZ2 TRP A  80     -39.749  -4.839   5.655  1.00  0.00           C  
ATOM    523  CZ3 TRP A  80     -38.822  -3.040   6.970  1.00  0.00           C  
ATOM    524  CH2 TRP A  80     -38.795  -4.373   6.559  1.00  0.00           C  
ATOM    525  C   TRP A  80     -44.721  -0.598   4.153  1.00  0.00           C  
ATOM    526  O   TRP A  80     -45.454  -1.577   4.215  1.00  0.00           O  
ATOM    527  N   ASP A  81     -44.705   0.308   3.156  1.00  0.00           N  
ATOM    528  CA  ASP A  81     -45.692   0.320   2.077  1.00  0.00           C  
ATOM    529  CB  ASP A  81     -46.645   1.476   2.473  1.00  0.00           C  
ATOM    530  CG  ASP A  81     -47.512   2.061   1.343  1.00  0.00           C  
ATOM    531  OD1 ASP A  81     -48.605   1.552   1.104  1.00  0.00           O  
ATOM    532  OD2 ASP A  81     -47.081   3.042   0.735  1.00  0.00           O1-
ATOM    533  C   ASP A  81     -45.001   0.593   0.716  1.00  0.00           C  
ATOM    534  O   ASP A  81     -45.573   0.421  -0.351  1.00  0.00           O  
ATOM    535  N   PHE A  82     -43.735   1.122   0.759  1.00  0.00           N  
ATOM    536  CA  PHE A  82     -43.175   1.869  -0.383  1.00  0.00           C  
ATOM    537  CB  PHE A  82     -42.089   2.820   0.166  1.00  0.00           C  
ATOM    538  CG  PHE A  82     -42.521   3.624   1.370  1.00  0.00           C  
ATOM    539  CD1 PHE A  82     -43.847   4.017   1.557  1.00  0.00           C  
ATOM    540  CD2 PHE A  82     -41.581   3.972   2.338  1.00  0.00           C  
ATOM    541  CE1 PHE A  82     -44.230   4.700   2.700  1.00  0.00           C  
ATOM    542  CE2 PHE A  82     -41.960   4.671   3.476  1.00  0.00           C  
ATOM    543  CZ  PHE A  82     -43.288   5.020   3.664  1.00  0.00           C  
ATOM    544  C   PHE A  82     -42.638   0.977  -1.464  1.00  0.00           C  
ATOM    545  O   PHE A  82     -43.188   0.871  -2.566  1.00  0.00           O  
ATOM    546  N   GLY A  83     -41.476   0.284  -1.211  1.00  0.00           N  
ATOM    547  CA  GLY A  83     -40.802  -0.447  -2.297  1.00  0.00           C  
ATOM    548  C   GLY A  83     -39.835   0.482  -2.970  1.00  0.00           C  
ATOM    549  O   GLY A  83     -39.760   1.678  -2.663  1.00  0.00           O  
ATOM    550  N   LYS A  84     -39.023  -0.074  -3.940  1.00  0.00           N  
ATOM    551  CA  LYS A  84     -37.870   0.623  -4.569  1.00  0.00           C  
ATOM    552  CB  LYS A  84     -37.138  -0.350  -5.515  1.00  0.00           C  
ATOM    553  CG  LYS A  84     -36.213  -1.345  -4.765  1.00  0.00           C  
ATOM    554  CD  LYS A  84     -36.927  -2.362  -3.848  1.00  0.00           C  
ATOM    555  CE  LYS A  84     -35.988  -3.150  -2.923  1.00  0.00           C  
ATOM    556  NZ  LYS A  84     -35.202  -4.194  -3.575  1.00  0.00           N1+
ATOM    557  C   LYS A  84     -38.229   1.963  -5.144  1.00  0.00           C  
ATOM    558  O   LYS A  84     -37.790   3.003  -4.643  1.00  0.00           O  
ATOM    559  N   GLU A  85     -39.107   1.994  -6.209  1.00  0.00           N  
ATOM    560  CA  GLU A  85     -39.562   3.214  -6.927  1.00  0.00           C  
ATOM    561  CB  GLU A  85     -40.644   2.785  -7.938  1.00  0.00           C  
ATOM    562  CG  GLU A  85     -40.226   1.605  -8.846  1.00  0.00           C  
ATOM    563  CD  GLU A  85     -40.642   0.232  -8.281  1.00  0.00           C  
ATOM    564  OE1 GLU A  85     -39.811  -0.441  -7.669  1.00  0.00           O  
ATOM    565  OE2 GLU A  85     -41.796  -0.146  -8.456  1.00  0.00           O1-
ATOM    566  C   GLU A  85     -40.099   4.324  -6.046  1.00  0.00           C  
ATOM    567  O   GLU A  85     -40.201   5.482  -6.469  1.00  0.00           O  
ATOM    568  N   ILE A  86     -40.495   4.044  -4.754  1.00  0.00           N  
ATOM    569  CA  ILE A  86     -41.043   5.106  -3.887  1.00  0.00           C  
ATOM    570  CB  ILE A  86     -42.354   4.586  -3.248  1.00  0.00           C  
ATOM    571  CG2 ILE A  86     -42.915   5.553  -2.187  1.00  0.00           C  
ATOM    572  CG1 ILE A  86     -43.405   4.292  -4.339  1.00  0.00           C  
ATOM    573  CD1 ILE A  86     -44.726   3.727  -3.800  1.00  0.00           C  
ATOM    574  C   ILE A  86     -40.011   5.489  -2.861  1.00  0.00           C  
ATOM    575  O   ILE A  86     -39.688   6.659  -2.621  1.00  0.00           O  
ATOM    576  N   CYS A  87     -39.418   4.458  -2.170  1.00  0.00           N  
ATOM    577  CA  CYS A  87     -38.505   4.739  -1.054  1.00  0.00           C  
ATOM    578  CB  CYS A  87     -38.381   3.551  -0.100  1.00  0.00           C  
ATOM    579  SG  CYS A  87     -37.533   4.021   1.435  1.00  0.00           S  
ATOM    580  C   CYS A  87     -37.131   5.182  -1.492  1.00  0.00           C  
ATOM    581  O   CYS A  87     -36.424   5.834  -0.713  1.00  0.00           O  
ATOM    582  N   VAL A  88     -36.678   4.918  -2.779  1.00  0.00           N  
ATOM    583  CA  VAL A  88     -35.454   5.580  -3.249  1.00  0.00           C  
ATOM    584  CB  VAL A  88     -34.996   5.045  -4.621  1.00  0.00           C  
ATOM    585  CG1 VAL A  88     -34.632   3.555  -4.541  1.00  0.00           C  
ATOM    586  CG2 VAL A  88     -35.990   5.341  -5.759  1.00  0.00           C  
ATOM    587  C   VAL A  88     -35.633   7.111  -3.288  1.00  0.00           C  
ATOM    588  O   VAL A  88     -34.661   7.840  -3.065  1.00  0.00           O  
ATOM    589  N   PHE A  89     -36.875   7.591  -3.557  1.00  0.00           N  
ATOM    590  CA  PHE A  89     -37.209   9.021  -3.602  1.00  0.00           C  
ATOM    591  CB  PHE A  89     -38.533   9.222  -4.356  1.00  0.00           C  
ATOM    592  CG  PHE A  89     -38.849  10.682  -4.561  1.00  0.00           C  
ATOM    593  CD1 PHE A  89     -38.140  11.431  -5.495  1.00  0.00           C  
ATOM    594  CD2 PHE A  89     -39.845  11.304  -3.814  1.00  0.00           C  
ATOM    595  CE1 PHE A  89     -38.422  12.779  -5.682  1.00  0.00           C  
ATOM    596  CE2 PHE A  89     -40.129  12.651  -3.999  1.00  0.00           C  
ATOM    597  CZ  PHE A  89     -39.419  13.390  -4.935  1.00  0.00           C  
ATOM    598  C   PHE A  89     -37.285   9.618  -2.204  1.00  0.00           C  
ATOM    599  O   PHE A  89     -36.899  10.768  -2.024  1.00  0.00           O  
ATOM    600  N   TRP A  90     -37.750   8.830  -1.214  1.00  0.00           N  
ATOM    601  CA  TRP A  90     -37.800   9.230   0.191  1.00  0.00           C  
ATOM    602  CB  TRP A  90     -38.610   8.245   1.063  1.00  0.00           C  
ATOM    603  CG  TRP A  90     -38.671   8.722   2.501  1.00  0.00           C  
ATOM    604  CD2 TRP A  90     -37.713   8.498   3.548  1.00  0.00           C  
ATOM    605  CE2 TRP A  90     -38.101   9.234   4.665  1.00  0.00           C  
ATOM    606  CE3 TRP A  90     -36.500   7.775   3.601  1.00  0.00           C  
ATOM    607  CD1 TRP A  90     -39.635   9.531   3.031  1.00  0.00           C  
ATOM    608  NE1 TRP A  90     -39.342   9.848   4.382  1.00  0.00           N  
ATOM    609  CZ2 TRP A  90     -37.321   9.346   5.829  1.00  0.00           C  
ATOM    610  CZ3 TRP A  90     -35.720   7.863   4.744  1.00  0.00           C  
ATOM    611  CH2 TRP A  90     -36.124   8.651   5.851  1.00  0.00           C  
ATOM    612  C   TRP A  90     -36.370   9.355   0.735  1.00  0.00           C  
ATOM    613  O   TRP A  90     -36.114  10.217   1.572  1.00  0.00           O  
ATOM    614  N   LEU A  91     -35.443   8.502   0.242  1.00  0.00           N  
ATOM    615  CA  LEU A  91     -34.018   8.529   0.598  1.00  0.00           C  
ATOM    616  CB  LEU A  91     -33.319   7.238   0.137  1.00  0.00           C  
ATOM    617  CG  LEU A  91     -33.698   5.998   0.977  1.00  0.00           C  
ATOM    618  CD1 LEU A  91     -33.282   4.699   0.273  1.00  0.00           C  
ATOM    619  CD2 LEU A  91     -33.080   6.040   2.385  1.00  0.00           C  
ATOM    620  C   LEU A  91     -33.374   9.795   0.027  1.00  0.00           C  
ATOM    621  O   LEU A  91     -32.436  10.322   0.624  1.00  0.00           O  
ATOM    622  N   THR A  92     -33.871  10.264  -1.140  1.00  0.00           N  
ATOM    623  CA  THR A  92     -33.395  11.477  -1.799  1.00  0.00           C  
ATOM    624  CB  THR A  92     -33.656  11.498  -3.317  1.00  0.00           C  
ATOM    625  OG1 THR A  92     -34.989  11.225  -3.688  1.00  0.00           O  
ATOM    626  CG2 THR A  92     -32.793  10.470  -4.053  1.00  0.00           C  
ATOM    627  C   THR A  92     -33.965  12.720  -1.110  1.00  0.00           C  
ATOM    628  O   THR A  92     -33.187  13.554  -0.651  1.00  0.00           O  
ATOM    629  N   THR A  93     -35.313  12.807  -0.981  1.00  0.00           N  
ATOM    630  CA  THR A  93     -36.039  13.930  -0.367  1.00  0.00           C  
ATOM    631  CB  THR A  93     -37.547  13.609  -0.481  1.00  0.00           C  
ATOM    632  OG1 THR A  93     -37.864  13.198  -1.793  1.00  0.00           O  
ATOM    633  CG2 THR A  93     -38.498  14.752  -0.089  1.00  0.00           C  
ATOM    634  C   THR A  93     -35.686  14.241   1.084  1.00  0.00           C  
ATOM    635  O   THR A  93     -35.914  15.361   1.525  1.00  0.00           O  
ATOM    636  N   ASP A  94     -35.113  13.275   1.815  1.00  0.00           N  
ATOM    637  CA  ASP A  94     -34.666  13.477   3.190  1.00  0.00           C  
ATOM    638  CB  ASP A  94     -34.851  12.327   4.170  1.00  0.00           C  
ATOM    639  CG  ASP A  94     -35.070  12.897   5.547  1.00  0.00           C  
ATOM    640  OD1 ASP A  94     -35.687  14.001   5.708  1.00  0.00           O  
ATOM    641  OD2 ASP A  94     -34.635  12.228   6.521  1.00  0.00           O1-
ATOM    642  C   ASP A  94     -33.281  14.134   3.155  1.00  0.00           C  
ATOM    643  O   ASP A  94     -33.040  15.096   3.884  1.00  0.00           O  
ATOM    644  N   TYR A  95     -32.415  13.631   2.263  1.00  0.00           N  
ATOM    645  CA  TYR A  95     -31.094  14.241   2.194  1.00  0.00           C  
ATOM    646  CB  TYR A  95     -30.068  13.294   1.555  1.00  0.00           C  
ATOM    647  CG  TYR A  95     -28.826  13.164   2.405  1.00  0.00           C  
ATOM    648  CD1 TYR A  95     -27.605  12.857   1.798  1.00  0.00           C  
ATOM    649  CE1 TYR A  95     -26.450  12.702   2.564  1.00  0.00           C  
ATOM    650  CD2 TYR A  95     -28.884  13.312   3.795  1.00  0.00           C  
ATOM    651  CE2 TYR A  95     -27.735  13.160   4.572  1.00  0.00           C  
ATOM    652  CZ  TYR A  95     -26.523  12.855   3.949  1.00  0.00           C  
ATOM    653  OH  TYR A  95     -25.383  12.702   4.708  1.00  0.00           O  
ATOM    654  C   TYR A  95     -31.148  15.620   1.482  1.00  0.00           C  
ATOM    655  O   TYR A  95     -30.673  16.622   2.001  1.00  0.00           O  
ATOM    656  N   LEU A  96     -31.798  15.637   0.300  1.00  0.00           N  
ATOM    657  CA  LEU A  96     -31.843  16.853  -0.526  1.00  0.00           C  
ATOM    658  CB  LEU A  96     -32.703  16.483  -1.752  1.00  0.00           C  
ATOM    659  CG  LEU A  96     -32.581  17.411  -2.973  1.00  0.00           C  
ATOM    660  CD1 LEU A  96     -33.126  16.702  -4.223  1.00  0.00           C  
ATOM    661  CD2 LEU A  96     -33.278  18.764  -2.806  1.00  0.00           C  
ATOM    662  C   LEU A  96     -32.427  18.048   0.265  1.00  0.00           C  
ATOM    663  O   LEU A  96     -31.787  19.100   0.304  1.00  0.00           O  
ATOM    664  N   LEU A  97     -33.608  17.877   0.907  1.00  0.00           N  
ATOM    665  CA  LEU A  97     -34.284  18.926   1.691  1.00  0.00           C  
ATOM    666  CB  LEU A  97     -35.802  18.856   1.702  1.00  0.00           C  
ATOM    667  CG  LEU A  97     -36.397  19.039   0.276  1.00  0.00           C  
ATOM    668  CD1 LEU A  97     -35.795  20.153  -0.602  1.00  0.00           C  
ATOM    669  CD2 LEU A  97     -36.505  17.725  -0.497  1.00  0.00           C  
ATOM    670  C   LEU A  97     -33.495  19.408   2.897  1.00  0.00           C  
ATOM    671  O   LEU A  97     -33.498  20.610   3.164  1.00  0.00           O  
ATOM    672  N   CYS A  98     -32.842  18.484   3.635  1.00  0.00           N  
ATOM    673  CA  CYS A  98     -32.027  18.832   4.801  1.00  0.00           C  
ATOM    674  CB  CYS A  98     -31.661  17.596   5.634  1.00  0.00           C  
ATOM    675  SG  CYS A  98     -33.131  16.853   6.402  1.00  0.00           S  
ATOM    676  C   CYS A  98     -30.758  19.595   4.403  1.00  0.00           C  
ATOM    677  O   CYS A  98     -30.347  20.499   5.128  1.00  0.00           O  
ATOM    678  N   THR A  99     -30.172  19.265   3.238  1.00  0.00           N  
ATOM    679  CA  THR A  99     -29.004  19.963   2.698  1.00  0.00           C  
ATOM    680  CB  THR A  99     -28.425  19.142   1.523  1.00  0.00           C  
ATOM    681  OG1 THR A  99     -28.283  17.768   1.813  1.00  0.00           O  
ATOM    682  CG2 THR A  99     -27.114  19.714   0.959  1.00  0.00           C  
ATOM    683  C   THR A  99     -29.459  21.345   2.219  1.00  0.00           C  
ATOM    684  O   THR A  99     -28.768  22.335   2.462  1.00  0.00           O  
ATOM    685  N   ALA A 100     -30.652  21.407   1.577  1.00  0.00           N  
ATOM    686  CA  ALA A 100     -31.263  22.650   1.086  1.00  0.00           C  
ATOM    687  CB  ALA A 100     -32.723  22.327   0.655  1.00  0.00           C  
ATOM    688  C   ALA A 100     -31.529  23.600   2.240  1.00  0.00           C  
ATOM    689  O   ALA A 100     -31.366  24.802   2.068  1.00  0.00           O  
ATOM    690  N   SER A 101     -31.895  23.054   3.420  1.00  0.00           N  
ATOM    691  CA  SER A 101     -32.137  23.820   4.637  1.00  0.00           C  
ATOM    692  CB  SER A 101     -32.786  22.947   5.719  1.00  0.00           C  
ATOM    693  OG  SER A 101     -33.939  22.255   5.284  1.00  0.00           O  
ATOM    694  C   SER A 101     -30.852  24.483   5.124  1.00  0.00           C  
ATOM    695  O   SER A 101     -30.851  25.702   5.282  1.00  0.00           O  
ATOM    696  N   VAL A 102     -29.742  23.725   5.279  1.00  0.00           N  
ATOM    697  CA  VAL A 102     -28.461  24.327   5.678  1.00  0.00           C  
ATOM    698  CB  VAL A 102     -27.323  23.263   5.818  1.00  0.00           C  
ATOM    699  CG1 VAL A 102     -26.209  23.744   6.764  1.00  0.00           C  
ATOM    700  CG2 VAL A 102     -27.778  21.842   6.170  1.00  0.00           C  
ATOM    701  C   VAL A 102     -27.972  25.293   4.599  1.00  0.00           C  
ATOM    702  O   VAL A 102     -27.396  26.329   4.926  1.00  0.00           O  
ATOM    703  N   TYR A 103     -28.244  24.973   3.322  1.00  0.00           N  
ATOM    704  CA  TYR A 103     -27.831  25.826   2.215  1.00  0.00           C  
ATOM    705  CB  TYR A 103     -27.910  25.054   0.891  1.00  0.00           C  
ATOM    706  CG  TYR A 103     -26.546  24.552   0.502  1.00  0.00           C  
ATOM    707  CD1 TYR A 103     -25.983  23.458   1.151  1.00  0.00           C  
ATOM    708  CE1 TYR A 103     -24.701  23.030   0.839  1.00  0.00           C  
ATOM    709  CD2 TYR A 103     -25.814  25.200  -0.488  1.00  0.00           C  
ATOM    710  CE2 TYR A 103     -24.530  24.778  -0.800  1.00  0.00           C  
ATOM    711  CZ  TYR A 103     -23.965  23.703  -0.132  1.00  0.00           C  
ATOM    712  OH  TYR A 103     -22.673  23.338  -0.454  1.00  0.00           O  
ATOM    713  C   TYR A 103     -28.590  27.150   2.136  1.00  0.00           C  
ATOM    714  O   TYR A 103     -27.950  28.176   1.917  1.00  0.00           O  
ATOM    715  N   ASN A 104     -29.923  27.138   2.411  1.00  0.00           N  
ATOM    716  CA  ASN A 104     -30.776  28.332   2.470  1.00  0.00           C  
ATOM    717  CB  ASN A 104     -32.245  27.937   2.708  1.00  0.00           C  
ATOM    718  CG  ASN A 104     -32.821  27.035   1.605  1.00  0.00           C  
ATOM    719  OD1 ASN A 104     -33.713  26.240   1.846  1.00  0.00           O  
ATOM    720  ND2 ASN A 104     -32.274  27.161   0.388  1.00  0.00           N  
ATOM    721  C   ASN A 104     -30.275  29.244   3.593  1.00  0.00           C  
ATOM    722  O   ASN A 104     -30.147  30.449   3.377  1.00  0.00           O  
ATOM    723  N   ILE A 105     -29.943  28.658   4.769  1.00  0.00           N  
ATOM    724  CA  ILE A 105     -29.405  29.383   5.926  1.00  0.00           C  
ATOM    725  CB  ILE A 105     -29.471  28.489   7.201  1.00  0.00           C  
ATOM    726  CG2 ILE A 105     -28.105  28.152   7.831  1.00  0.00           C  
ATOM    727  CG1 ILE A 105     -30.427  29.122   8.236  1.00  0.00           C  
ATOM    728  CD1 ILE A 105     -30.687  28.252   9.473  1.00  0.00           C  
ATOM    729  C   ILE A 105     -28.029  30.005   5.594  1.00  0.00           C  
ATOM    730  O   ILE A 105     -27.860  31.211   5.776  1.00  0.00           O  
ATOM    731  N   VAL A 106     -27.093  29.207   5.038  1.00  0.00           N  
ATOM    732  CA  VAL A 106     -25.760  29.670   4.638  1.00  0.00           C  
ATOM    733  CB  VAL A 106     -24.659  28.609   4.435  1.00  0.00           C  
ATOM    734  CG1 VAL A 106     -24.538  27.634   5.612  1.00  0.00           C  
ATOM    735  CG2 VAL A 106     -24.734  27.902   3.082  1.00  0.00           C  
ATOM    736  C   VAL A 106     -25.801  30.703   3.522  1.00  0.00           C  
ATOM    737  O   VAL A 106     -24.961  31.602   3.509  1.00  0.00           O  
ATOM    738  N   LEU A 107     -26.757  30.573   2.584  1.00  0.00           N  
ATOM    739  CA  LEU A 107     -26.910  31.535   1.494  1.00  0.00           C  
ATOM    740  CB  LEU A 107     -27.754  30.933   0.343  1.00  0.00           C  
ATOM    741  CG  LEU A 107     -26.938  30.325  -0.820  1.00  0.00           C  
ATOM    742  CD1 LEU A 107     -26.028  31.363  -1.492  1.00  0.00           C  
ATOM    743  CD2 LEU A 107     -26.142  29.077  -0.423  1.00  0.00           C  
ATOM    744  C   LEU A 107     -27.568  32.852   1.986  1.00  0.00           C  
ATOM    745  O   LEU A 107     -27.236  33.929   1.472  1.00  0.00           O  
ATOM    746  N   ILE A 108     -28.444  32.758   3.032  1.00  0.00           N  
ATOM    747  CA  ILE A 108     -29.112  33.895   3.688  1.00  0.00           C  
ATOM    748  CB  ILE A 108     -30.110  33.529   4.895  1.00  0.00           C  
ATOM    749  CG2 ILE A 108     -30.513  34.764   5.752  1.00  0.00           C  
ATOM    750  CG1 ILE A 108     -31.464  32.862   4.598  1.00  0.00           C  
ATOM    751  CD1 ILE A 108     -32.156  32.206   5.807  1.00  0.00           C  
ATOM    752  C   ILE A 108     -28.090  34.708   4.490  1.00  0.00           C  
ATOM    753  O   ILE A 108     -28.096  35.931   4.391  1.00  0.00           O  
ATOM    754  N   SER A 109     -27.221  34.029   5.279  1.00  0.00           N  
ATOM    755  CA  SER A 109     -26.175  34.661   6.086  1.00  0.00           C  
ATOM    756  CB  SER A 109     -25.434  33.559   6.874  1.00  0.00           C  
ATOM    757  OG  SER A 109     -26.236  33.001   7.905  1.00  0.00           O  
ATOM    758  C   SER A 109     -25.155  35.392   5.229  1.00  0.00           C  
ATOM    759  O   SER A 109     -24.719  36.470   5.630  1.00  0.00           O  
ATOM    760  N   TYR A 110     -24.770  34.819   4.060  1.00  0.00           N  
ATOM    761  CA  TYR A 110     -23.812  35.468   3.146  1.00  0.00           C  
ATOM    762  CB  TYR A 110     -23.612  34.450   2.014  1.00  0.00           C  
ATOM    763  CG  TYR A 110     -22.571  34.865   1.017  1.00  0.00           C  
ATOM    764  CD1 TYR A 110     -21.224  34.873   1.367  1.00  0.00           C  
ATOM    765  CE1 TYR A 110     -20.257  35.242   0.442  1.00  0.00           C  
ATOM    766  CD2 TYR A 110     -22.942  35.232  -0.271  1.00  0.00           C  
ATOM    767  CE2 TYR A 110     -21.979  35.598  -1.198  1.00  0.00           C  
ATOM    768  CZ  TYR A 110     -20.638  35.608  -0.846  1.00  0.00           C  
ATOM    769  OH  TYR A 110     -19.718  35.989  -1.801  1.00  0.00           O  
ATOM    770  C   TYR A 110     -24.384  36.812   2.620  1.00  0.00           C  
ATOM    771  O   TYR A 110     -23.645  37.802   2.539  1.00  0.00           O  
ATOM    772  N   ASP A 111     -25.712  36.850   2.348  1.00  0.00           N  
ATOM    773  CA  ASP A 111     -26.419  38.050   1.908  1.00  0.00           C  
ATOM    774  CB  ASP A 111     -27.860  37.634   1.510  1.00  0.00           C  
ATOM    775  CG  ASP A 111     -28.727  38.736   0.847  1.00  0.00           C  
ATOM    776  OD1 ASP A 111     -28.396  39.173  -0.263  1.00  0.00           O  
ATOM    777  OD2 ASP A 111     -29.754  39.115   1.424  1.00  0.00           O1-
ATOM    778  C   ASP A 111     -26.405  39.093   3.024  1.00  0.00           C  
ATOM    779  O   ASP A 111     -25.848  40.167   2.828  1.00  0.00           O  
ATOM    780  N   ARG A 112     -26.978  38.783   4.183  1.00  0.00           N  
ATOM    781  CA  ARG A 112     -27.003  39.741   5.290  1.00  0.00           C  
ATOM    782  CB  ARG A 112     -27.453  39.113   6.633  1.00  0.00           C  
ATOM    783  CG  ARG A 112     -28.967  39.198   6.883  1.00  0.00           C  
ATOM    784  CD  ARG A 112     -29.665  37.894   6.534  1.00  0.00           C  
ATOM    785  NE  ARG A 112     -30.905  38.131   5.823  1.00  0.00           N1+
ATOM    786  CZ  ARG A 112     -32.123  38.086   6.380  1.00  0.00           C  
ATOM    787  NH1 ARG A 112     -32.265  38.064   7.706  1.00  0.00           N  
ATOM    788  NH2 ARG A 112     -33.156  38.060   5.546  1.00  0.00           N  
ATOM    789  C   ARG A 112     -25.633  40.377   5.568  1.00  0.00           C  
ATOM    790  O   ARG A 112     -25.548  41.528   5.995  1.00  0.00           O  
ATOM    791  N   TYR A 113     -24.576  39.613   5.322  1.00  0.00           N  
ATOM    792  CA  TYR A 113     -23.205  40.023   5.569  1.00  0.00           C  
ATOM    793  CB  TYR A 113     -22.321  38.769   5.373  1.00  0.00           C  
ATOM    794  CG  TYR A 113     -20.849  38.952   5.654  1.00  0.00           C  
ATOM    795  CD1 TYR A 113     -20.279  38.336   6.759  1.00  0.00           C  
ATOM    796  CE1 TYR A 113     -18.922  38.459   7.008  1.00  0.00           C  
ATOM    797  CD2 TYR A 113     -20.026  39.700   4.811  1.00  0.00           C  
ATOM    798  CE2 TYR A 113     -18.672  39.852   5.079  1.00  0.00           C  
ATOM    799  CZ  TYR A 113     -18.114  39.227   6.189  1.00  0.00           C  
ATOM    800  OH  TYR A 113     -16.776  39.344   6.520  1.00  0.00           O  
ATOM    801  C   TYR A 113     -22.788  41.098   4.573  1.00  0.00           C  
ATOM    802  O   TYR A 113     -22.273  42.136   4.976  1.00  0.00           O  
ATOM    803  N   LEU A 114     -23.021  40.853   3.271  1.00  0.00           N  
ATOM    804  CA  LEU A 114     -22.712  41.818   2.217  1.00  0.00           C  
ATOM    805  CB  LEU A 114     -22.811  41.091   0.867  1.00  0.00           C  
ATOM    806  CG  LEU A 114     -21.789  39.950   0.696  1.00  0.00           C  
ATOM    807  CD1 LEU A 114     -22.096  39.149  -0.573  1.00  0.00           C  
ATOM    808  CD2 LEU A 114     -20.344  40.468   0.665  1.00  0.00           C  
ATOM    809  C   LEU A 114     -23.694  43.004   2.240  1.00  0.00           C  
ATOM    810  O   LEU A 114     -23.318  44.110   1.849  1.00  0.00           O  
ATOM    811  N   SER A 115     -24.928  42.772   2.747  1.00  0.00           N  
ATOM    812  CA  SER A 115     -25.986  43.775   2.910  1.00  0.00           C  
ATOM    813  CB  SER A 115     -27.284  43.054   3.322  1.00  0.00           C  
ATOM    814  OG  SER A 115     -28.428  43.893   3.345  1.00  0.00           O  
ATOM    815  C   SER A 115     -25.565  44.758   4.006  1.00  0.00           C  
ATOM    816  O   SER A 115     -25.822  45.959   3.898  1.00  0.00           O  
ATOM    817  N   VAL A 116     -24.911  44.235   5.055  1.00  0.00           N  
ATOM    818  CA  VAL A 116     -24.399  45.000   6.186  1.00  0.00           C  
ATOM    819  CB  VAL A 116     -24.105  44.038   7.364  1.00  0.00           C  
ATOM    820  CG1 VAL A 116     -23.118  44.594   8.406  1.00  0.00           C  
ATOM    821  CG2 VAL A 116     -25.413  43.650   8.073  1.00  0.00           C  
ATOM    822  C   VAL A 116     -23.163  45.814   5.733  1.00  0.00           C  
ATOM    823  O   VAL A 116     -23.112  47.021   5.983  1.00  0.00           O  
ATOM    824  N   SER A 117     -22.214  45.159   5.021  1.00  0.00           N  
ATOM    825  CA  SER A 117     -20.958  45.750   4.533  1.00  0.00           C  
ATOM    826  CB  SER A 117     -20.121  44.606   3.930  1.00  0.00           C  
ATOM    827  OG  SER A 117     -19.927  43.533   4.839  1.00  0.00           O  
ATOM    828  C   SER A 117     -21.118  46.856   3.487  1.00  0.00           C  
ATOM    829  O   SER A 117     -20.549  47.938   3.656  1.00  0.00           O  
ATOM    830  N   ASN A 118     -21.999  46.595   2.500  1.00  0.00           N  
ATOM    831  CA  ASN A 118     -22.398  47.677   1.607  1.00  0.00           C  
ATOM    832  CB  ASN A 118     -21.529  47.618   0.328  1.00  0.00           C  
ATOM    833  CG  ASN A 118     -20.797  48.944   0.082  1.00  0.00           C  
ATOM    834  OD1 ASN A 118     -20.923  49.563  -0.963  1.00  0.00           O  
ATOM    835  ND2 ASN A 118     -20.018  49.340   1.097  1.00  0.00           N  
ATOM    836  C   ASN A 118     -23.900  47.580   1.301  1.00  0.00           C  
ATOM    837  O   ASN A 118     -24.339  47.040   0.293  1.00  0.00           O  
ATOM    838  N   ALA A 119     -24.655  48.192   2.237  1.00  0.00           N  
ATOM    839  CA  ALA A 119     -26.113  48.243   2.147  1.00  0.00           C  
ATOM    840  CB  ALA A 119     -26.658  48.953   3.394  1.00  0.00           C  
ATOM    841  C   ALA A 119     -26.612  48.963   0.888  1.00  0.00           C  
ATOM    842  O   ALA A 119     -27.720  48.727   0.423  1.00  0.00           O  
ATOM    843  N   VAL A 120     -25.737  49.825   0.340  1.00  0.00           N  
ATOM    844  CA  VAL A 120     -26.038  50.538  -0.898  1.00  0.00           C  
ATOM    845  CB  VAL A 120     -25.133  51.788  -0.962  1.00  0.00           C  
ATOM    846  CG1 VAL A 120     -25.507  52.794   0.136  1.00  0.00           C  
ATOM    847  CG2 VAL A 120     -23.631  51.451  -0.885  1.00  0.00           C  
ATOM    848  C   VAL A 120     -25.841  49.629  -2.135  1.00  0.00           C  
ATOM    849  O   VAL A 120     -25.258  50.015  -3.140  1.00  0.00           O  
ATOM    850  N   SER A 121     -26.391  48.409  -2.027  1.00  0.00           N  
ATOM    851  CA  SER A 121     -26.217  47.362  -3.023  1.00  0.00           C  
ATOM    852  CB  SER A 121     -26.377  46.023  -2.274  1.00  0.00           C  
ATOM    853  OG  SER A 121     -25.116  45.546  -1.832  1.00  0.00           O  
ATOM    854  C   SER A 121     -27.217  47.523  -4.190  1.00  0.00           C  
ATOM    855  O   SER A 121     -27.766  46.552  -4.705  1.00  0.00           O  
ATOM    856  N   TYR A 122     -27.408  48.800  -4.579  1.00  0.00           N  
ATOM    857  CA  TYR A 122     -28.408  49.164  -5.573  1.00  0.00           C  
ATOM    858  CB  TYR A 122     -28.458  50.701  -5.645  1.00  0.00           C  
ATOM    859  CG  TYR A 122     -29.407  51.214  -6.697  1.00  0.00           C  
ATOM    860  CD1 TYR A 122     -30.767  51.331  -6.429  1.00  0.00           C  
ATOM    861  CE1 TYR A 122     -31.643  51.803  -7.400  1.00  0.00           C  
ATOM    862  CD2 TYR A 122     -28.934  51.577  -7.954  1.00  0.00           C  
ATOM    863  CE2 TYR A 122     -29.805  52.047  -8.926  1.00  0.00           C  
ATOM    864  CZ  TYR A 122     -31.160  52.160  -8.656  1.00  0.00           C  
ATOM    865  OH  TYR A 122     -31.990  52.632  -9.654  1.00  0.00           O  
ATOM    866  C   TYR A 122     -28.071  48.558  -6.937  1.00  0.00           C  
ATOM    867  O   TYR A 122     -28.933  48.066  -7.655  1.00  0.00           O  
ATOM    868  N   ARG A 123     -26.763  48.621  -7.248  1.00  0.00           N  
ATOM    869  CA  ARG A 123     -26.294  48.153  -8.545  1.00  0.00           C  
ATOM    870  CB  ARG A 123     -24.934  48.788  -8.878  1.00  0.00           C  
ATOM    871  CG  ARG A 123     -24.534  48.556 -10.344  1.00  0.00           C  
ATOM    872  CD  ARG A 123     -23.289  49.347 -10.752  1.00  0.00           C  
ATOM    873  NE  ARG A 123     -23.031  49.146 -12.176  1.00  0.00           N1+
ATOM    874  CZ  ARG A 123     -22.108  49.865 -12.856  1.00  0.00           C  
ATOM    875  NH1 ARG A 123     -21.378  50.778 -12.220  1.00  0.00           N  
ATOM    876  NH2 ARG A 123     -21.937  49.652 -14.160  1.00  0.00           N  
ATOM    877  C   ARG A 123     -26.232  46.613  -8.571  1.00  0.00           C  
ATOM    878  O   ARG A 123     -25.176  46.001  -8.500  1.00  0.00           O  
ATOM    879  N   THR A 124     -27.445  46.044  -8.697  1.00  0.00           N  
ATOM    880  CA  THR A 124     -27.621  44.644  -9.050  1.00  0.00           C  
ATOM    881  CB  THR A 124     -26.829  44.350 -10.350  1.00  0.00           C  
ATOM    882  OG1 THR A 124     -26.862  45.477 -11.211  1.00  0.00           O  
ATOM    883  CG2 THR A 124     -27.312  43.101 -11.109  1.00  0.00           C  
ATOM    884  C   THR A 124     -27.243  43.671  -7.907  1.00  0.00           C  
ATOM    885  O   THR A 124     -27.176  42.471  -8.126  1.00  0.00           O  
ATOM    886  N   GLN A 125     -27.015  44.219  -6.692  1.00  0.00           N  
ATOM    887  CA  GLN A 125     -26.537  43.369  -5.597  1.00  0.00           C  
ATOM    888  CB  GLN A 125     -25.424  44.138  -4.865  1.00  0.00           C  
ATOM    889  CG  GLN A 125     -24.119  44.204  -5.683  1.00  0.00           C  
ATOM    890  CD  GLN A 125     -23.140  45.301  -5.220  1.00  0.00           C  
ATOM    891  OE1 GLN A 125     -22.336  45.795  -5.996  1.00  0.00           O  
ATOM    892  NE2 GLN A 125     -23.235  45.667  -3.935  1.00  0.00           N  
ATOM    893  C   GLN A 125     -27.700  42.898  -4.693  1.00  0.00           C  
ATOM    894  O   GLN A 125     -27.755  41.738  -4.277  1.00  0.00           O  
ATOM    895  N   HIS A 126     -28.649  43.830  -4.439  1.00  0.00           N  
ATOM    896  CA  HIS A 126     -29.926  43.450  -3.819  1.00  0.00           C  
ATOM    897  CB  HIS A 126     -30.249  44.249  -2.534  1.00  0.00           C  
ATOM    898  CG  HIS A 126     -30.357  45.754  -2.698  1.00  0.00           C  
ATOM    899  CD2 HIS A 126     -29.817  46.736  -1.848  1.00  0.00           C  
ATOM    900  ND1 HIS A 126     -31.045  46.388  -3.670  1.00  0.00           N  
ATOM    901  CE1 HIS A 126     -30.929  47.701  -3.420  1.00  0.00           C  
ATOM    902  NE2 HIS A 126     -30.189  47.943  -2.327  1.00  0.00           N  
ATOM    903  C   HIS A 126     -31.041  43.411  -4.892  1.00  0.00           C  
ATOM    904  O   HIS A 126     -31.880  44.292  -5.018  1.00  0.00           O  
ATOM    905  N   THR A 127     -31.000  42.309  -5.660  1.00  0.00           N  
ATOM    906  CA  THR A 127     -31.956  42.110  -6.772  1.00  0.00           C  
ATOM    907  CB  THR A 127     -31.375  42.677  -8.081  1.00  0.00           C  
ATOM    908  OG1 THR A 127     -32.385  42.628  -9.079  1.00  0.00           O  
ATOM    909  CG2 THR A 127     -30.132  41.908  -8.550  1.00  0.00           C  
ATOM    910  C   THR A 127     -32.322  40.663  -6.921  1.00  0.00           C  
ATOM    911  O   THR A 127     -31.555  39.740  -6.631  1.00  0.00           O  
ATOM    912  N   GLY A 128     -33.556  40.421  -7.493  1.00  0.00           N  
ATOM    913  CA  GLY A 128     -34.040  39.089  -7.882  1.00  0.00           C  
ATOM    914  C   GLY A 128     -33.025  38.343  -8.752  1.00  0.00           C  
ATOM    915  O   GLY A 128     -32.807  37.155  -8.532  1.00  0.00           O  
ATOM    916  N   VAL A 129     -32.385  39.051  -9.714  1.00  0.00           N  
ATOM    917  CA  VAL A 129     -31.379  38.493 -10.630  1.00  0.00           C  
ATOM    918  CB  VAL A 129     -30.982  39.605 -11.635  1.00  0.00           C  
ATOM    919  CG1 VAL A 129     -30.034  39.095 -12.734  1.00  0.00           C  
ATOM    920  CG2 VAL A 129     -32.215  40.251 -12.292  1.00  0.00           C  
ATOM    921  C   VAL A 129     -30.128  37.915  -9.943  1.00  0.00           C  
ATOM    922  O   VAL A 129     -29.451  37.067 -10.530  1.00  0.00           O  
ATOM    923  N   LEU A 130     -29.841  38.354  -8.700  1.00  0.00           N  
ATOM    924  CA  LEU A 130     -28.711  37.872  -7.903  1.00  0.00           C  
ATOM    925  CB  LEU A 130     -27.841  39.048  -7.406  1.00  0.00           C  
ATOM    926  CG  LEU A 130     -26.326  38.732  -7.321  1.00  0.00           C  
ATOM    927  CD1 LEU A 130     -25.536  39.948  -6.829  1.00  0.00           C  
ATOM    928  CD2 LEU A 130     -25.976  37.515  -6.454  1.00  0.00           C  
ATOM    929  C   LEU A 130     -29.175  36.959  -6.753  1.00  0.00           C  
ATOM    930  O   LEU A 130     -28.419  36.080  -6.331  1.00  0.00           O  
ATOM    931  N   LYS A 131     -30.419  37.162  -6.260  1.00  0.00           N  
ATOM    932  CA  LYS A 131     -31.008  36.357  -5.191  1.00  0.00           C  
ATOM    933  CB  LYS A 131     -32.199  37.058  -4.504  1.00  0.00           C  
ATOM    934  CG  LYS A 131     -31.920  38.398  -3.789  1.00  0.00           C  
ATOM    935  CD  LYS A 131     -30.609  38.502  -2.988  1.00  0.00           C  
ATOM    936  CE  LYS A 131     -29.492  39.274  -3.698  1.00  0.00           C  
ATOM    937  NZ  LYS A 131     -28.335  39.574  -2.852  1.00  0.00           N1+
ATOM    938  C   LYS A 131     -31.462  35.006  -5.750  1.00  0.00           C  
ATOM    939  O   LYS A 131     -31.043  33.974  -5.229  1.00  0.00           O  
ATOM    940  N   ILE A 132     -32.279  35.013  -6.840  1.00  0.00           N  
ATOM    941  CA  ILE A 132     -32.790  33.805  -7.506  1.00  0.00           C  
ATOM    942  CB  ILE A 132     -33.939  34.226  -8.459  1.00  0.00           C  
ATOM    943  CG2 ILE A 132     -34.584  33.014  -9.157  1.00  0.00           C  
ATOM    944  CG1 ILE A 132     -35.021  35.045  -7.711  1.00  0.00           C  
ATOM    945  CD1 ILE A 132     -36.046  35.702  -8.644  1.00  0.00           C  
ATOM    946  C   ILE A 132     -31.695  32.989  -8.218  1.00  0.00           C  
ATOM    947  O   ILE A 132     -31.903  31.806  -8.483  1.00  0.00           O  
ATOM    948  N   VAL A 133     -30.530  33.608  -8.498  1.00  0.00           N  
ATOM    949  CA  VAL A 133     -29.378  32.943  -9.104  1.00  0.00           C  
ATOM    950  CB  VAL A 133     -28.480  33.973  -9.822  1.00  0.00           C  
ATOM    951  CG1 VAL A 133     -27.047  33.475 -10.075  1.00  0.00           C  
ATOM    952  CG2 VAL A 133     -29.127  34.354 -11.161  1.00  0.00           C  
ATOM    953  C   VAL A 133     -28.659  32.108  -8.047  1.00  0.00           C  
ATOM    954  O   VAL A 133     -28.141  31.041  -8.370  1.00  0.00           O  
ATOM    955  N   THR A 134     -28.628  32.599  -6.785  1.00  0.00           N  
ATOM    956  CA  THR A 134     -28.002  31.914  -5.650  1.00  0.00           C  
ATOM    957  CB  THR A 134     -27.391  32.967  -4.703  1.00  0.00           C  
ATOM    958  OG1 THR A 134     -28.250  34.072  -4.505  1.00  0.00           O  
ATOM    959  CG2 THR A 134     -26.005  33.437  -5.175  1.00  0.00           C  
ATOM    960  C   THR A 134     -28.950  30.957  -4.912  1.00  0.00           C  
ATOM    961  O   THR A 134     -28.473  30.100  -4.173  1.00  0.00           O  
ATOM    962  N   LEU A 135     -30.255  31.057  -5.155  1.00  0.00           N  
ATOM    963  CA  LEU A 135     -31.223  30.143  -4.542  1.00  0.00           C  
ATOM    964  CB  LEU A 135     -32.465  30.978  -4.209  1.00  0.00           C  
ATOM    965  CG  LEU A 135     -32.192  31.982  -3.071  1.00  0.00           C  
ATOM    966  CD1 LEU A 135     -33.279  33.058  -3.000  1.00  0.00           C  
ATOM    967  CD2 LEU A 135     -32.041  31.264  -1.723  1.00  0.00           C  
ATOM    968  C   LEU A 135     -31.563  28.951  -5.448  1.00  0.00           C  
ATOM    969  O   LEU A 135     -32.250  28.015  -5.036  1.00  0.00           O  
ATOM    970  N   MET A 136     -31.069  29.007  -6.679  1.00  0.00           N  
ATOM    971  CA  MET A 136     -31.279  27.982  -7.704  1.00  0.00           C  
ATOM    972  CB  MET A 136     -31.464  28.702  -9.050  1.00  0.00           C  
ATOM    973  CG  MET A 136     -31.614  27.758 -10.250  1.00  0.00           C  
ATOM    974  SD  MET A 136     -31.903  28.681 -11.772  1.00  0.00           S  
ATOM    975  CE  MET A 136     -30.311  29.517 -11.911  1.00  0.00           C  
ATOM    976  C   MET A 136     -30.004  27.130  -7.695  1.00  0.00           C  
ATOM    977  O   MET A 136     -30.094  25.902  -7.663  1.00  0.00           O  
ATOM    978  N   VAL A 137     -28.845  27.802  -7.648  1.00  0.00           N  
ATOM    979  CA  VAL A 137     -27.521  27.190  -7.575  1.00  0.00           C  
ATOM    980  CB  VAL A 137     -26.460  28.288  -7.817  1.00  0.00           C  
ATOM    981  CG1 VAL A 137     -25.022  27.840  -7.505  1.00  0.00           C  
ATOM    982  CG2 VAL A 137     -26.528  28.778  -9.274  1.00  0.00           C  
ATOM    983  C   VAL A 137     -27.292  26.418  -6.290  1.00  0.00           C  
ATOM    984  O   VAL A 137     -26.515  25.455  -6.280  1.00  0.00           O  
ATOM    985  N   ALA A 138     -27.978  26.826  -5.195  1.00  0.00           N  
ATOM    986  CA  ALA A 138     -27.926  26.156  -3.893  1.00  0.00           C  
ATOM    987  CB  ALA A 138     -28.607  27.064  -2.862  1.00  0.00           C  
ATOM    988  C   ALA A 138     -28.659  24.813  -3.969  1.00  0.00           C  
ATOM    989  O   ALA A 138     -28.199  23.847  -3.362  1.00  0.00           O  
ATOM    990  N   VAL A 139     -29.767  24.740  -4.739  1.00  0.00           N  
ATOM    991  CA  VAL A 139     -30.522  23.502  -4.934  1.00  0.00           C  
ATOM    992  CB  VAL A 139     -31.935  23.880  -5.436  1.00  0.00           C  
ATOM    993  CG1 VAL A 139     -32.833  22.659  -5.707  1.00  0.00           C  
ATOM    994  CG2 VAL A 139     -32.640  24.811  -4.435  1.00  0.00           C  
ATOM    995  C   VAL A 139     -29.812  22.514  -5.872  1.00  0.00           C  
ATOM    996  O   VAL A 139     -30.180  21.336  -5.908  1.00  0.00           O  
ATOM    997  N   TRP A 140     -28.750  22.977  -6.625  1.00  0.00           N  
ATOM    998  CA  TRP A 140     -27.944  22.122  -7.513  1.00  0.00           C  
ATOM    999  CB  TRP A 140     -27.189  23.008  -8.521  1.00  0.00           C  
ATOM   1000  CG  TRP A 140     -26.483  22.140  -9.544  1.00  0.00           C  
ATOM   1001  CD2 TRP A 140     -25.152  21.587  -9.462  1.00  0.00           C  
ATOM   1002  CE2 TRP A 140     -24.950  20.824 -10.635  1.00  0.00           C  
ATOM   1003  CE3 TRP A 140     -24.161  21.672  -8.520  1.00  0.00           C  
ATOM   1004  CD1 TRP A 140     -27.022  21.697 -10.755  1.00  0.00           C  
ATOM   1005  NE1 TRP A 140     -26.112  20.920 -11.392  1.00  0.00           N  
ATOM   1006  CZ2 TRP A 140     -23.764  20.167 -10.828  1.00  0.00           C  
ATOM   1007  CZ3 TRP A 140     -22.952  21.004  -8.712  1.00  0.00           C  
ATOM   1008  CH2 TRP A 140     -22.754  20.250  -9.869  1.00  0.00           C  
ATOM   1009  C   TRP A 140     -26.976  21.319  -6.687  1.00  0.00           C  
ATOM   1010  O   TRP A 140     -26.710  20.135  -6.926  1.00  0.00           O  
ATOM   1011  N   VAL A 141     -26.390  21.970  -5.621  1.00  0.00           N  
ATOM   1012  CA  VAL A 141     -25.473  21.288  -4.711  1.00  0.00           C  
ATOM   1013  CB  VAL A 141     -24.656  22.347  -3.937  1.00  0.00           C  
ATOM   1014  CG1 VAL A 141     -23.554  21.699  -3.084  1.00  0.00           C  
ATOM   1015  CG2 VAL A 141     -24.018  23.381  -4.880  1.00  0.00           C  
ATOM   1016  C   VAL A 141     -26.209  20.334  -3.746  1.00  0.00           C  
ATOM   1017  O   VAL A 141     -25.589  19.426  -3.183  1.00  0.00           O  
ATOM   1018  N   LEU A 142     -27.527  20.543  -3.571  1.00  0.00           N  
ATOM   1019  CA  LEU A 142     -28.398  19.738  -2.717  1.00  0.00           C  
ATOM   1020  CB  LEU A 142     -29.642  20.327  -2.071  1.00  0.00           C  
ATOM   1021  CG  LEU A 142     -29.681  21.809  -2.089  1.00  0.00           C  
ATOM   1022  CD1 LEU A 142     -31.150  22.194  -1.927  1.00  0.00           C  
ATOM   1023  CD2 LEU A 142     -28.702  22.450  -1.108  1.00  0.00           C  
ATOM   1024  C   LEU A 142     -28.963  18.534  -3.460  1.00  0.00           C  
ATOM   1025  O   LEU A 142     -29.028  17.446  -2.881  1.00  0.00           O  
ATOM   1026  N   ALA A 143     -29.367  18.716  -4.737  1.00  0.00           N  
ATOM   1027  CA  ALA A 143     -29.909  17.638  -5.567  1.00  0.00           C  
ATOM   1028  CB  ALA A 143     -30.569  18.279  -6.793  1.00  0.00           C  
ATOM   1029  C   ALA A 143     -28.858  16.627  -6.026  1.00  0.00           C  
ATOM   1030  O   ALA A 143     -29.220  15.591  -6.591  1.00  0.00           O  
ATOM   1031  N   PHE A 144     -27.586  16.986  -5.757  1.00  0.00           N  
ATOM   1032  CA  PHE A 144     -26.488  16.078  -6.048  1.00  0.00           C  
ATOM   1033  CB  PHE A 144     -25.158  16.764  -5.697  1.00  0.00           C  
ATOM   1034  CG  PHE A 144     -24.007  16.101  -6.407  1.00  0.00           C  
ATOM   1035  CD1 PHE A 144     -23.609  16.551  -7.662  1.00  0.00           C  
ATOM   1036  CD2 PHE A 144     -23.336  15.025  -5.832  1.00  0.00           C  
ATOM   1037  CE1 PHE A 144     -22.566  15.931  -8.338  1.00  0.00           C  
ATOM   1038  CE2 PHE A 144     -22.293  14.402  -6.506  1.00  0.00           C  
ATOM   1039  CZ  PHE A 144     -21.909  14.854  -7.761  1.00  0.00           C  
ATOM   1040  C   PHE A 144     -26.666  14.761  -5.264  1.00  0.00           C  
ATOM   1041  O   PHE A 144     -26.257  13.689  -5.695  1.00  0.00           O  
ATOM   1042  N   LEU A 145     -27.379  14.907  -4.130  1.00  0.00           N  
ATOM   1043  CA  LEU A 145     -27.741  13.781  -3.289  1.00  0.00           C  
ATOM   1044  CB  LEU A 145     -28.105  14.304  -1.879  1.00  0.00           C  
ATOM   1045  CG  LEU A 145     -26.951  14.939  -1.060  1.00  0.00           C  
ATOM   1046  CD1 LEU A 145     -25.643  14.138  -1.139  1.00  0.00           C  
ATOM   1047  CD2 LEU A 145     -26.711  16.428  -1.340  1.00  0.00           C  
ATOM   1048  C   LEU A 145     -28.911  12.942  -3.881  1.00  0.00           C  
ATOM   1049  O   LEU A 145     -29.662  12.321  -3.143  1.00  0.00           O  
ATOM   1050  N   VAL A 146     -29.071  13.007  -5.216  1.00  0.00           N  
ATOM   1051  CA  VAL A 146     -29.818  11.973  -5.917  1.00  0.00           C  
ATOM   1052  CB  VAL A 146     -30.379  12.545  -7.235  1.00  0.00           C  
ATOM   1053  CG1 VAL A 146     -30.887  11.456  -8.194  1.00  0.00           C  
ATOM   1054  CG2 VAL A 146     -31.515  13.539  -6.939  1.00  0.00           C  
ATOM   1055  C   VAL A 146     -28.875  10.775  -6.105  1.00  0.00           C  
ATOM   1056  O   VAL A 146     -29.269   9.619  -6.027  1.00  0.00           O  
ATOM   1057  N   ASN A 147     -27.589  11.131  -6.312  1.00  0.00           N  
ATOM   1058  CA  ASN A 147     -26.563  10.110  -6.488  1.00  0.00           C  
ATOM   1059  CB  ASN A 147     -25.194  10.775  -6.725  1.00  0.00           C  
ATOM   1060  CG  ASN A 147     -25.138  11.474  -8.091  1.00  0.00           C  
ATOM   1061  OD1 ASN A 147     -25.158  10.840  -9.134  1.00  0.00           O  
ATOM   1062  ND2 ASN A 147     -25.034  12.805  -8.039  1.00  0.00           N  
ATOM   1063  C   ASN A 147     -26.481   9.207  -5.245  1.00  0.00           C  
ATOM   1064  O   ASN A 147     -26.522   7.989  -5.346  1.00  0.00           O  
ATOM   1065  N   GLY A 148     -26.377   9.883  -4.080  1.00  0.00           N  
ATOM   1066  CA  GLY A 148     -26.163   9.194  -2.803  1.00  0.00           C  
ATOM   1067  C   GLY A 148     -26.982   7.891  -2.643  1.00  0.00           C  
ATOM   1068  O   GLY A 148     -26.433   6.797  -2.672  1.00  0.00           O  
ATOM   1069  N   PRO A 149     -28.326   8.023  -2.502  1.00  0.00           N  
ATOM   1070  CD  PRO A 149     -29.055   9.289  -2.382  1.00  0.00           C  
ATOM   1071  CA  PRO A 149     -29.192   6.848  -2.340  1.00  0.00           C  
ATOM   1072  CB  PRO A 149     -30.603   7.449  -2.338  1.00  0.00           C  
ATOM   1073  CG  PRO A 149     -30.402   8.863  -1.797  1.00  0.00           C  
ATOM   1074  C   PRO A 149     -29.128   5.708  -3.381  1.00  0.00           C  
ATOM   1075  O   PRO A 149     -29.665   4.629  -3.155  1.00  0.00           O  
ATOM   1076  N   MET A 150     -28.460   6.004  -4.514  1.00  0.00           N  
ATOM   1077  CA  MET A 150     -28.425   5.081  -5.641  1.00  0.00           C  
ATOM   1078  CB  MET A 150     -28.920   5.814  -6.898  1.00  0.00           C  
ATOM   1079  CG  MET A 150     -30.324   6.414  -6.728  1.00  0.00           C  
ATOM   1080  SD  MET A 150     -31.054   6.899  -8.308  1.00  0.00           S  
ATOM   1081  CE  MET A 150     -29.717   7.906  -8.978  1.00  0.00           C  
ATOM   1082  C   MET A 150     -27.006   4.545  -5.897  1.00  0.00           C  
ATOM   1083  O   MET A 150     -26.838   3.487  -6.491  1.00  0.00           O  
ATOM   1084  N   ILE A 151     -25.988   5.315  -5.467  1.00  0.00           N  
ATOM   1085  CA  ILE A 151     -24.634   4.989  -5.903  1.00  0.00           C  
ATOM   1086  CB  ILE A 151     -23.689   6.206  -5.751  1.00  0.00           C  
ATOM   1087  CG2 ILE A 151     -23.458   6.642  -4.295  1.00  0.00           C  
ATOM   1088  CG1 ILE A 151     -22.350   5.964  -6.474  1.00  0.00           C  
ATOM   1089  CD1 ILE A 151     -21.466   7.213  -6.556  1.00  0.00           C  
ATOM   1090  C   ILE A 151     -24.127   3.707  -5.210  1.00  0.00           C  
ATOM   1091  O   ILE A 151     -23.635   3.708  -4.090  1.00  0.00           O  
ATOM   1092  N   LEU A 152     -24.265   2.614  -5.985  1.00  0.00           N  
ATOM   1093  CA  LEU A 152     -23.462   1.403  -5.822  1.00  0.00           C  
ATOM   1094  CB  LEU A 152     -21.977   1.735  -6.094  1.00  0.00           C  
ATOM   1095  CG  LEU A 152     -21.702   2.393  -7.460  1.00  0.00           C  
ATOM   1096  CD1 LEU A 152     -20.250   2.884  -7.533  1.00  0.00           C  
ATOM   1097  CD2 LEU A 152     -22.012   1.446  -8.627  1.00  0.00           C  
ATOM   1098  C   LEU A 152     -23.580   0.751  -4.428  1.00  0.00           C  
ATOM   1099  O   LEU A 152     -22.747  -0.060  -4.047  1.00  0.00           O  
ATOM   1100  N   SER A 154     -24.642   1.136  -3.693  1.00  0.00           N  
ATOM   1101  CA  SER A 154     -24.818   0.654  -2.326  1.00  0.00           C  
ATOM   1102  CB  SER A 154     -25.096  -0.868  -2.316  1.00  0.00           C  
ATOM   1103  OG  SER A 154     -26.455  -1.134  -2.633  1.00  0.00           O  
ATOM   1104  C   SER A 154     -23.643   1.037  -1.399  1.00  0.00           C  
ATOM   1105  O   SER A 154     -23.322   0.330  -0.454  1.00  0.00           O  
ATOM   1106  N   GLU A 155     -23.087   2.236  -1.669  1.00  0.00           N  
ATOM   1107  CA  GLU A 155     -22.305   2.908  -0.632  1.00  0.00           C  
ATOM   1108  CB  GLU A 155     -21.592   4.137  -1.220  1.00  0.00           C  
ATOM   1109  CG  GLU A 155     -20.600   3.793  -2.338  1.00  0.00           C  
ATOM   1110  CD  GLU A 155     -19.817   5.051  -2.744  1.00  0.00           C  
ATOM   1111  OE1 GLU A 155     -20.103   5.614  -3.800  1.00  0.00           O  
ATOM   1112  OE2 GLU A 155     -18.933   5.456  -1.990  1.00  0.00           O1-
ATOM   1113  C   GLU A 155     -23.264   3.377   0.476  1.00  0.00           C  
ATOM   1114  O   GLU A 155     -23.036   3.210   1.669  1.00  0.00           O  
ATOM   1115  N   SER A 156     -24.367   3.952  -0.051  1.00  0.00           N  
ATOM   1116  CA  SER A 156     -25.476   4.442   0.755  1.00  0.00           C  
ATOM   1117  CB  SER A 156     -26.351   5.333  -0.147  1.00  0.00           C  
ATOM   1118  OG  SER A 156     -27.612   5.663   0.409  1.00  0.00           O  
ATOM   1119  C   SER A 156     -26.233   3.252   1.379  1.00  0.00           C  
ATOM   1120  O   SER A 156     -25.848   2.742   2.420  1.00  0.00           O  
ATOM   1121  N   TRP A 157     -27.327   2.832   0.706  1.00  0.00           N  
ATOM   1122  CA  TRP A 157     -28.053   1.658   1.184  1.00  0.00           C  
ATOM   1123  CB  TRP A 157     -29.447   1.619   0.531  1.00  0.00           C  
ATOM   1124  CG  TRP A 157     -30.195   0.400   1.024  1.00  0.00           C  
ATOM   1125  CD2 TRP A 157     -30.808   0.203   2.315  1.00  0.00           C  
ATOM   1126  CE2 TRP A 157     -31.309  -1.119   2.330  1.00  0.00           C  
ATOM   1127  CE3 TRP A 157     -30.943   0.998   3.420  1.00  0.00           C  
ATOM   1128  CD1 TRP A 157     -30.356  -0.794   0.319  1.00  0.00           C  
ATOM   1129  NE1 TRP A 157     -31.011  -1.685   1.099  1.00  0.00           N  
ATOM   1130  CZ2 TRP A 157     -31.921  -1.608   3.451  1.00  0.00           C  
ATOM   1131  CZ3 TRP A 157     -31.566   0.501   4.565  1.00  0.00           C  
ATOM   1132  CH2 TRP A 157     -32.050  -0.805   4.582  1.00  0.00           C  
ATOM   1133  C   TRP A 157     -27.221   0.393   0.866  1.00  0.00           C  
ATOM   1134  O   TRP A 157     -27.297  -0.176  -0.220  1.00  0.00           O  
ATOM   1135  N   LYS A 158     -26.410   0.048   1.884  1.00  0.00           N  
ATOM   1136  CA  LYS A 158     -25.360  -0.933   1.734  1.00  0.00           C  
ATOM   1137  CB  LYS A 158     -24.209  -0.374   2.602  1.00  0.00           C  
ATOM   1138  CG  LYS A 158     -22.932  -1.219   2.694  1.00  0.00           C  
ATOM   1139  CD  LYS A 158     -21.831  -0.465   3.461  1.00  0.00           C  
ATOM   1140  CE  LYS A 158     -20.696  -1.373   3.948  1.00  0.00           C  
ATOM   1141  NZ  LYS A 158     -19.582  -0.628   4.542  1.00  0.00           N1+
ATOM   1142  C   LYS A 158     -25.817  -2.355   2.133  1.00  0.00           C  
ATOM   1143  O   LYS A 158     -26.023  -3.224   1.296  1.00  0.00           O  
ATOM   1144  N   ASP A 159     -25.889  -2.548   3.465  1.00  0.00           N  
ATOM   1145  CA  ASP A 159     -25.817  -3.897   4.022  1.00  0.00           C  
ATOM   1146  CB  ASP A 159     -25.468  -3.795   5.520  1.00  0.00           C  
ATOM   1147  CG  ASP A 159     -24.220  -2.920   5.736  1.00  0.00           C  
ATOM   1148  OD1 ASP A 159     -24.382  -1.725   5.974  1.00  0.00           O  
ATOM   1149  OD2 ASP A 159     -23.104  -3.432   5.655  1.00  0.00           O1-
ATOM   1150  C   ASP A 159     -27.118  -4.695   3.804  1.00  0.00           C  
ATOM   1151  O   ASP A 159     -27.116  -5.797   3.271  1.00  0.00           O  
ATOM   1152  N   GLU A 160     -28.226  -4.095   4.275  1.00  0.00           N  
ATOM   1153  CA  GLU A 160     -29.504  -4.802   4.228  1.00  0.00           C  
ATOM   1154  CB  GLU A 160     -30.466  -4.180   5.256  1.00  0.00           C  
ATOM   1155  CG  GLU A 160     -30.078  -4.473   6.716  1.00  0.00           C  
ATOM   1156  CD  GLU A 160     -31.100  -3.865   7.694  1.00  0.00           C  
ATOM   1157  OE1 GLU A 160     -31.359  -2.666   7.624  1.00  0.00           O  
ATOM   1158  OE2 GLU A 160     -31.655  -4.578   8.530  1.00  0.00           O1-
ATOM   1159  C   GLU A 160     -30.112  -4.766   2.805  1.00  0.00           C  
ATOM   1160  O   GLU A 160     -29.839  -3.895   1.991  1.00  0.00           O  
ATOM   1161  N   GLY A 161     -30.972  -5.779   2.590  1.00  0.00           N  
ATOM   1162  CA  GLY A 161     -31.775  -5.944   1.365  1.00  0.00           C  
ATOM   1163  C   GLY A 161     -33.181  -6.337   1.707  1.00  0.00           C  
ATOM   1164  O   GLY A 161     -33.525  -7.509   1.899  1.00  0.00           O  
ATOM   1165  N   SER A 162     -34.093  -5.313   1.816  1.00  0.00           N  
ATOM   1166  CA  SER A 162     -35.509  -5.561   2.146  1.00  0.00           C  
ATOM   1167  CB  SER A 162     -35.788  -5.104   3.597  1.00  0.00           C  
ATOM   1168  OG  SER A 162     -36.770  -5.878   4.266  1.00  0.00           O  
ATOM   1169  C   SER A 162     -36.386  -4.876   1.127  1.00  0.00           C  
ATOM   1170  O   SER A 162     -36.007  -4.626  -0.024  1.00  0.00           O  
ATOM   1171  N   GLU A 163     -37.597  -4.372   1.473  1.00  0.00           N  
ATOM   1172  CA  GLU A 163     -38.427  -3.646   0.491  1.00  0.00           C  
ATOM   1173  CB  GLU A 163     -39.900  -3.833   0.898  1.00  0.00           C  
ATOM   1174  CG  GLU A 163     -40.357  -5.310   0.868  1.00  0.00           C  
ATOM   1175  CD  GLU A 163     -40.217  -6.058   2.212  1.00  0.00           C  
ATOM   1176  OE1 GLU A 163     -41.230  -6.528   2.726  1.00  0.00           O  
ATOM   1177  OE2 GLU A 163     -39.107  -6.169   2.734  1.00  0.00           O1-
ATOM   1178  C   GLU A 163     -38.044  -2.142   0.367  1.00  0.00           C  
ATOM   1179  O   GLU A 163     -38.897  -1.263   0.354  1.00  0.00           O  
ATOM   1180  N   CYS A 164     -36.719  -1.903   0.277  1.00  0.00           N  
ATOM   1181  CA  CYS A 164     -36.154  -0.549   0.290  1.00  0.00           C  
ATOM   1182  CB  CYS A 164     -36.565   0.232  -0.969  1.00  0.00           C  
ATOM   1183  SG  CYS A 164     -35.565   1.718  -1.245  1.00  0.00           S  
ATOM   1184  C   CYS A 164     -36.575   0.200   1.565  1.00  0.00           C  
ATOM   1185  O   CYS A 164     -37.437   1.069   1.560  1.00  0.00           O  
ATOM   1186  N   GLU A 165     -35.913  -0.222   2.654  1.00  0.00           N  
ATOM   1187  CA  GLU A 165     -36.262   0.289   3.968  1.00  0.00           C  
ATOM   1188  CB  GLU A 165     -35.708  -0.677   5.018  1.00  0.00           C  
ATOM   1189  CG  GLU A 165     -36.125  -0.358   6.463  1.00  0.00           C  
ATOM   1190  CD  GLU A 165     -35.199  -1.103   7.428  1.00  0.00           C  
ATOM   1191  OE1 GLU A 165     -34.047  -0.696   7.547  1.00  0.00           O  
ATOM   1192  OE2 GLU A 165     -35.603  -2.080   8.058  1.00  0.00           O1-
ATOM   1193  C   GLU A 165     -35.674   1.715   4.127  1.00  0.00           C  
ATOM   1194  O   GLU A 165     -34.551   1.980   3.714  1.00  0.00           O  
ATOM   1195  N   PRO A 166     -36.450   2.684   4.730  1.00  0.00           N  
ATOM   1196  CD  PRO A 166     -37.854   2.484   5.108  1.00  0.00           C  
ATOM   1197  CA  PRO A 166     -36.006   4.068   5.003  1.00  0.00           C  
ATOM   1198  CB  PRO A 166     -37.316   4.839   5.131  1.00  0.00           C  
ATOM   1199  CG  PRO A 166     -38.302   3.828   5.691  1.00  0.00           C  
ATOM   1200  C   PRO A 166     -35.081   4.102   6.196  1.00  0.00           C  
ATOM   1201  O   PRO A 166     -35.349   4.634   7.280  1.00  0.00           O  
ATOM   1202  N   GLY A 167     -33.864   3.493   6.012  1.00  0.00           N  
ATOM   1203  CA  GLY A 167     -32.803   3.534   7.035  1.00  0.00           C  
ATOM   1204  C   GLY A 167     -31.498   3.974   6.442  1.00  0.00           C  
ATOM   1205  O   GLY A 167     -30.981   3.428   5.459  1.00  0.00           O  
ATOM   1206  N   PHE A 168     -30.864   5.027   7.065  1.00  0.00           N  
ATOM   1207  CA  PHE A 168     -29.579   5.549   6.562  1.00  0.00           C  
ATOM   1208  CB  PHE A 168     -29.475   7.063   6.801  1.00  0.00           C  
ATOM   1209  CG  PHE A 168     -28.609   7.738   5.768  1.00  0.00           C  
ATOM   1210  CD1 PHE A 168     -29.157   8.743   4.969  1.00  0.00           C  
ATOM   1211  CD2 PHE A 168     -27.265   7.395   5.607  1.00  0.00           C  
ATOM   1212  CE1 PHE A 168     -28.371   9.405   4.027  1.00  0.00           C  
ATOM   1213  CE2 PHE A 168     -26.476   8.053   4.665  1.00  0.00           C  
ATOM   1214  CZ  PHE A 168     -27.029   9.061   3.876  1.00  0.00           C  
ATOM   1215  C   PHE A 168     -28.438   4.796   7.191  1.00  0.00           C  
ATOM   1216  O   PHE A 168     -27.725   5.239   8.099  1.00  0.00           O  
ATOM   1217  N   PHE A 169     -28.245   3.526   6.704  1.00  0.00           N  
ATOM   1218  CA  PHE A 169     -27.165   2.653   7.201  1.00  0.00           C  
ATOM   1219  CB  PHE A 169     -27.764   1.278   7.558  1.00  0.00           C  
ATOM   1220  CG  PHE A 169     -28.975   1.390   8.453  1.00  0.00           C  
ATOM   1221  CD1 PHE A 169     -28.969   2.219   9.574  1.00  0.00           C  
ATOM   1222  CD2 PHE A 169     -30.129   0.668   8.164  1.00  0.00           C  
ATOM   1223  CE1 PHE A 169     -30.095   2.340  10.376  1.00  0.00           C  
ATOM   1224  CE2 PHE A 169     -31.257   0.791   8.963  1.00  0.00           C  
ATOM   1225  CZ  PHE A 169     -31.245   1.631  10.066  1.00  0.00           C  
ATOM   1226  C   PHE A 169     -26.115   2.532   6.138  1.00  0.00           C  
ATOM   1227  O   PHE A 169     -26.182   1.701   5.225  1.00  0.00           O  
ATOM   1228  N   SER A 170     -25.076   3.435   6.170  1.00  0.00           N  
ATOM   1229  CA  SER A 170     -24.128   3.482   5.043  1.00  0.00           C  
ATOM   1230  CB  SER A 170     -24.247   4.818   4.296  1.00  0.00           C  
ATOM   1231  OG  SER A 170     -23.525   5.876   4.899  1.00  0.00           O  
ATOM   1232  C   SER A 170     -22.712   3.201   5.452  1.00  0.00           C  
ATOM   1233  O   SER A 170     -22.302   3.226   6.615  1.00  0.00           O  
ATOM   1234  N   GLU A 171     -21.905   3.004   4.352  1.00  0.00           N  
ATOM   1235  CA  GLU A 171     -20.538   3.046   4.226  1.00  0.00           C  
ATOM   1236  CB  GLU A 171     -20.164   3.113   2.732  1.00  0.00           C  
ATOM   1237  CG  GLU A 171     -18.662   2.904   2.458  1.00  0.00           C  
ATOM   1238  CD  GLU A 171     -18.226   1.553   3.035  1.00  0.00           C  
ATOM   1239  OE1 GLU A 171     -18.373   0.529   2.380  1.00  0.00           O  
ATOM   1240  OE2 GLU A 171     -17.823   1.490   4.193  1.00  0.00           O1-
ATOM   1241  C   GLU A 171     -19.866   4.125   5.016  1.00  0.00           C  
ATOM   1242  O   GLU A 171     -20.229   5.281   5.081  1.00  0.00           O  
ATOM   1243  N   TRP A 172     -18.836   3.779   5.777  1.00  0.00           N  
ATOM   1244  CA  TRP A 172     -18.524   4.555   6.991  1.00  0.00           C  
ATOM   1245  CB  TRP A 172     -17.809   3.596   7.959  1.00  0.00           C  
ATOM   1246  CG  TRP A 172     -18.646   2.332   8.078  1.00  0.00           C  
ATOM   1247  CD2 TRP A 172     -18.289   0.985   7.694  1.00  0.00           C  
ATOM   1248  CE2 TRP A 172     -19.418   0.170   7.950  1.00  0.00           C  
ATOM   1249  CE3 TRP A 172     -17.155   0.427   7.168  1.00  0.00           C  
ATOM   1250  CD1 TRP A 172     -19.962   2.269   8.546  1.00  0.00           C  
ATOM   1251  NE1 TRP A 172     -20.408   0.993   8.466  1.00  0.00           N  
ATOM   1252  CZ2 TRP A 172     -19.377  -1.172   7.679  1.00  0.00           C  
ATOM   1253  CZ3 TRP A 172     -17.108  -0.940   6.888  1.00  0.00           C  
ATOM   1254  CH2 TRP A 172     -18.221  -1.742   7.147  1.00  0.00           C  
ATOM   1255  C   TRP A 172     -17.708   5.856   6.695  1.00  0.00           C  
ATOM   1256  O   TRP A 172     -18.211   6.953   6.932  1.00  0.00           O  
ATOM   1257  N   TYR A 173     -16.465   5.738   6.159  1.00  0.00           N  
ATOM   1258  CA  TYR A 173     -15.534   6.761   5.669  1.00  0.00           C  
ATOM   1259  CB  TYR A 173     -14.492   6.090   4.748  1.00  0.00           C  
ATOM   1260  CG  TYR A 173     -13.971   4.797   5.318  1.00  0.00           C  
ATOM   1261  CD1 TYR A 173     -13.049   4.800   6.359  1.00  0.00           C  
ATOM   1262  CE1 TYR A 173     -12.594   3.605   6.906  1.00  0.00           C  
ATOM   1263  CD2 TYR A 173     -14.425   3.578   4.821  1.00  0.00           C  
ATOM   1264  CE2 TYR A 173     -13.977   2.384   5.366  1.00  0.00           C  
ATOM   1265  CZ  TYR A 173     -13.065   2.391   6.411  1.00  0.00           C  
ATOM   1266  OH  TYR A 173     -12.653   1.178   6.929  1.00  0.00           O  
ATOM   1267  C   TYR A 173     -16.277   7.833   4.858  1.00  0.00           C  
ATOM   1268  O   TYR A 173     -15.899   9.004   4.907  1.00  0.00           O  
ATOM   1269  N   ILE A 174     -17.329   7.422   4.117  1.00  0.00           N  
ATOM   1270  CA  ILE A 174     -18.175   8.312   3.319  1.00  0.00           C  
ATOM   1271  CB  ILE A 174     -18.704   7.679   2.013  1.00  0.00           C  
ATOM   1272  CG2 ILE A 174     -17.518   7.208   1.156  1.00  0.00           C  
ATOM   1273  CG1 ILE A 174     -19.701   6.526   2.188  1.00  0.00           C  
ATOM   1274  CD1 ILE A 174     -21.150   6.962   2.436  1.00  0.00           C  
ATOM   1275  C   ILE A 174     -19.183   9.025   4.221  1.00  0.00           C  
ATOM   1276  O   ILE A 174     -19.473  10.197   3.987  1.00  0.00           O  
ATOM   1277  N   LEU A 175     -19.714   8.316   5.242  1.00  0.00           N  
ATOM   1278  CA  LEU A 175     -20.663   8.846   6.222  1.00  0.00           C  
ATOM   1279  CB  LEU A 175     -21.244   7.750   7.136  1.00  0.00           C  
ATOM   1280  CG  LEU A 175     -22.430   8.244   7.981  1.00  0.00           C  
ATOM   1281  CD1 LEU A 175     -23.615   8.661   7.098  1.00  0.00           C  
ATOM   1282  CD2 LEU A 175     -22.865   7.153   8.964  1.00  0.00           C  
ATOM   1283  C   LEU A 175     -20.079  10.038   6.991  1.00  0.00           C  
ATOM   1284  O   LEU A 175     -20.822  10.961   7.320  1.00  0.00           O  
ATOM   1285  N   ALA A 176     -18.758  10.017   7.275  1.00  0.00           N  
ATOM   1286  CA  ALA A 176     -18.067  11.098   7.995  1.00  0.00           C  
ATOM   1287  CB  ALA A 176     -16.812  10.500   8.642  1.00  0.00           C  
ATOM   1288  C   ALA A 176     -17.661  12.252   7.084  1.00  0.00           C  
ATOM   1289  O   ALA A 176     -17.564  13.385   7.550  1.00  0.00           O  
ATOM   1290  N   ILE A 177     -17.418  11.963   5.795  1.00  0.00           N  
ATOM   1291  CA  ILE A 177     -17.040  12.971   4.809  1.00  0.00           C  
ATOM   1292  CB  ILE A 177     -16.285  12.348   3.602  1.00  0.00           C  
ATOM   1293  CG2 ILE A 177     -17.181  11.980   2.405  1.00  0.00           C  
ATOM   1294  CG1 ILE A 177     -15.148  13.266   3.108  1.00  0.00           C  
ATOM   1295  CD1 ILE A 177     -13.949  13.334   4.065  1.00  0.00           C  
ATOM   1296  C   ILE A 177     -18.249  13.834   4.407  1.00  0.00           C  
ATOM   1297  O   ILE A 177     -18.080  15.026   4.155  1.00  0.00           O  
ATOM   1298  N   THR A 178     -19.463  13.242   4.368  1.00  0.00           N  
ATOM   1299  CA  THR A 178     -20.698  13.977   4.065  1.00  0.00           C  
ATOM   1300  CB  THR A 178     -21.793  13.032   3.532  1.00  0.00           C  
ATOM   1301  OG1 THR A 178     -22.053  11.958   4.439  1.00  0.00           O  
ATOM   1302  CG2 THR A 178     -21.440  12.495   2.139  1.00  0.00           C  
ATOM   1303  C   THR A 178     -21.191  14.709   5.315  1.00  0.00           C  
ATOM   1304  O   THR A 178     -21.935  15.684   5.196  1.00  0.00           O  
ATOM   1305  N   SER A 179     -20.776  14.236   6.509  1.00  0.00           N  
ATOM   1306  CA  SER A 179     -21.105  14.847   7.793  1.00  0.00           C  
ATOM   1307  CB  SER A 179     -20.703  13.965   8.979  1.00  0.00           C  
ATOM   1308  OG  SER A 179     -21.593  12.862   9.108  1.00  0.00           O  
ATOM   1309  C   SER A 179     -20.433  16.216   7.883  1.00  0.00           C  
ATOM   1310  O   SER A 179     -21.064  17.169   8.326  1.00  0.00           O  
ATOM   1311  N   PHE A 180     -19.178  16.323   7.412  1.00  0.00           N  
ATOM   1312  CA  PHE A 180     -18.439  17.583   7.426  1.00  0.00           C  
ATOM   1313  CB  PHE A 180     -16.950  17.176   7.353  1.00  0.00           C  
ATOM   1314  CG  PHE A 180     -15.986  18.312   7.120  1.00  0.00           C  
ATOM   1315  CD1 PHE A 180     -15.496  18.562   5.841  1.00  0.00           C  
ATOM   1316  CD2 PHE A 180     -15.557  19.116   8.171  1.00  0.00           C  
ATOM   1317  CE1 PHE A 180     -14.594  19.592   5.616  1.00  0.00           C  
ATOM   1318  CE2 PHE A 180     -14.664  20.157   7.949  1.00  0.00           C  
ATOM   1319  CZ  PHE A 180     -14.179  20.395   6.670  1.00  0.00           C  
ATOM   1320  C   PHE A 180     -18.829  18.473   6.247  1.00  0.00           C  
ATOM   1321  O   PHE A 180     -19.285  19.591   6.476  1.00  0.00           O  
ATOM   1322  N   LEU A 181     -18.694  17.967   5.001  1.00  0.00           N  
ATOM   1323  CA  LEU A 181     -19.028  18.683   3.758  1.00  0.00           C  
ATOM   1324  CB  LEU A 181     -18.913  17.715   2.566  1.00  0.00           C  
ATOM   1325  CG  LEU A 181     -17.471  17.275   2.244  1.00  0.00           C  
ATOM   1326  CD1 LEU A 181     -17.479  16.127   1.224  1.00  0.00           C  
ATOM   1327  CD2 LEU A 181     -16.610  18.439   1.730  1.00  0.00           C  
ATOM   1328  C   LEU A 181     -20.436  19.315   3.770  1.00  0.00           C  
ATOM   1329  O   LEU A 181     -20.578  20.474   3.374  1.00  0.00           O  
ATOM   1330  N   GLU A 182     -21.449  18.582   4.270  1.00  0.00           N  
ATOM   1331  CA  GLU A 182     -22.831  19.074   4.325  1.00  0.00           C  
ATOM   1332  CB  GLU A 182     -23.682  17.841   3.955  1.00  0.00           C  
ATOM   1333  CG  GLU A 182     -25.198  18.038   3.877  1.00  0.00           C  
ATOM   1334  CD  GLU A 182     -25.863  16.691   3.894  1.00  0.00           C  
ATOM   1335  OE1 GLU A 182     -25.969  16.057   2.798  1.00  0.00           O  
ATOM   1336  OE2 GLU A 182     -26.270  16.231   5.006  1.00  0.00           O1-
ATOM   1337  C   GLU A 182     -23.289  19.705   5.662  1.00  0.00           C  
ATOM   1338  O   GLU A 182     -24.347  20.336   5.693  1.00  0.00           O  
ATOM   1339  N   PHE A 183     -22.501  19.565   6.748  1.00  0.00           N  
ATOM   1340  CA  PHE A 183     -22.871  20.152   8.037  1.00  0.00           C  
ATOM   1341  CB  PHE A 183     -23.605  19.152   8.937  1.00  0.00           C  
ATOM   1342  CG  PHE A 183     -24.411  19.856   9.989  1.00  0.00           C  
ATOM   1343  CD1 PHE A 183     -25.537  20.597   9.626  1.00  0.00           C  
ATOM   1344  CD2 PHE A 183     -24.042  19.772  11.332  1.00  0.00           C  
ATOM   1345  CE1 PHE A 183     -26.289  21.252  10.599  1.00  0.00           C  
ATOM   1346  CE2 PHE A 183     -24.794  20.426  12.307  1.00  0.00           C  
ATOM   1347  CZ  PHE A 183     -25.916  21.167  11.940  1.00  0.00           C  
ATOM   1348  C   PHE A 183     -21.731  20.855   8.770  1.00  0.00           C  
ATOM   1349  O   PHE A 183     -21.834  22.061   8.963  1.00  0.00           O  
ATOM   1350  N   VAL A 184     -20.666  20.130   9.186  1.00  0.00           N  
ATOM   1351  CA  VAL A 184     -19.532  20.700   9.938  1.00  0.00           C  
ATOM   1352  CB  VAL A 184     -18.603  19.641  10.570  1.00  0.00           C  
ATOM   1353  CG1 VAL A 184     -17.709  20.246  11.662  1.00  0.00           C  
ATOM   1354  CG2 VAL A 184     -19.389  18.451  11.146  1.00  0.00           C  
ATOM   1355  C   VAL A 184     -18.788  21.844   9.238  1.00  0.00           C  
ATOM   1356  O   VAL A 184     -18.384  22.798   9.903  1.00  0.00           O  
ATOM   1357  N   ILE A 185     -18.632  21.752   7.900  1.00  0.00           N  
ATOM   1358  CA  ILE A 185     -17.998  22.788   7.086  1.00  0.00           C  
ATOM   1359  CB  ILE A 185     -17.251  22.333   5.810  1.00  0.00           C  
ATOM   1360  CG2 ILE A 185     -18.149  22.039   4.613  1.00  0.00           C  
ATOM   1361  CG1 ILE A 185     -16.170  23.372   5.439  1.00  0.00           C  
ATOM   1362  CD1 ILE A 185     -15.362  23.039   4.179  1.00  0.00           C  
ATOM   1363  C   ILE A 185     -18.930  24.016   6.980  1.00  0.00           C  
ATOM   1364  O   ILE A 185     -18.497  25.071   7.448  1.00  0.00           O  
ATOM   1365  N   PRO A 186     -20.207  23.933   6.477  1.00  0.00           N  
ATOM   1366  CD  PRO A 186     -20.898  22.762   5.931  1.00  0.00           C  
ATOM   1367  CA  PRO A 186     -21.053  25.143   6.471  1.00  0.00           C  
ATOM   1368  CB  PRO A 186     -22.385  24.670   5.857  1.00  0.00           C  
ATOM   1369  CG  PRO A 186     -22.377  23.146   5.972  1.00  0.00           C  
ATOM   1370  C   PRO A 186     -21.285  25.750   7.861  1.00  0.00           C  
ATOM   1371  O   PRO A 186     -21.035  26.940   8.002  1.00  0.00           O  
ATOM   1372  N   VAL A 187     -21.653  24.944   8.898  1.00  0.00           N  
ATOM   1373  CA  VAL A 187     -21.866  25.453  10.264  1.00  0.00           C  
ATOM   1374  CB  VAL A 187     -22.402  24.407  11.252  1.00  0.00           C  
ATOM   1375  CG1 VAL A 187     -23.722  23.794  10.763  1.00  0.00           C  
ATOM   1376  CG2 VAL A 187     -21.346  23.364  11.620  1.00  0.00           C  
ATOM   1377  C   VAL A 187     -20.705  26.243  10.865  1.00  0.00           C  
ATOM   1378  O   VAL A 187     -20.949  27.111  11.697  1.00  0.00           O  
ATOM   1379  N   ILE A 188     -19.461  25.946  10.465  1.00  0.00           N  
ATOM   1380  CA  ILE A 188     -18.297  26.671  10.967  1.00  0.00           C  
ATOM   1381  CB  ILE A 188     -17.054  25.750  10.916  1.00  0.00           C  
ATOM   1382  CG2 ILE A 188     -15.731  26.521  11.107  1.00  0.00           C  
ATOM   1383  CG1 ILE A 188     -17.184  24.644  11.984  1.00  0.00           C  
ATOM   1384  CD1 ILE A 188     -16.088  23.574  11.909  1.00  0.00           C  
ATOM   1385  C   ILE A 188     -18.093  27.989  10.207  1.00  0.00           C  
ATOM   1386  O   ILE A 188     -17.823  29.014  10.836  1.00  0.00           O  
ATOM   1387  N   LEU A 189     -18.261  27.965   8.864  1.00  0.00           N  
ATOM   1388  CA  LEU A 189     -18.145  29.136   7.984  1.00  0.00           C  
ATOM   1389  CB  LEU A 189     -18.189  28.649   6.524  1.00  0.00           C  
ATOM   1390  CG  LEU A 189     -17.012  27.739   6.125  1.00  0.00           C  
ATOM   1391  CD1 LEU A 189     -17.272  27.101   4.755  1.00  0.00           C  
ATOM   1392  CD2 LEU A 189     -15.679  28.501   6.117  1.00  0.00           C  
ATOM   1393  C   LEU A 189     -19.307  30.094   8.218  1.00  0.00           C  
ATOM   1394  O   LEU A 189     -19.121  31.306   8.165  1.00  0.00           O  
ATOM   1395  N   VAL A 190     -20.496  29.540   8.498  1.00  0.00           N  
ATOM   1396  CA  VAL A 190     -21.725  30.267   8.791  1.00  0.00           C  
ATOM   1397  CB  VAL A 190     -23.024  29.426   8.738  1.00  0.00           C  
ATOM   1398  CG1 VAL A 190     -23.431  28.794  10.076  1.00  0.00           C  
ATOM   1399  CG2 VAL A 190     -24.191  30.280   8.210  1.00  0.00           C  
ATOM   1400  C   VAL A 190     -21.535  31.056  10.070  1.00  0.00           C  
ATOM   1401  O   VAL A 190     -21.865  32.240  10.101  1.00  0.00           O  
ATOM   1402  N   ALA A 191     -20.983  30.391  11.118  1.00  0.00           N  
ATOM   1403  CA  ALA A 191     -20.671  30.975  12.427  1.00  0.00           C  
ATOM   1404  CB  ALA A 191     -20.137  29.865  13.341  1.00  0.00           C  
ATOM   1405  C   ALA A 191     -19.626  32.089  12.274  1.00  0.00           C  
ATOM   1406  O   ALA A 191     -19.844  33.184  12.792  1.00  0.00           O  
ATOM   1407  N   TYR A 192     -18.534  31.826  11.503  1.00  0.00           N  
ATOM   1408  CA  TYR A 192     -17.442  32.768  11.202  1.00  0.00           C  
ATOM   1409  CB  TYR A 192     -16.485  32.061  10.221  1.00  0.00           C  
ATOM   1410  CG  TYR A 192     -15.529  33.006   9.541  1.00  0.00           C  
ATOM   1411  CD1 TYR A 192     -14.472  33.573  10.245  1.00  0.00           C  
ATOM   1412  CE1 TYR A 192     -13.613  34.473   9.627  1.00  0.00           C  
ATOM   1413  CD2 TYR A 192     -15.710  33.342   8.202  1.00  0.00           C  
ATOM   1414  CE2 TYR A 192     -14.852  34.240   7.582  1.00  0.00           C  
ATOM   1415  CZ  TYR A 192     -13.805  34.809   8.291  1.00  0.00           C  
ATOM   1416  OH  TYR A 192     -12.981  35.707   7.641  1.00  0.00           O  
ATOM   1417  C   TYR A 192     -17.970  34.075  10.598  1.00  0.00           C  
ATOM   1418  O   TYR A 192     -17.537  35.154  11.012  1.00  0.00           O  
ATOM   1419  N   PHE A 193     -18.913  33.969   9.642  1.00  0.00           N  
ATOM   1420  CA  PHE A 193     -19.545  35.105   8.972  1.00  0.00           C  
ATOM   1421  CB  PHE A 193     -20.402  34.606   7.783  1.00  0.00           C  
ATOM   1422  CG  PHE A 193     -19.637  34.088   6.586  1.00  0.00           C  
ATOM   1423  CD1 PHE A 193     -18.508  34.740   6.093  1.00  0.00           C  
ATOM   1424  CD2 PHE A 193     -20.080  32.942   5.929  1.00  0.00           C  
ATOM   1425  CE1 PHE A 193     -17.837  34.254   4.977  1.00  0.00           C  
ATOM   1426  CE2 PHE A 193     -19.414  32.454   4.813  1.00  0.00           C  
ATOM   1427  CZ  PHE A 193     -18.289  33.110   4.335  1.00  0.00           C  
ATOM   1428  C   PHE A 193     -20.491  35.853   9.911  1.00  0.00           C  
ATOM   1429  O   PHE A 193     -20.515  37.085   9.885  1.00  0.00           O  
ATOM   1430  N   ASN A 194     -21.258  35.112  10.744  1.00  0.00           N  
ATOM   1431  CA  ASN A 194     -22.193  35.692  11.711  1.00  0.00           C  
ATOM   1432  CB  ASN A 194     -23.044  34.550  12.300  1.00  0.00           C  
ATOM   1433  CG  ASN A 194     -24.130  35.083  13.250  1.00  0.00           C  
ATOM   1434  OD1 ASN A 194     -25.103  35.696  12.833  1.00  0.00           O  
ATOM   1435  ND2 ASN A 194     -23.912  34.821  14.545  1.00  0.00           N  
ATOM   1436  C   ASN A 194     -21.464  36.434  12.831  1.00  0.00           C  
ATOM   1437  O   ASN A 194     -21.929  37.493  13.259  1.00  0.00           O  
ATOM   1438  N   MET A 195     -20.315  35.888  13.287  1.00  0.00           N  
ATOM   1439  CA  MET A 195     -19.444  36.494  14.301  1.00  0.00           C  
ATOM   1440  CB  MET A 195     -18.295  35.524  14.622  1.00  0.00           C  
ATOM   1441  CG  MET A 195     -18.754  34.345  15.489  1.00  0.00           C  
ATOM   1442  SD  MET A 195     -17.452  33.114  15.675  1.00  0.00           S  
ATOM   1443  CE  MET A 195     -18.383  31.890  16.612  1.00  0.00           C  
ATOM   1444  C   MET A 195     -18.880  37.816  13.766  1.00  0.00           C  
ATOM   1445  O   MET A 195     -18.447  38.661  14.548  1.00  0.00           O  
ATOM   1446  N   ASN A 196     -18.905  37.993  12.428  1.00  0.00           N  
ATOM   1447  CA  ASN A 196     -18.495  39.211  11.740  1.00  0.00           C  
ATOM   1448  CB  ASN A 196     -17.943  38.927  10.335  1.00  0.00           C  
ATOM   1449  CG  ASN A 196     -16.517  38.366  10.316  1.00  0.00           C  
ATOM   1450  OD1 ASN A 196     -15.940  38.007  11.332  1.00  0.00           O  
ATOM   1451  ND2 ASN A 196     -15.984  38.311   9.086  1.00  0.00           N  
ATOM   1452  C   ASN A 196     -19.694  40.183  11.632  1.00  0.00           C  
ATOM   1453  O   ASN A 196     -19.507  41.388  11.813  1.00  0.00           O  
ATOM   1454  N   ILE A 197     -20.921  39.652  11.362  1.00  0.00           N  
ATOM   1455  CA  ILE A 197     -22.172  40.432  11.287  1.00  0.00           C  
ATOM   1456  CB  ILE A 197     -23.361  39.551  10.824  1.00  0.00           C  
ATOM   1457  CG2 ILE A 197     -24.715  40.283  10.964  1.00  0.00           C  
ATOM   1458  CG1 ILE A 197     -23.158  39.094   9.366  1.00  0.00           C  
ATOM   1459  CD1 ILE A 197     -24.201  38.080   8.874  1.00  0.00           C  
ATOM   1460  C   ILE A 197     -22.446  41.050  12.668  1.00  0.00           C  
ATOM   1461  O   ILE A 197     -22.684  42.252  12.756  1.00  0.00           O  
ATOM   1462  N   TYR A 198     -22.355  40.223  13.737  1.00  0.00           N  
ATOM   1463  CA  TYR A 198     -22.545  40.619  15.134  1.00  0.00           C  
ATOM   1464  CB  TYR A 198     -22.580  39.367  16.028  1.00  0.00           C  
ATOM   1465  CG  TYR A 198     -23.572  39.565  17.143  1.00  0.00           C  
ATOM   1466  CD1 TYR A 198     -24.915  39.266  16.930  1.00  0.00           C  
ATOM   1467  CE1 TYR A 198     -25.855  39.492  17.924  1.00  0.00           C  
ATOM   1468  CD2 TYR A 198     -23.179  40.076  18.376  1.00  0.00           C  
ATOM   1469  CE2 TYR A 198     -24.118  40.298  19.375  1.00  0.00           C  
ATOM   1470  CZ  TYR A 198     -25.457  40.015  19.145  1.00  0.00           C  
ATOM   1471  OH  TYR A 198     -26.397  40.264  20.121  1.00  0.00           O  
ATOM   1472  C   TYR A 198     -21.499  41.628  15.630  1.00  0.00           C  
ATOM   1473  O   TYR A 198     -21.756  42.323  16.608  1.00  0.00           O  
ATOM   1474  N   TRP A 199     -20.332  41.709  14.952  1.00  0.00           N  
ATOM   1475  CA  TRP A 199     -19.250  42.647  15.275  1.00  0.00           C  
ATOM   1476  CB  TRP A 199     -17.933  41.977  14.847  1.00  0.00           C  
ATOM   1477  CG  TRP A 199     -16.733  42.757  15.337  1.00  0.00           C  
ATOM   1478  CD2 TRP A 199     -16.309  42.959  16.703  1.00  0.00           C  
ATOM   1479  CE2 TRP A 199     -15.140  43.754  16.655  1.00  0.00           C  
ATOM   1480  CE3 TRP A 199     -16.808  42.546  17.910  1.00  0.00           C  
ATOM   1481  CD1 TRP A 199     -15.813  43.430  14.531  1.00  0.00           C  
ATOM   1482  NE1 TRP A 199     -14.876  44.015  15.315  1.00  0.00           N  
ATOM   1483  CZ2 TRP A 199     -14.508  44.113  17.815  1.00  0.00           C  
ATOM   1484  CZ3 TRP A 199     -16.166  42.910  19.094  1.00  0.00           C  
ATOM   1485  CH2 TRP A 199     -15.014  43.695  19.046  1.00  0.00           C  
ATOM   1486  C   TRP A 199     -19.451  43.998  14.591  1.00  0.00           C  
ATOM   1487  O   TRP A 199     -18.820  44.970  14.997  1.00  0.00           O  
ATOM   1488  N   SER A 200     -20.342  44.060  13.577  1.00  0.00           N  
ATOM   1489  CA  SER A 200     -20.643  45.268  12.801  1.00  0.00           C  
ATOM   1490  CB  SER A 200     -21.019  44.864  11.355  1.00  0.00           C  
ATOM   1491  OG  SER A 200     -20.909  43.479  11.074  1.00  0.00           O  
ATOM   1492  C   SER A 200     -21.753  46.118  13.429  1.00  0.00           C  
ATOM   1493  O   SER A 200     -21.689  47.348  13.349  1.00  0.00           O  
ATOM   1494  N   LEU A 201     -22.758  45.476  14.048  1.00  0.00           N  
ATOM   1495  CA  LEU A 201     -23.914  46.149  14.668  1.00  0.00           C  
ATOM   1496  CB  LEU A 201     -25.192  45.720  13.904  1.00  0.00           C  
ATOM   1497  CG  LEU A 201     -25.196  44.273  13.353  1.00  0.00           C  
ATOM   1498  CD1 LEU A 201     -25.290  43.229  14.472  1.00  0.00           C  
ATOM   1499  CD2 LEU A 201     -26.299  44.067  12.309  1.00  0.00           C  
ATOM   1500  C   LEU A 201     -23.952  45.890  16.199  1.00  0.00           C  
ATOM   1501  O   LEU A 201     -25.023  45.636  16.761  1.00  0.00           O  
ATOM   1502  N   TRP A 202     -22.806  46.062  16.865  1.00  0.00           N  
ATOM   1503  CA  TRP A 202     -22.705  45.821  18.312  1.00  0.00           C  
ATOM   1504  CB  TRP A 202     -21.993  44.485  18.543  1.00  0.00           C  
ATOM   1505  CG  TRP A 202     -21.936  44.081  20.002  1.00  0.00           C  
ATOM   1506  CD2 TRP A 202     -20.784  44.087  20.871  1.00  0.00           C  
ATOM   1507  CE2 TRP A 202     -21.215  43.595  22.125  1.00  0.00           C  
ATOM   1508  CE3 TRP A 202     -19.477  44.450  20.689  1.00  0.00           C  
ATOM   1509  CD1 TRP A 202     -23.008  43.610  20.765  1.00  0.00           C  
ATOM   1510  NE1 TRP A 202     -22.574  43.322  22.016  1.00  0.00           N  
ATOM   1511  CZ2 TRP A 202     -20.321  43.472  23.154  1.00  0.00           C  
ATOM   1512  CZ3 TRP A 202     -18.563  44.328  21.736  1.00  0.00           C  
ATOM   1513  CH2 TRP A 202     -18.986  43.834  22.970  1.00  0.00           C  
ATOM   1514  C   TRP A 202     -22.152  46.959  19.201  1.00  0.00           C  
ATOM   1515  O   TRP A 202     -20.964  46.990  19.523  1.00  0.00           O  
ATOM   1516  N   HIS A 292     -31.327  54.529  21.117  1.00  0.00           N  
ATOM   1517  CA  HIS A 292     -30.755  55.583  20.259  1.00  0.00           C  
ATOM   1518  CB  HIS A 292     -30.387  56.818  21.101  1.00  0.00           C  
ATOM   1519  CG  HIS A 292     -29.960  57.969  20.215  1.00  0.00           C  
ATOM   1520  CD2 HIS A 292     -30.643  59.169  19.962  1.00  0.00           C  
ATOM   1521  ND1 HIS A 292     -28.805  57.983  19.518  1.00  0.00           N  
ATOM   1522  CE1 HIS A 292     -28.781  59.156  18.863  1.00  0.00           C  
ATOM   1523  NE2 HIS A 292     -29.879  59.893  19.111  1.00  0.00           N  
ATOM   1524  C   HIS A 292     -29.562  55.050  19.509  1.00  0.00           C  
ATOM   1525  O   HIS A 292     -28.391  55.305  19.816  1.00  0.00           O  
ATOM   1526  N   VAL A 293     -29.836  54.220  18.444  1.00  0.00           N  
ATOM   1527  CA  VAL A 293     -28.756  53.611  17.634  1.00  0.00           C  
ATOM   1528  CB  VAL A 293     -28.679  52.094  17.920  1.00  0.00           C  
ATOM   1529  CG1 VAL A 293     -28.462  51.815  19.414  1.00  0.00           C  
ATOM   1530  CG2 VAL A 293     -29.895  51.314  17.396  1.00  0.00           C  
ATOM   1531  C   VAL A 293     -28.952  53.904  16.173  1.00  0.00           C  
ATOM   1532  O   VAL A 293     -29.960  54.456  15.717  1.00  0.00           O  
ATOM   1533  N   GLU A 294     -27.935  53.495  15.341  1.00  0.00           N  
ATOM   1534  CA  GLU A 294     -28.044  53.509  13.869  1.00  0.00           C  
ATOM   1535  CB  GLU A 294     -26.710  53.990  13.254  1.00  0.00           C  
ATOM   1536  CG  GLU A 294     -25.473  53.104  13.528  1.00  0.00           C  
ATOM   1537  CD  GLU A 294     -24.955  53.237  14.968  1.00  0.00           C  
ATOM   1538  OE1 GLU A 294     -25.176  52.322  15.762  1.00  0.00           O  
ATOM   1539  OE2 GLU A 294     -24.363  54.259  15.290  1.00  0.00           O1-
ATOM   1540  C   GLU A 294     -28.401  52.130  13.381  1.00  0.00           C  
ATOM   1541  O   GLU A 294     -28.402  51.164  14.156  1.00  0.00           O  
ATOM   1542  N   LEU A 295     -28.676  51.984  12.026  1.00  0.00           N  
ATOM   1543  CA  LEU A 295     -28.805  50.700  11.313  1.00  0.00           C  
ATOM   1544  CB  LEU A 295     -27.417  50.023  11.249  1.00  0.00           C  
ATOM   1545  CG  LEU A 295     -26.326  50.859  10.557  1.00  0.00           C  
ATOM   1546  CD1 LEU A 295     -24.943  50.244  10.807  1.00  0.00           C  
ATOM   1547  CD2 LEU A 295     -26.587  50.997   9.051  1.00  0.00           C  
ATOM   1548  C   LEU A 295     -29.781  49.800  12.063  1.00  0.00           C  
ATOM   1549  O   LEU A 295     -29.482  48.623  12.267  1.00  0.00           O  
ATOM   1550  N   LEU A 296     -30.913  50.350  12.529  1.00  0.00           N  
ATOM   1551  CA  LEU A 296     -31.860  49.537  13.291  1.00  0.00           C  
ATOM   1552  CB  LEU A 296     -33.034  50.410  13.787  1.00  0.00           C  
ATOM   1553  CG  LEU A 296     -32.684  51.489  14.827  1.00  0.00           C  
ATOM   1554  CD1 LEU A 296     -32.053  52.737  14.197  1.00  0.00           C  
ATOM   1555  CD2 LEU A 296     -33.936  51.894  15.619  1.00  0.00           C  
ATOM   1556  C   LEU A 296     -32.505  48.387  12.485  1.00  0.00           C  
ATOM   1557  O   LEU A 296     -32.822  47.345  13.070  1.00  0.00           O  
ATOM   1558  N   ARG A 297     -32.615  48.553  11.137  1.00  0.00           N  
ATOM   1559  CA  ARG A 297     -33.158  47.537  10.224  1.00  0.00           C  
ATOM   1560  CB  ARG A 297     -33.242  48.212   8.832  1.00  0.00           C  
ATOM   1561  CG  ARG A 297     -34.204  49.417   8.771  1.00  0.00           C  
ATOM   1562  CD  ARG A 297     -33.730  50.557   7.850  1.00  0.00           C  
ATOM   1563  NE  ARG A 297     -33.620  50.133   6.453  1.00  0.00           N1+
ATOM   1564  CZ  ARG A 297     -33.256  51.000   5.471  1.00  0.00           C  
ATOM   1565  NH1 ARG A 297     -32.967  52.266   5.768  1.00  0.00           N  
ATOM   1566  NH2 ARG A 297     -33.182  50.582   4.208  1.00  0.00           N  
ATOM   1567  C   ARG A 297     -32.227  46.335  10.113  1.00  0.00           C  
ATOM   1568  O   ARG A 297     -32.715  45.206  10.118  1.00  0.00           O  
ATOM   1569  N   ALA A 298     -30.895  46.574  10.046  1.00  0.00           N  
ATOM   1570  CA  ALA A 298     -29.854  45.533  10.012  1.00  0.00           C  
ATOM   1571  CB  ALA A 298     -28.498  46.185   9.716  1.00  0.00           C  
ATOM   1572  C   ALA A 298     -29.819  44.832  11.373  1.00  0.00           C  
ATOM   1573  O   ALA A 298     -29.853  43.602  11.433  1.00  0.00           O  
ATOM   1574  N   ARG A 299     -29.789  45.635  12.461  1.00  0.00           N  
ATOM   1575  CA  ARG A 299     -29.797  45.225  13.866  1.00  0.00           C  
ATOM   1576  CB  ARG A 299     -29.825  46.457  14.784  1.00  0.00           C  
ATOM   1577  CG  ARG A 299     -28.986  46.244  16.056  1.00  0.00           C  
ATOM   1578  CD  ARG A 299     -28.834  47.511  16.903  1.00  0.00           C  
ATOM   1579  NE  ARG A 299     -28.219  48.600  16.142  1.00  0.00           N1+
ATOM   1580  CZ  ARG A 299     -26.918  48.960  16.221  1.00  0.00           C  
ATOM   1581  NH1 ARG A 299     -26.007  48.199  16.818  1.00  0.00           N  
ATOM   1582  NH2 ARG A 299     -26.567  50.116  15.683  1.00  0.00           N  
ATOM   1583  C   ARG A 299     -30.932  44.228  14.095  1.00  0.00           C  
ATOM   1584  O   ARG A 299     -30.684  43.134  14.598  1.00  0.00           O  
ATOM   1585  N   ARG A 300     -32.163  44.596  13.669  1.00  0.00           N  
ATOM   1586  CA  ARG A 300     -33.364  43.768  13.762  1.00  0.00           C  
ATOM   1587  CB  ARG A 300     -34.648  44.499  13.339  1.00  0.00           C  
ATOM   1588  CG  ARG A 300     -35.886  43.575  13.440  1.00  0.00           C  
ATOM   1589  CD  ARG A 300     -37.205  44.306  13.719  1.00  0.00           C  
ATOM   1590  NE  ARG A 300     -37.198  44.856  15.073  1.00  0.00           N1+
ATOM   1591  CZ  ARG A 300     -37.598  44.180  16.179  1.00  0.00           C  
ATOM   1592  NH1 ARG A 300     -38.075  42.936  16.100  1.00  0.00           N  
ATOM   1593  NH2 ARG A 300     -37.511  44.781  17.365  1.00  0.00           N  
ATOM   1594  C   ARG A 300     -33.166  42.454  12.983  1.00  0.00           C  
ATOM   1595  O   ARG A 300     -33.276  41.372  13.573  1.00  0.00           O  
ATOM   1596  N   LEU A 301     -32.795  42.561  11.681  1.00  0.00           N  
ATOM   1597  CA  LEU A 301     -32.530  41.440  10.767  1.00  0.00           C  
ATOM   1598  CB  LEU A 301     -32.123  41.988   9.385  1.00  0.00           C  
ATOM   1599  CG  LEU A 301     -33.282  42.605   8.578  1.00  0.00           C  
ATOM   1600  CD1 LEU A 301     -32.737  43.421   7.398  1.00  0.00           C  
ATOM   1601  CD2 LEU A 301     -34.263  41.537   8.073  1.00  0.00           C  
ATOM   1602  C   LEU A 301     -31.429  40.477  11.249  1.00  0.00           C  
ATOM   1603  O   LEU A 301     -31.495  39.284  10.934  1.00  0.00           O  
ATOM   1604  N   ALA A 302     -30.428  40.993  12.003  1.00  0.00           N  
ATOM   1605  CA  ALA A 302     -29.318  40.220  12.566  1.00  0.00           C  
ATOM   1606  CB  ALA A 302     -28.247  41.194  13.065  1.00  0.00           C  
ATOM   1607  C   ALA A 302     -29.791  39.318  13.710  1.00  0.00           C  
ATOM   1608  O   ALA A 302     -29.339  38.175  13.803  1.00  0.00           O  
ATOM   1609  N   LYS A 303     -30.707  39.824  14.568  1.00  0.00           N  
ATOM   1610  CA  LYS A 303     -31.296  39.071  15.677  1.00  0.00           C  
ATOM   1611  CB  LYS A 303     -32.267  39.956  16.486  1.00  0.00           C  
ATOM   1612  CG  LYS A 303     -32.942  39.213  17.664  1.00  0.00           C  
ATOM   1613  CD  LYS A 303     -34.365  39.712  17.957  1.00  0.00           C  
ATOM   1614  CE  LYS A 303     -35.108  38.845  18.987  1.00  0.00           C  
ATOM   1615  NZ  LYS A 303     -35.395  37.487  18.511  1.00  0.00           N1+
ATOM   1616  C   LYS A 303     -32.106  37.920  15.078  1.00  0.00           C  
ATOM   1617  O   LYS A 303     -32.001  36.794  15.565  1.00  0.00           O  
ATOM   1618  N   SER A 304     -32.870  38.198  13.993  1.00  0.00           N  
ATOM   1619  CA  SER A 304     -33.668  37.200  13.279  1.00  0.00           C  
ATOM   1620  CB  SER A 304     -34.545  37.848  12.189  1.00  0.00           C  
ATOM   1621  OG  SER A 304     -33.899  38.131  10.961  1.00  0.00           O  
ATOM   1622  C   SER A 304     -32.773  36.107  12.701  1.00  0.00           C  
ATOM   1623  O   SER A 304     -33.096  34.938  12.891  1.00  0.00           O  
ATOM   1624  N   LEU A 305     -31.652  36.478  12.023  1.00  0.00           N  
ATOM   1625  CA  LEU A 305     -30.697  35.516  11.460  1.00  0.00           C  
ATOM   1626  CB  LEU A 305     -29.590  36.362  10.807  1.00  0.00           C  
ATOM   1627  CG  LEU A 305     -28.537  35.564  10.023  1.00  0.00           C  
ATOM   1628  CD1 LEU A 305     -29.207  34.709   8.936  1.00  0.00           C  
ATOM   1629  CD2 LEU A 305     -27.497  36.533   9.440  1.00  0.00           C  
ATOM   1630  C   LEU A 305     -30.106  34.637  12.561  1.00  0.00           C  
ATOM   1631  O   LEU A 305     -30.071  33.412  12.406  1.00  0.00           O  
ATOM   1632  N   ALA A 306     -29.708  35.263  13.669  1.00  0.00           N  
ATOM   1633  CA  ALA A 306     -29.185  34.580  14.848  1.00  0.00           C  
ATOM   1634  CB  ALA A 306     -28.800  35.639  15.890  1.00  0.00           C  
ATOM   1635  C   ALA A 306     -30.174  33.596  15.443  1.00  0.00           C  
ATOM   1636  O   ALA A 306     -29.783  32.503  15.842  1.00  0.00           O  
ATOM   1637  N   ILE A 307     -31.464  33.968  15.480  1.00  0.00           N  
ATOM   1638  CA  ILE A 307     -32.549  33.130  15.983  1.00  0.00           C  
ATOM   1639  CB  ILE A 307     -33.831  33.992  16.034  1.00  0.00           C  
ATOM   1640  CG2 ILE A 307     -35.138  33.186  16.080  1.00  0.00           C  
ATOM   1641  CG1 ILE A 307     -33.757  35.017  17.182  1.00  0.00           C  
ATOM   1642  CD1 ILE A 307     -34.224  34.479  18.542  1.00  0.00           C  
ATOM   1643  C   ILE A 307     -32.673  31.894  15.080  1.00  0.00           C  
ATOM   1644  O   ILE A 307     -32.703  30.775  15.598  1.00  0.00           O  
ATOM   1645  N   LEU A 308     -32.682  32.097  13.731  1.00  0.00           N  
ATOM   1646  CA  LEU A 308     -32.745  31.041  12.705  1.00  0.00           C  
ATOM   1647  CB  LEU A 308     -32.721  31.687  11.302  1.00  0.00           C  
ATOM   1648  CG  LEU A 308     -34.117  31.842  10.668  1.00  0.00           C  
ATOM   1649  CD1 LEU A 308     -35.053  32.749  11.480  1.00  0.00           C  
ATOM   1650  CD2 LEU A 308     -33.994  32.347   9.225  1.00  0.00           C  
ATOM   1651  C   LEU A 308     -31.568  30.061  12.878  1.00  0.00           C  
ATOM   1652  O   LEU A 308     -31.803  28.865  13.049  1.00  0.00           O  
ATOM   1653  N   LEU A 309     -30.322  30.587  12.914  1.00  0.00           N  
ATOM   1654  CA  LEU A 309     -29.094  29.814  13.122  1.00  0.00           C  
ATOM   1655  CB  LEU A 309     -27.884  30.776  13.042  1.00  0.00           C  
ATOM   1656  CG  LEU A 309     -27.271  30.921  11.633  1.00  0.00           C  
ATOM   1657  CD1 LEU A 309     -28.265  31.428  10.580  1.00  0.00           C  
ATOM   1658  CD2 LEU A 309     -26.035  31.833  11.677  1.00  0.00           C  
ATOM   1659  C   LEU A 309     -29.111  29.104  14.463  1.00  0.00           C  
ATOM   1660  O   LEU A 309     -28.690  27.956  14.527  1.00  0.00           O  
ATOM   1661  N   GLY A 310     -29.626  29.763  15.524  1.00  0.00           N  
ATOM   1662  CA  GLY A 310     -29.721  29.180  16.863  1.00  0.00           C  
ATOM   1663  C   GLY A 310     -30.657  27.977  16.901  1.00  0.00           C  
ATOM   1664  O   GLY A 310     -30.432  27.077  17.700  1.00  0.00           O  
ATOM   1665  N   VAL A 311     -31.694  27.960  16.043  1.00  0.00           N  
ATOM   1666  CA  VAL A 311     -32.657  26.860  15.968  1.00  0.00           C  
ATOM   1667  CB  VAL A 311     -33.975  27.392  15.353  1.00  0.00           C  
ATOM   1668  CG1 VAL A 311     -34.477  26.618  14.120  1.00  0.00           C  
ATOM   1669  CG2 VAL A 311     -35.040  27.462  16.458  1.00  0.00           C  
ATOM   1670  C   VAL A 311     -32.043  25.648  15.264  1.00  0.00           C  
ATOM   1671  O   VAL A 311     -32.102  24.539  15.795  1.00  0.00           O  
ATOM   1672  N   PHE A 312     -31.432  25.874  14.083  1.00  0.00           N  
ATOM   1673  CA  PHE A 312     -30.800  24.862  13.230  1.00  0.00           C  
ATOM   1674  CB  PHE A 312     -30.306  25.665  12.012  1.00  0.00           C  
ATOM   1675  CG  PHE A 312     -30.320  24.824  10.778  1.00  0.00           C  
ATOM   1676  CD1 PHE A 312     -31.524  24.611  10.127  1.00  0.00           C  
ATOM   1677  CD2 PHE A 312     -29.162  24.239  10.288  1.00  0.00           C  
ATOM   1678  CE1 PHE A 312     -31.585  23.795   9.014  1.00  0.00           C  
ATOM   1679  CE2 PHE A 312     -29.220  23.433   9.163  1.00  0.00           C  
ATOM   1680  CZ  PHE A 312     -30.432  23.201   8.528  1.00  0.00           C  
ATOM   1681  C   PHE A 312     -29.613  24.133  13.870  1.00  0.00           C  
ATOM   1682  O   PHE A 312     -29.335  23.000  13.490  1.00  0.00           O  
ATOM   1683  N   ALA A 313     -28.912  24.770  14.821  1.00  0.00           N  
ATOM   1684  CA  ALA A 313     -27.791  24.125  15.511  1.00  0.00           C  
ATOM   1685  CB  ALA A 313     -26.808  25.215  15.951  1.00  0.00           C  
ATOM   1686  C   ALA A 313     -28.341  23.380  16.746  1.00  0.00           C  
ATOM   1687  O   ALA A 313     -27.846  22.307  17.086  1.00  0.00           O  
ATOM   1688  N   VAL A 314     -29.420  23.917  17.353  1.00  0.00           N  
ATOM   1689  CA  VAL A 314     -30.123  23.346  18.507  1.00  0.00           C  
ATOM   1690  CB  VAL A 314     -31.051  24.409  19.138  1.00  0.00           C  
ATOM   1691  CG1 VAL A 314     -32.171  23.829  20.021  1.00  0.00           C  
ATOM   1692  CG2 VAL A 314     -30.220  25.400  19.970  1.00  0.00           C  
ATOM   1693  C   VAL A 314     -30.857  22.052  18.128  1.00  0.00           C  
ATOM   1694  O   VAL A 314     -31.014  21.162  18.969  1.00  0.00           O  
ATOM   1695  N   CYS A 315     -31.320  21.964  16.869  1.00  0.00           N  
ATOM   1696  CA  CYS A 315     -32.098  20.846  16.337  1.00  0.00           C  
ATOM   1697  CB  CYS A 315     -33.118  21.389  15.335  1.00  0.00           C  
ATOM   1698  SG  CYS A 315     -34.436  22.346  16.127  1.00  0.00           S  
ATOM   1699  C   CYS A 315     -31.293  19.715  15.684  1.00  0.00           C  
ATOM   1700  O   CYS A 315     -31.699  18.553  15.769  1.00  0.00           O  
ATOM   1701  N   TRP A 316     -30.197  20.060  14.989  1.00  0.00           N  
ATOM   1702  CA  TRP A 316     -29.386  19.103  14.247  1.00  0.00           C  
ATOM   1703  CB  TRP A 316     -28.859  19.921  13.068  1.00  0.00           C  
ATOM   1704  CG  TRP A 316     -29.254  19.420  11.719  1.00  0.00           C  
ATOM   1705  CD2 TRP A 316     -30.391  19.839  10.967  1.00  0.00           C  
ATOM   1706  CE2 TRP A 316     -30.323  19.237   9.715  1.00  0.00           C  
ATOM   1707  CE3 TRP A 316     -31.481  20.682  11.270  1.00  0.00           C  
ATOM   1708  CD1 TRP A 316     -28.551  18.531  10.962  1.00  0.00           C  
ATOM   1709  NE1 TRP A 316     -29.200  18.373   9.715  1.00  0.00           N  
ATOM   1710  CZ2 TRP A 316     -31.273  19.453   8.702  1.00  0.00           C  
ATOM   1711  CZ3 TRP A 316     -32.440  20.888  10.293  1.00  0.00           C  
ATOM   1712  CH2 TRP A 316     -32.337  20.284   9.013  1.00  0.00           C  
ATOM   1713  C   TRP A 316     -28.080  18.653  14.893  1.00  0.00           C  
ATOM   1714  O   TRP A 316     -27.716  17.494  14.686  1.00  0.00           O  
ATOM   1715  N   ALA A 317     -27.455  19.516  15.686  1.00  0.00           N  
ATOM   1716  CA  ALA A 317     -26.236  19.175  16.405  1.00  0.00           C  
ATOM   1717  CB  ALA A 317     -25.703  20.306  17.299  1.00  0.00           C  
ATOM   1718  C   ALA A 317     -26.309  17.813  17.094  1.00  0.00           C  
ATOM   1719  O   ALA A 317     -25.488  16.938  16.820  1.00  0.00           O  
ATOM   1720  N   PRO A 318     -27.277  17.630  17.990  1.00  0.00           N  
ATOM   1721  CD  PRO A 318     -28.386  18.537  18.316  1.00  0.00           C  
ATOM   1722  CA  PRO A 318     -27.336  16.374  18.760  1.00  0.00           C  
ATOM   1723  CB  PRO A 318     -28.668  16.462  19.521  1.00  0.00           C  
ATOM   1724  CG  PRO A 318     -28.953  17.963  19.614  1.00  0.00           C  
ATOM   1725  C   PRO A 318     -27.273  15.123  17.871  1.00  0.00           C  
ATOM   1726  O   PRO A 318     -26.612  14.158  18.246  1.00  0.00           O  
ATOM   1727  N   TYR A 319     -27.924  15.164  16.681  1.00  0.00           N  
ATOM   1728  CA  TYR A 319     -27.943  14.082  15.690  1.00  0.00           C  
ATOM   1729  CB  TYR A 319     -29.056  14.282  14.644  1.00  0.00           C  
ATOM   1730  CG  TYR A 319     -28.969  13.186  13.619  1.00  0.00           C  
ATOM   1731  CD1 TYR A 319     -29.244  11.869  13.994  1.00  0.00           C  
ATOM   1732  CE1 TYR A 319     -29.042  10.827  13.098  1.00  0.00           C  
ATOM   1733  CD2 TYR A 319     -28.513  13.463  12.328  1.00  0.00           C  
ATOM   1734  CE2 TYR A 319     -28.310  12.426  11.422  1.00  0.00           C  
ATOM   1735  CZ  TYR A 319     -28.567  11.114  11.818  1.00  0.00           C  
ATOM   1736  OH  TYR A 319     -28.346  10.082  10.939  1.00  0.00           O  
ATOM   1737  C   TYR A 319     -26.578  13.904  15.018  1.00  0.00           C  
ATOM   1738  O   TYR A 319     -26.167  12.768  14.788  1.00  0.00           O  
ATOM   1739  N   SER A 320     -25.904  15.019  14.670  1.00  0.00           N  
ATOM   1740  CA  SER A 320     -24.588  14.984  14.032  1.00  0.00           C  
ATOM   1741  CB  SER A 320     -24.288  16.353  13.400  1.00  0.00           C  
ATOM   1742  OG  SER A 320     -23.183  16.325  12.514  1.00  0.00           O  
ATOM   1743  C   SER A 320     -23.487  14.593  14.999  1.00  0.00           C  
ATOM   1744  O   SER A 320     -22.479  14.025  14.571  1.00  0.00           O  
ATOM   1745  N   LEU A 321     -23.681  14.873  16.303  1.00  0.00           N  
ATOM   1746  CA  LEU A 321     -22.732  14.465  17.335  1.00  0.00           C  
ATOM   1747  CB  LEU A 321     -22.899  15.374  18.568  1.00  0.00           C  
ATOM   1748  CG  LEU A 321     -22.036  16.652  18.524  1.00  0.00           C  
ATOM   1749  CD1 LEU A 321     -22.331  17.554  17.318  1.00  0.00           C  
ATOM   1750  CD2 LEU A 321     -22.186  17.443  19.830  1.00  0.00           C  
ATOM   1751  C   LEU A 321     -22.987  12.982  17.708  1.00  0.00           C  
ATOM   1752  O   LEU A 321     -22.116  12.335  18.288  1.00  0.00           O  
ATOM   1753  N   PHE A 322     -24.177  12.452  17.326  1.00  0.00           N  
ATOM   1754  CA  PHE A 322     -24.608  11.057  17.503  1.00  0.00           C  
ATOM   1755  CB  PHE A 322     -26.145  11.001  17.570  1.00  0.00           C  
ATOM   1756  CG  PHE A 322     -26.669   9.605  17.778  1.00  0.00           C  
ATOM   1757  CD1 PHE A 322     -26.616   9.011  19.035  1.00  0.00           C  
ATOM   1758  CD2 PHE A 322     -27.209   8.889  16.714  1.00  0.00           C  
ATOM   1759  CE1 PHE A 322     -27.091   7.720  19.226  1.00  0.00           C  
ATOM   1760  CE2 PHE A 322     -27.683   7.598  16.900  1.00  0.00           C  
ATOM   1761  CZ  PHE A 322     -27.622   7.012  18.156  1.00  0.00           C  
ATOM   1762  C   PHE A 322     -24.050  10.215  16.351  1.00  0.00           C  
ATOM   1763  O   PHE A 322     -23.913   8.998  16.478  1.00  0.00           O  
ATOM   1764  N   THR A 323     -23.739  10.881  15.226  1.00  0.00           N  
ATOM   1765  CA  THR A 323     -23.131  10.314  14.029  1.00  0.00           C  
ATOM   1766  CB  THR A 323     -23.423  11.212  12.806  1.00  0.00           C  
ATOM   1767  OG1 THR A 323     -24.811  11.531  12.726  1.00  0.00           O  
ATOM   1768  CG2 THR A 323     -22.979  10.555  11.491  1.00  0.00           C  
ATOM   1769  C   THR A 323     -21.639  10.166  14.287  1.00  0.00           C  
ATOM   1770  O   THR A 323     -21.019   9.233  13.785  1.00  0.00           O  
ATOM   1771  N   ILE A 324     -21.099  11.092  15.112  1.00  0.00           N  
ATOM   1772  CA  ILE A 324     -19.723  10.921  15.571  1.00  0.00           C  
ATOM   1773  CB  ILE A 324     -19.242  12.156  16.372  1.00  0.00           C  
ATOM   1774  CG2 ILE A 324     -17.832  11.945  16.956  1.00  0.00           C  
ATOM   1775  CG1 ILE A 324     -19.274  13.428  15.502  1.00  0.00           C  
ATOM   1776  CD1 ILE A 324     -18.929  14.712  16.269  1.00  0.00           C  
ATOM   1777  C   ILE A 324     -19.621   9.631  16.411  1.00  0.00           C  
ATOM   1778  O   ILE A 324     -18.736   8.816  16.200  1.00  0.00           O  
ATOM   1779  N   VAL A 325     -20.589   9.456  17.334  1.00  0.00           N  
ATOM   1780  CA  VAL A 325     -20.610   8.221  18.129  1.00  0.00           C  
ATOM   1781  CB  VAL A 325     -21.810   8.250  19.108  1.00  0.00           C  
ATOM   1782  CG1 VAL A 325     -21.966   6.937  19.897  1.00  0.00           C  
ATOM   1783  CG2 VAL A 325     -21.697   9.426  20.088  1.00  0.00           C  
ATOM   1784  C   VAL A 325     -20.665   6.968  17.220  1.00  0.00           C  
ATOM   1785  O   VAL A 325     -19.797   6.098  17.252  1.00  0.00           O  
ATOM   1786  N   LEU A 326     -21.738   6.947  16.404  1.00  0.00           N  
ATOM   1787  CA  LEU A 326     -22.020   5.777  15.572  1.00  0.00           C  
ATOM   1788  CB  LEU A 326     -23.358   6.002  14.832  1.00  0.00           C  
ATOM   1789  CG  LEU A 326     -24.561   5.302  15.494  1.00  0.00           C  
ATOM   1790  CD1 LEU A 326     -24.507   3.777  15.303  1.00  0.00           C  
ATOM   1791  CD2 LEU A 326     -24.720   5.669  16.976  1.00  0.00           C  
ATOM   1792  C   LEU A 326     -20.900   5.451  14.569  1.00  0.00           C  
ATOM   1793  O   LEU A 326     -20.812   4.331  14.084  1.00  0.00           O  
ATOM   1794  N   SER A 327     -20.050   6.456  14.270  1.00  0.00           N  
ATOM   1795  CA  SER A 327     -18.965   6.180  13.331  1.00  0.00           C  
ATOM   1796  CB  SER A 327     -18.270   7.494  12.932  1.00  0.00           C  
ATOM   1797  OG  SER A 327     -17.486   8.095  13.944  1.00  0.00           O  
ATOM   1798  C   SER A 327     -17.964   5.130  13.875  1.00  0.00           C  
ATOM   1799  O   SER A 327     -17.356   4.385  13.116  1.00  0.00           O  
ATOM   1800  N   PHE A 328     -17.836   5.109  15.222  1.00  0.00           N  
ATOM   1801  CA  PHE A 328     -16.862   4.218  15.856  1.00  0.00           C  
ATOM   1802  CB  PHE A 328     -16.280   4.901  17.108  1.00  0.00           C  
ATOM   1803  CG  PHE A 328     -15.597   6.199  16.776  1.00  0.00           C  
ATOM   1804  CD1 PHE A 328     -16.204   7.412  17.080  1.00  0.00           C  
ATOM   1805  CD2 PHE A 328     -14.350   6.205  16.159  1.00  0.00           C  
ATOM   1806  CE1 PHE A 328     -15.579   8.613  16.771  1.00  0.00           C  
ATOM   1807  CE2 PHE A 328     -13.720   7.403  15.850  1.00  0.00           C  
ATOM   1808  CZ  PHE A 328     -14.335   8.610  16.156  1.00  0.00           C  
ATOM   1809  C   PHE A 328     -17.509   2.877  16.243  1.00  0.00           C  
ATOM   1810  O   PHE A 328     -17.104   1.801  15.826  1.00  0.00           O  
ATOM   1811  N   TYR A 329     -18.497   3.031  17.135  1.00  0.00           N  
ATOM   1812  CA  TYR A 329     -19.113   1.901  17.872  1.00  0.00           C  
ATOM   1813  CB  TYR A 329     -19.225   2.331  19.346  1.00  0.00           C  
ATOM   1814  CG  TYR A 329     -19.962   1.349  20.223  1.00  0.00           C  
ATOM   1815  CD1 TYR A 329     -20.986   1.791  21.057  1.00  0.00           C  
ATOM   1816  CE1 TYR A 329     -21.663   0.905  21.885  1.00  0.00           C  
ATOM   1817  CD2 TYR A 329     -19.632  -0.004  20.225  1.00  0.00           C  
ATOM   1818  CE2 TYR A 329     -20.311  -0.894  21.046  1.00  0.00           C  
ATOM   1819  CZ  TYR A 329     -21.321  -0.440  21.880  1.00  0.00           C  
ATOM   1820  OH  TYR A 329     -21.976  -1.337  22.697  1.00  0.00           O  
ATOM   1821  C   TYR A 329     -20.554   1.626  17.267  1.00  0.00           C  
ATOM   1822  O   TYR A 329     -21.492   2.467  17.449  1.00  0.00           O  
ATOM   1823  N   SER A 330     -20.734   0.491  16.557  1.00  0.00           N  
ATOM   1824  CA  SER A 330     -22.028   0.212  15.848  1.00  0.00           C  
ATOM   1825  CB  SER A 330     -21.918   0.540  14.353  1.00  0.00           C  
ATOM   1826  OG  SER A 330     -23.202   0.421  13.741  1.00  0.00           O  
ATOM   1827  C   SER A 330     -22.374  -1.299  16.138  1.00  0.00           C  
ATOM   1828  O   SER A 330     -21.774  -1.959  16.977  1.00  0.00           O  
ATOM   1829  N   SER A 331     -23.361  -1.809  15.381  1.00  0.00           N  
ATOM   1830  CA  SER A 331     -23.686  -3.243  15.537  1.00  0.00           C  
ATOM   1831  CB  SER A 331     -22.514  -4.069  14.970  1.00  0.00           C  
ATOM   1832  OG  SER A 331     -22.013  -3.519  13.760  1.00  0.00           O  
ATOM   1833  C   SER A 331     -23.945  -3.651  16.997  1.00  0.00           C  
ATOM   1834  O   SER A 331     -23.663  -4.735  17.524  1.00  0.00           O  
ATOM   1835  N   ALA A 332     -24.526  -2.595  17.643  1.00  0.00           N  
ATOM   1836  CA  ALA A 332     -24.785  -2.416  19.023  1.00  0.00           C  
ATOM   1837  CB  ALA A 332     -23.481  -2.051  19.742  1.00  0.00           C  
ATOM   1838  C   ALA A 332     -25.818  -1.243  19.149  1.00  0.00           C  
ATOM   1839  O   ALA A 332     -26.852  -1.466  19.768  1.00  0.00           O  
ATOM   1840  N   THR A 333     -25.467   0.000  18.661  1.00  0.00           N  
ATOM   1841  CA  THR A 333     -26.087   1.255  19.140  1.00  0.00           C  
ATOM   1842  CB  THR A 333     -25.067   2.375  18.880  1.00  0.00           C  
ATOM   1843  OG1 THR A 333     -23.772   1.826  18.987  1.00  0.00           O  
ATOM   1844  CG2 THR A 333     -25.251   3.593  19.799  1.00  0.00           C  
ATOM   1845  C   THR A 333     -27.402   1.558  18.470  1.00  0.00           C  
ATOM   1846  O   THR A 333     -27.571   2.532  17.730  1.00  0.00           O  
ATOM   1847  N   GLY A 334     -28.434   0.692  18.746  1.00  0.00           N  
ATOM   1848  CA  GLY A 334     -29.825   0.932  18.305  1.00  0.00           C  
ATOM   1849  C   GLY A 334     -29.976   0.640  16.838  1.00  0.00           C  
ATOM   1850  O   GLY A 334     -29.919   1.538  15.989  1.00  0.00           O  
ATOM   1851  N   PRO A 335     -30.127  -0.679  16.442  1.00  0.00           N  
ATOM   1852  CD  PRO A 335     -30.131  -1.801  17.387  1.00  0.00           C  
ATOM   1853  CA  PRO A 335     -30.167  -1.146  15.034  1.00  0.00           C  
ATOM   1854  CB  PRO A 335     -30.336  -2.673  15.130  1.00  0.00           C  
ATOM   1855  CG  PRO A 335     -29.838  -3.034  16.529  1.00  0.00           C  
ATOM   1856  C   PRO A 335     -31.302  -0.508  14.287  1.00  0.00           C  
ATOM   1857  O   PRO A 335     -31.155   0.061  13.200  1.00  0.00           O  
ATOM   1858  N   LYS A 336     -32.445  -0.562  14.998  1.00  0.00           N  
ATOM   1859  CA  LYS A 336     -33.729   0.019  14.624  1.00  0.00           C  
ATOM   1860  CB  LYS A 336     -34.339  -0.767  13.435  1.00  0.00           C  
ATOM   1861  CG  LYS A 336     -34.117  -0.059  12.090  1.00  0.00           C  
ATOM   1862  CD  LYS A 336     -34.362  -0.926  10.847  1.00  0.00           C  
ATOM   1863  CE  LYS A 336     -33.258  -1.966  10.573  1.00  0.00           C  
ATOM   1864  NZ  LYS A 336     -33.325  -2.516   9.219  1.00  0.00           N1+
ATOM   1865  C   LYS A 336     -34.580  -0.129  15.891  1.00  0.00           C  
ATOM   1866  O   LYS A 336     -35.246  -1.139  16.080  1.00  0.00           O  
ATOM   1867  N   SER A 337     -34.446   0.858  16.805  1.00  0.00           N  
ATOM   1868  CA  SER A 337     -34.961   0.583  18.152  1.00  0.00           C  
ATOM   1869  CB  SER A 337     -33.960  -0.343  18.881  1.00  0.00           C  
ATOM   1870  OG  SER A 337     -33.479  -1.392  18.057  1.00  0.00           O  
ATOM   1871  C   SER A 337     -35.220   1.844  18.995  1.00  0.00           C  
ATOM   1872  O   SER A 337     -36.302   2.003  19.543  1.00  0.00           O  
ATOM   1873  N   VAL A 338     -34.185   2.703  19.112  1.00  0.00           N  
ATOM   1874  CA  VAL A 338     -34.261   3.797  20.089  1.00  0.00           C  
ATOM   1875  CB  VAL A 338     -33.193   3.575  21.190  1.00  0.00           C  
ATOM   1876  CG1 VAL A 338     -33.387   2.222  21.892  1.00  0.00           C  
ATOM   1877  CG2 VAL A 338     -33.179   4.700  22.240  1.00  0.00           C  
ATOM   1878  C   VAL A 338     -34.124   5.158  19.387  1.00  0.00           C  
ATOM   1879  O   VAL A 338     -35.097   5.861  19.151  1.00  0.00           O  
ATOM   1880  N   TRP A 339     -32.859   5.508  19.085  1.00  0.00           N  
ATOM   1881  CA  TRP A 339     -32.532   6.910  18.818  1.00  0.00           C  
ATOM   1882  CB  TRP A 339     -31.006   7.064  18.753  1.00  0.00           C  
ATOM   1883  CG  TRP A 339     -30.448   6.884  20.148  1.00  0.00           C  
ATOM   1884  CD2 TRP A 339     -29.861   5.702  20.730  1.00  0.00           C  
ATOM   1885  CE2 TRP A 339     -29.527   6.027  22.066  1.00  0.00           C  
ATOM   1886  CE3 TRP A 339     -29.605   4.446  20.247  1.00  0.00           C  
ATOM   1887  CD1 TRP A 339     -30.439   7.865  21.143  1.00  0.00           C  
ATOM   1888  NE1 TRP A 339     -29.895   7.350  22.270  1.00  0.00           N  
ATOM   1889  CZ2 TRP A 339     -28.953   5.087  22.879  1.00  0.00           C  
ATOM   1890  CZ3 TRP A 339     -29.023   3.486  21.074  1.00  0.00           C  
ATOM   1891  CH2 TRP A 339     -28.697   3.806  22.391  1.00  0.00           C  
ATOM   1892  C   TRP A 339     -33.190   7.482  17.548  1.00  0.00           C  
ATOM   1893  O   TRP A 339     -33.349   8.691  17.416  1.00  0.00           O  
ATOM   1894  N   TYR A 340     -33.611   6.550  16.667  1.00  0.00           N  
ATOM   1895  CA  TYR A 340     -34.334   6.908  15.446  1.00  0.00           C  
ATOM   1896  CB  TYR A 340     -34.557   5.624  14.606  1.00  0.00           C  
ATOM   1897  CG  TYR A 340     -35.787   4.799  14.923  1.00  0.00           C  
ATOM   1898  CD1 TYR A 340     -36.015   4.257  16.186  1.00  0.00           C  
ATOM   1899  CE1 TYR A 340     -37.160   3.511  16.441  1.00  0.00           C  
ATOM   1900  CD2 TYR A 340     -36.726   4.561  13.922  1.00  0.00           C  
ATOM   1901  CE2 TYR A 340     -37.869   3.812  14.170  1.00  0.00           C  
ATOM   1902  CZ  TYR A 340     -38.093   3.287  15.438  1.00  0.00           C  
ATOM   1903  OH  TYR A 340     -39.222   2.546  15.735  1.00  0.00           O  
ATOM   1904  C   TYR A 340     -35.670   7.634  15.745  1.00  0.00           C  
ATOM   1905  O   TYR A 340     -36.190   8.379  14.927  1.00  0.00           O  
ATOM   1906  N   ARG A 341     -36.177   7.377  16.968  1.00  0.00           N  
ATOM   1907  CA  ARG A 341     -37.391   8.029  17.441  1.00  0.00           C  
ATOM   1908  CB  ARG A 341     -37.774   7.378  18.786  1.00  0.00           C  
ATOM   1909  CG  ARG A 341     -39.023   7.974  19.460  1.00  0.00           C  
ATOM   1910  CD  ARG A 341     -39.178   7.500  20.910  1.00  0.00           C  
ATOM   1911  NE  ARG A 341     -40.086   8.400  21.615  1.00  0.00           N1+
ATOM   1912  CZ  ARG A 341     -40.261   8.365  22.955  1.00  0.00           C  
ATOM   1913  NH1 ARG A 341     -39.637   7.445  23.687  1.00  0.00           N  
ATOM   1914  NH2 ARG A 341     -41.056   9.260  23.535  1.00  0.00           N  
ATOM   1915  C   ARG A 341     -37.158   9.536  17.667  1.00  0.00           C  
ATOM   1916  O   ARG A 341     -38.060  10.347  17.509  1.00  0.00           O  
ATOM   1917  N   ILE A 342     -35.923   9.835  18.120  1.00  0.00           N  
ATOM   1918  CA  ILE A 342     -35.622  11.131  18.722  1.00  0.00           C  
ATOM   1919  CB  ILE A 342     -35.129  10.961  20.181  1.00  0.00           C  
ATOM   1920  CG2 ILE A 342     -34.118   9.816  20.370  1.00  0.00           C  
ATOM   1921  CG1 ILE A 342     -34.625  12.290  20.780  1.00  0.00           C  
ATOM   1922  CD1 ILE A 342     -34.461  12.255  22.304  1.00  0.00           C  
ATOM   1923  C   ILE A 342     -34.696  11.956  17.816  1.00  0.00           C  
ATOM   1924  O   ILE A 342     -35.120  12.970  17.271  1.00  0.00           O  
ATOM   1925  N   ALA A 343     -33.420  11.526  17.674  1.00  0.00           N  
ATOM   1926  CA  ALA A 343     -32.475  12.417  16.947  1.00  0.00           C  
ATOM   1927  CB  ALA A 343     -31.113  11.736  16.997  1.00  0.00           C  
ATOM   1928  C   ALA A 343     -32.927  12.805  15.559  1.00  0.00           C  
ATOM   1929  O   ALA A 343     -32.810  13.959  15.126  1.00  0.00           O  
ATOM   1930  N   PHE A 344     -33.501  11.815  14.786  1.00  0.00           N  
ATOM   1931  CA  PHE A 344     -34.083  12.049  13.434  1.00  0.00           C  
ATOM   1932  CB  PHE A 344     -34.691  10.742  12.898  1.00  0.00           C  
ATOM   1933  CG  PHE A 344     -33.687   9.698  12.484  1.00  0.00           C  
ATOM   1934  CD1 PHE A 344     -34.125   8.384  12.312  1.00  0.00           C  
ATOM   1935  CD2 PHE A 344     -32.355  10.012  12.209  1.00  0.00           C  
ATOM   1936  CE1 PHE A 344     -33.248   7.395  11.870  1.00  0.00           C  
ATOM   1937  CE2 PHE A 344     -31.477   9.024  11.766  1.00  0.00           C  
ATOM   1938  CZ  PHE A 344     -31.922   7.715  11.595  1.00  0.00           C  
ATOM   1939  C   PHE A 344     -35.218  13.059  13.425  1.00  0.00           C  
ATOM   1940  O   PHE A 344     -35.475  13.762  12.442  1.00  0.00           O  
ATOM   1941  N   TRP A 345     -35.989  13.151  14.562  1.00  0.00           N  
ATOM   1942  CA  TRP A 345     -37.249  13.876  14.710  1.00  0.00           C  
ATOM   1943  CB  TRP A 345     -38.209  13.090  15.629  1.00  0.00           C  
ATOM   1944  CG  TRP A 345     -38.979  12.064  14.822  1.00  0.00           C  
ATOM   1945  CD2 TRP A 345     -40.221  12.265  14.114  1.00  0.00           C  
ATOM   1946  CE2 TRP A 345     -40.538  11.039  13.483  1.00  0.00           C  
ATOM   1947  CE3 TRP A 345     -41.038  13.353  13.953  1.00  0.00           C  
ATOM   1948  CD1 TRP A 345     -38.606  10.738  14.596  1.00  0.00           C  
ATOM   1949  NE1 TRP A 345     -39.531  10.139  13.809  1.00  0.00           N  
ATOM   1950  CZ2 TRP A 345     -41.659  10.940  12.704  1.00  0.00           C  
ATOM   1951  CZ3 TRP A 345     -42.182  13.256  13.160  1.00  0.00           C  
ATOM   1952  CH2 TRP A 345     -42.488  12.047  12.533  1.00  0.00           C  
ATOM   1953  C   TRP A 345     -37.045  15.269  15.280  1.00  0.00           C  
ATOM   1954  O   TRP A 345     -37.869  16.147  15.028  1.00  0.00           O  
ATOM   1955  N   LEU A 346     -35.929  15.489  16.009  1.00  0.00           N  
ATOM   1956  CA  LEU A 346     -35.562  16.799  16.549  1.00  0.00           C  
ATOM   1957  CB  LEU A 346     -34.415  16.597  17.554  1.00  0.00           C  
ATOM   1958  CG  LEU A 346     -33.893  17.902  18.181  1.00  0.00           C  
ATOM   1959  CD1 LEU A 346     -34.965  18.639  18.994  1.00  0.00           C  
ATOM   1960  CD2 LEU A 346     -32.641  17.648  19.026  1.00  0.00           C  
ATOM   1961  C   LEU A 346     -35.118  17.706  15.403  1.00  0.00           C  
ATOM   1962  O   LEU A 346     -35.345  18.910  15.451  1.00  0.00           O  
ATOM   1963  N   GLN A 347     -34.516  17.105  14.381  1.00  0.00           N  
ATOM   1964  CA  GLN A 347     -34.120  17.787  13.157  1.00  0.00           C  
ATOM   1965  CB  GLN A 347     -33.230  16.757  12.438  1.00  0.00           C  
ATOM   1966  CG  GLN A 347     -32.727  17.203  11.061  1.00  0.00           C  
ATOM   1967  CD  GLN A 347     -31.695  16.229  10.561  1.00  0.00           C  
ATOM   1968  OE1 GLN A 347     -30.911  15.646  11.319  1.00  0.00           O  
ATOM   1969  NE2 GLN A 347     -31.619  16.000   9.206  1.00  0.00           N  
ATOM   1970  C   GLN A 347     -35.354  18.123  12.340  1.00  0.00           C  
ATOM   1971  O   GLN A 347     -35.385  19.145  11.654  1.00  0.00           O  
ATOM   1972  N   TRP A 348     -36.396  17.268  12.437  1.00  0.00           N  
ATOM   1973  CA  TRP A 348     -37.691  17.471  11.785  1.00  0.00           C  
ATOM   1974  CB  TRP A 348     -38.446  16.159  11.571  1.00  0.00           C  
ATOM   1975  CG  TRP A 348     -37.837  15.354  10.447  1.00  0.00           C  
ATOM   1976  CD2 TRP A 348     -37.875  13.933  10.352  1.00  0.00           C  
ATOM   1977  CE2 TRP A 348     -37.271  13.550   9.159  1.00  0.00           C  
ATOM   1978  CE3 TRP A 348     -38.390  12.943  11.209  1.00  0.00           C  
ATOM   1979  CD1 TRP A 348     -37.197  15.806   9.324  1.00  0.00           C  
ATOM   1980  NE1 TRP A 348     -36.843  14.713   8.485  1.00  0.00           N  
ATOM   1981  CZ2 TRP A 348     -37.155  12.216   8.745  1.00  0.00           C  
ATOM   1982  CZ3 TRP A 348     -38.282  11.620  10.821  1.00  0.00           C  
ATOM   1983  CH2 TRP A 348     -37.672  11.259   9.596  1.00  0.00           C  
ATOM   1984  C   TRP A 348     -38.489  18.523  12.580  1.00  0.00           C  
ATOM   1985  O   TRP A 348     -39.450  19.086  12.052  1.00  0.00           O  
ATOM   1986  N   PHE A 349     -38.087  18.779  13.849  1.00  0.00           N  
ATOM   1987  CA  PHE A 349     -38.684  19.784  14.734  1.00  0.00           C  
ATOM   1988  CB  PHE A 349     -38.266  19.557  16.193  1.00  0.00           C  
ATOM   1989  CG  PHE A 349     -39.282  20.144  17.137  1.00  0.00           C  
ATOM   1990  CD1 PHE A 349     -40.307  19.351  17.644  1.00  0.00           C  
ATOM   1991  CD2 PHE A 349     -39.223  21.486  17.501  1.00  0.00           C  
ATOM   1992  CE1 PHE A 349     -41.259  19.889  18.500  1.00  0.00           C  
ATOM   1993  CE2 PHE A 349     -40.175  22.027  18.356  1.00  0.00           C  
ATOM   1994  CZ  PHE A 349     -41.194  21.229  18.856  1.00  0.00           C  
ATOM   1995  C   PHE A 349     -38.312  21.201  14.238  1.00  0.00           C  
ATOM   1996  O   PHE A 349     -39.151  22.096  14.305  1.00  0.00           O  
ATOM   1997  N   ASN A 350     -37.085  21.375  13.674  1.00  0.00           N  
ATOM   1998  CA  ASN A 350     -36.590  22.632  13.086  1.00  0.00           C  
ATOM   1999  CB  ASN A 350     -35.175  22.387  12.524  1.00  0.00           C  
ATOM   2000  CG  ASN A 350     -34.641  23.550  11.669  1.00  0.00           C  
ATOM   2001  OD1 ASN A 350     -34.014  24.475  12.159  1.00  0.00           O  
ATOM   2002  ND2 ASN A 350     -34.933  23.452  10.363  1.00  0.00           N  
ATOM   2003  C   ASN A 350     -37.489  23.053  11.922  1.00  0.00           C  
ATOM   2004  O   ASN A 350     -37.694  24.246  11.714  1.00  0.00           O  
ATOM   2005  N   SER A 351     -38.008  22.073  11.167  1.00  0.00           N  
ATOM   2006  CA  SER A 351     -38.915  22.269  10.040  1.00  0.00           C  
ATOM   2007  CB  SER A 351     -39.091  21.017   9.159  1.00  0.00           C  
ATOM   2008  OG  SER A 351     -40.003  20.048   9.645  1.00  0.00           O  
ATOM   2009  C   SER A 351     -40.273  22.824  10.505  1.00  0.00           C  
ATOM   2010  O   SER A 351     -40.943  23.533   9.754  1.00  0.00           O  
ATOM   2011  N   PHE A 352     -40.658  22.491  11.744  1.00  0.00           N  
ATOM   2012  CA  PHE A 352     -41.891  22.941  12.390  1.00  0.00           C  
ATOM   2013  CB  PHE A 352     -42.227  21.837  13.428  1.00  0.00           C  
ATOM   2014  CG  PHE A 352     -43.450  22.013  14.298  1.00  0.00           C  
ATOM   2015  CD1 PHE A 352     -44.458  22.934  14.021  1.00  0.00           C  
ATOM   2016  CD2 PHE A 352     -43.570  21.217  15.436  1.00  0.00           C  
ATOM   2017  CE1 PHE A 352     -45.546  23.068  14.874  1.00  0.00           C  
ATOM   2018  CE2 PHE A 352     -44.665  21.336  16.282  1.00  0.00           C  
ATOM   2019  CZ  PHE A 352     -45.655  22.267  16.003  1.00  0.00           C  
ATOM   2020  C   PHE A 352     -41.613  24.257  13.145  1.00  0.00           C  
ATOM   2021  O   PHE A 352     -42.501  25.105  13.249  1.00  0.00           O  
ATOM   2022  N   VAL A 353     -40.375  24.406  13.672  1.00  0.00           N  
ATOM   2023  CA  VAL A 353     -39.924  25.549  14.470  1.00  0.00           C  
ATOM   2024  CB  VAL A 353     -38.767  25.142  15.417  1.00  0.00           C  
ATOM   2025  CG1 VAL A 353     -37.387  25.594  14.933  1.00  0.00           C  
ATOM   2026  CG2 VAL A 353     -39.003  25.653  16.847  1.00  0.00           C  
ATOM   2027  C   VAL A 353     -39.634  26.835  13.697  1.00  0.00           C  
ATOM   2028  O   VAL A 353     -39.978  27.904  14.193  1.00  0.00           O  
ATOM   2029  N   ASN A 354     -39.006  26.751  12.506  1.00  0.00           N  
ATOM   2030  CA  ASN A 354     -38.694  27.935  11.687  1.00  0.00           C  
ATOM   2031  CB  ASN A 354     -37.851  27.572  10.445  1.00  0.00           C  
ATOM   2032  CG  ASN A 354     -36.363  27.504  10.821  1.00  0.00           C  
ATOM   2033  OD1 ASN A 354     -35.683  28.512  10.969  1.00  0.00           O  
ATOM   2034  ND2 ASN A 354     -35.923  26.265  11.022  1.00  0.00           N  
ATOM   2035  C   ASN A 354     -39.901  28.811  11.293  1.00  0.00           C  
ATOM   2036  O   ASN A 354     -39.802  30.023  11.490  1.00  0.00           O  
ATOM   2037  N   PRO A 355     -41.106  28.343  10.791  1.00  0.00           N  
ATOM   2038  CD  PRO A 355     -41.321  26.955  10.387  1.00  0.00           C  
ATOM   2039  CA  PRO A 355     -42.291  29.216  10.510  1.00  0.00           C  
ATOM   2040  CB  PRO A 355     -43.362  28.223  10.024  1.00  0.00           C  
ATOM   2041  CG  PRO A 355     -42.572  27.020   9.507  1.00  0.00           C  
ATOM   2042  C   PRO A 355     -42.795  29.978  11.716  1.00  0.00           C  
ATOM   2043  O   PRO A 355     -43.496  30.993  11.626  1.00  0.00           O  
ATOM   2044  N   LEU A 356     -42.435  29.479  12.948  1.00  0.00           N  
ATOM   2045  CA  LEU A 356     -42.789  30.083  14.229  1.00  0.00           C  
ATOM   2046  CB  LEU A 356     -42.854  28.976  15.300  1.00  0.00           C  
ATOM   2047  CG  LEU A 356     -43.320  29.443  16.696  1.00  0.00           C  
ATOM   2048  CD1 LEU A 356     -44.167  28.359  17.378  1.00  0.00           C  
ATOM   2049  CD2 LEU A 356     -42.137  29.820  17.604  1.00  0.00           C  
ATOM   2050  C   LEU A 356     -41.786  31.200  14.591  1.00  0.00           C  
ATOM   2051  O   LEU A 356     -42.162  32.130  15.306  1.00  0.00           O  
ATOM   2052  N   LEU A 357     -40.524  31.111  14.102  1.00  0.00           N  
ATOM   2053  CA  LEU A 357     -39.453  32.084  14.376  1.00  0.00           C  
ATOM   2054  CB  LEU A 357     -38.093  31.577  13.875  1.00  0.00           C  
ATOM   2055  CG  LEU A 357     -37.596  30.301  14.557  1.00  0.00           C  
ATOM   2056  CD1 LEU A 357     -36.210  29.954  14.007  1.00  0.00           C  
ATOM   2057  CD2 LEU A 357     -37.595  30.415  16.090  1.00  0.00           C  
ATOM   2058  C   LEU A 357     -39.688  33.437  13.703  1.00  0.00           C  
ATOM   2059  O   LEU A 357     -39.577  34.459  14.381  1.00  0.00           O  
ATOM   2060  N   TYR A 358     -40.018  33.441  12.389  1.00  0.00           N  
ATOM   2061  CA  TYR A 358     -40.249  34.652  11.575  1.00  0.00           C  
ATOM   2062  CB  TYR A 358     -40.886  34.271  10.217  1.00  0.00           C  
ATOM   2063  CG  TYR A 358     -40.077  33.356   9.325  1.00  0.00           C  
ATOM   2064  CD1 TYR A 358     -38.737  33.603   9.039  1.00  0.00           C  
ATOM   2065  CE1 TYR A 358     -38.038  32.781   8.160  1.00  0.00           C  
ATOM   2066  CD2 TYR A 358     -40.688  32.254   8.729  1.00  0.00           C  
ATOM   2067  CE2 TYR A 358     -39.990  31.428   7.853  1.00  0.00           C  
ATOM   2068  CZ  TYR A 358     -38.661  31.700   7.553  1.00  0.00           C  
ATOM   2069  OH  TYR A 358     -37.945  30.919   6.662  1.00  0.00           O  
ATOM   2070  C   TYR A 358     -41.114  35.773  12.213  1.00  0.00           C  
ATOM   2071  O   TYR A 358     -40.625  36.903  12.256  1.00  0.00           O  
ATOM   2072  N   PRO A 359     -42.340  35.522  12.761  1.00  0.00           N  
ATOM   2073  CD  PRO A 359     -43.055  34.245  12.783  1.00  0.00           C  
ATOM   2074  CA  PRO A 359     -43.100  36.632  13.377  1.00  0.00           C  
ATOM   2075  CB  PRO A 359     -44.477  35.999  13.641  1.00  0.00           C  
ATOM   2076  CG  PRO A 359     -44.206  34.495  13.755  1.00  0.00           C  
ATOM   2077  C   PRO A 359     -42.522  37.198  14.686  1.00  0.00           C  
ATOM   2078  O   PRO A 359     -42.701  38.391  14.946  1.00  0.00           O  
ATOM   2079  N   LEU A 360     -41.833  36.354  15.500  1.00  0.00           N  
ATOM   2080  CA  LEU A 360     -41.224  36.736  16.788  1.00  0.00           C  
ATOM   2081  CB  LEU A 360     -40.592  35.461  17.386  1.00  0.00           C  
ATOM   2082  CG  LEU A 360     -40.045  35.599  18.825  1.00  0.00           C  
ATOM   2083  CD1 LEU A 360     -40.194  34.274  19.586  1.00  0.00           C  
ATOM   2084  CD2 LEU A 360     -38.572  36.042  18.860  1.00  0.00           C  
ATOM   2085  C   LEU A 360     -40.177  37.843  16.636  1.00  0.00           C  
ATOM   2086  O   LEU A 360     -40.045  38.685  17.530  1.00  0.00           O  
ATOM   2087  N   CYS A 361     -39.430  37.823  15.517  1.00  0.00           N  
ATOM   2088  CA  CYS A 361     -38.357  38.773  15.231  1.00  0.00           C  
ATOM   2089  CB  CYS A 361     -37.128  37.978  14.778  1.00  0.00           C  
ATOM   2090  SG  CYS A 361     -36.657  36.742  16.017  1.00  0.00           S  
ATOM   2091  C   CYS A 361     -38.746  39.815  14.192  1.00  0.00           C  
ATOM   2092  O   CYS A 361     -38.397  40.984  14.356  1.00  0.00           O  
ATOM   2093  N   HIS A 362     -39.456  39.400  13.126  1.00  0.00           N  
ATOM   2094  CA  HIS A 362     -39.888  40.301  12.057  1.00  0.00           C  
ATOM   2095  CB  HIS A 362     -40.019  39.550  10.727  1.00  0.00           C  
ATOM   2096  CG  HIS A 362     -38.704  38.985  10.265  1.00  0.00           C  
ATOM   2097  CD2 HIS A 362     -38.488  37.704   9.740  1.00  0.00           C  
ATOM   2098  ND1 HIS A 362     -37.533  39.659  10.264  1.00  0.00           N  
ATOM   2099  CE1 HIS A 362     -36.632  38.809   9.749  1.00  0.00           C  
ATOM   2100  NE2 HIS A 362     -37.181  37.628   9.425  1.00  0.00           N  
ATOM   2101  C   HIS A 362     -41.278  40.893  12.331  1.00  0.00           C  
ATOM   2102  O   HIS A 362     -42.218  40.155  12.638  1.00  0.00           O  
ATOM   2103  N   LYS A 363     -41.386  42.235  12.219  1.00  0.00           N  
ATOM   2104  CA  LYS A 363     -42.602  43.025  12.448  1.00  0.00           C  
ATOM   2105  CB  LYS A 363     -42.292  44.509  12.745  1.00  0.00           C  
ATOM   2106  CG  LYS A 363     -41.998  45.421  11.539  1.00  0.00           C  
ATOM   2107  CD  LYS A 363     -41.835  46.891  11.961  1.00  0.00           C  
ATOM   2108  CE  LYS A 363     -41.836  47.854  10.764  1.00  0.00           C  
ATOM   2109  NZ  LYS A 363     -41.771  49.264  11.159  1.00  0.00           N1+
ATOM   2110  C   LYS A 363     -43.644  42.827  11.340  1.00  0.00           C  
ATOM   2111  O   LYS A 363     -44.805  42.551  11.649  1.00  0.00           O  
ATOM   2112  N   ARG A 364     -43.227  42.968  10.058  1.00  0.00           N  
ATOM   2113  CA  ARG A 364     -44.073  42.813   8.866  1.00  0.00           C  
ATOM   2114  CB  ARG A 364     -43.186  42.991   7.595  1.00  0.00           C  
ATOM   2115  CG  ARG A 364     -42.316  41.773   7.176  1.00  0.00           C  
ATOM   2116  CD  ARG A 364     -41.429  42.009   5.934  1.00  0.00           C  
ATOM   2117  NE  ARG A 364     -40.967  40.750   5.323  1.00  0.00           N1+
ATOM   2118  CZ  ARG A 364     -40.016  39.948   5.862  1.00  0.00           C  
ATOM   2119  NH1 ARG A 364     -39.473  40.281   7.030  1.00  0.00           N  
ATOM   2120  NH2 ARG A 364     -39.614  38.834   5.245  1.00  0.00           N  
ATOM   2121  C   ARG A 364     -44.730  41.434   8.783  1.00  0.00           C  
ATOM   2122  O   ARG A 364     -45.845  41.323   8.271  1.00  0.00           O  
ATOM   2123  N   PHE A 365     -44.034  40.390   9.279  1.00  0.00           N  
ATOM   2124  CA  PHE A 365     -44.519  39.010   9.322  1.00  0.00           C  
ATOM   2125  CB  PHE A 365     -43.341  38.025   9.477  1.00  0.00           C  
ATOM   2126  CG  PHE A 365     -43.172  37.158   8.255  1.00  0.00           C  
ATOM   2127  CD1 PHE A 365     -43.470  35.800   8.293  1.00  0.00           C  
ATOM   2128  CD2 PHE A 365     -42.721  37.712   7.061  1.00  0.00           C  
ATOM   2129  CE1 PHE A 365     -43.316  35.010   7.159  1.00  0.00           C  
ATOM   2130  CE2 PHE A 365     -42.574  36.928   5.924  1.00  0.00           C  
ATOM   2131  CZ  PHE A 365     -42.871  35.574   5.973  1.00  0.00           C  
ATOM   2132  C   PHE A 365     -45.557  38.848  10.433  1.00  0.00           C  
ATOM   2133  O   PHE A 365     -46.591  38.225  10.201  1.00  0.00           O  
ATOM   2134  N   GLN A 366     -45.275  39.418  11.631  1.00  0.00           N  
ATOM   2135  CA  GLN A 366     -46.112  39.384  12.839  1.00  0.00           C  
ATOM   2136  CB  GLN A 366     -45.398  40.254  13.890  1.00  0.00           C  
ATOM   2137  CG  GLN A 366     -45.895  40.048  15.327  1.00  0.00           C  
ATOM   2138  CD  GLN A 366     -45.073  40.902  16.307  1.00  0.00           C  
ATOM   2139  OE1 GLN A 366     -44.408  41.861  15.937  1.00  0.00           O  
ATOM   2140  NE2 GLN A 366     -45.160  40.505  17.582  1.00  0.00           N  
ATOM   2141  C   GLN A 366     -47.553  39.874  12.602  1.00  0.00           C  
ATOM   2142  O   GLN A 366     -48.492  39.291  13.151  1.00  0.00           O  
ATOM   2143  N   LYS A 367     -47.717  40.934  11.783  1.00  0.00           N  
ATOM   2144  CA  LYS A 367     -49.008  41.546  11.433  1.00  0.00           C  
ATOM   2145  CB  LYS A 367     -48.828  43.021  11.039  1.00  0.00           C  
ATOM   2146  CG  LYS A 367     -50.189  43.722  10.885  1.00  0.00           C  
ATOM   2147  CD  LYS A 367     -50.092  45.222  10.603  1.00  0.00           C  
ATOM   2148  CE  LYS A 367     -51.492  45.840  10.480  1.00  0.00           C  
ATOM   2149  NZ  LYS A 367     -51.472  47.278  10.218  1.00  0.00           N1+
ATOM   2150  C   LYS A 367     -49.724  40.772  10.316  1.00  0.00           C  
ATOM   2151  O   LYS A 367     -50.944  40.615  10.383  1.00  0.00           O  
ATOM   2152  N   ALA A 368     -48.964  40.297   9.297  1.00  0.00           N  
ATOM   2153  CA  ALA A 368     -49.476  39.519   8.157  1.00  0.00           C  
ATOM   2154  CB  ALA A 368     -48.338  39.333   7.145  1.00  0.00           C  
ATOM   2155  C   ALA A 368     -49.989  38.142   8.630  1.00  0.00           C  
ATOM   2156  O   ALA A 368     -50.979  37.641   8.093  1.00  0.00           O  
ATOM   2157  N   PHE A 369     -49.326  37.557   9.652  1.00  0.00           N  
ATOM   2158  CA  PHE A 369     -49.703  36.276  10.260  1.00  0.00           C  
ATOM   2159  CB  PHE A 369     -48.539  35.783  11.152  1.00  0.00           C  
ATOM   2160  CG  PHE A 369     -47.578  34.844  10.462  1.00  0.00           C  
ATOM   2161  CD1 PHE A 369     -47.323  34.910   9.093  1.00  0.00           C  
ATOM   2162  CD2 PHE A 369     -46.934  33.867  11.215  1.00  0.00           C  
ATOM   2163  CE1 PHE A 369     -46.466  33.999   8.489  1.00  0.00           C  
ATOM   2164  CE2 PHE A 369     -46.066  32.964  10.618  1.00  0.00           C  
ATOM   2165  CZ  PHE A 369     -45.838  33.025   9.253  1.00  0.00           C  
ATOM   2166  C   PHE A 369     -50.952  36.440  11.134  1.00  0.00           C  
ATOM   2167  O   PHE A 369     -51.784  35.533  11.174  1.00  0.00           O  
ATOM   2168  N   LEU A 370     -51.084  37.598  11.820  1.00  0.00           N  
ATOM   2169  CA  LEU A 370     -52.234  37.931  12.667  1.00  0.00           C  
ATOM   2170  CB  LEU A 370     -51.849  39.161  13.510  1.00  0.00           C  
ATOM   2171  CG  LEU A 370     -52.961  39.687  14.438  1.00  0.00           C  
ATOM   2172  CD1 LEU A 370     -53.441  38.617  15.428  1.00  0.00           C  
ATOM   2173  CD2 LEU A 370     -52.486  40.939  15.184  1.00  0.00           C  
ATOM   2174  C   LEU A 370     -53.471  38.235  11.805  1.00  0.00           C  
ATOM   2175  O   LEU A 370     -54.559  37.741  12.108  1.00  0.00           O  
ATOM   2176  N   LYS A 371     -53.297  39.041  10.731  1.00  0.00           N  
ATOM   2177  CA  LYS A 371     -54.366  39.448   9.814  1.00  0.00           C  
ATOM   2178  CB  LYS A 371     -53.880  40.594   8.883  1.00  0.00           C  
ATOM   2179  CG  LYS A 371     -53.141  40.147   7.605  1.00  0.00           C  
ATOM   2180  CD  LYS A 371     -52.498  41.283   6.785  1.00  0.00           C  
ATOM   2181  CE  LYS A 371     -51.905  40.764   5.456  1.00  0.00           C  
ATOM   2182  NZ  LYS A 371     -51.211  41.765   4.635  1.00  0.00           N1+
ATOM   2183  C   LYS A 371     -54.966  38.301   9.001  1.00  0.00           C  
ATOM   2184  O   LYS A 371     -56.164  38.335   8.715  1.00  0.00           O  
ATOM   2185  N   ILE A 372     -54.145  37.287   8.647  1.00  0.00           N  
ATOM   2186  CA  ILE A 372     -54.574  36.101   7.888  1.00  0.00           C  
ATOM   2187  CB  ILE A 372     -53.378  35.475   7.134  1.00  0.00           C  
ATOM   2188  CG2 ILE A 372     -52.342  34.860   8.082  1.00  0.00           C  
ATOM   2189  CG1 ILE A 372     -53.835  34.454   6.074  1.00  0.00           C  
ATOM   2190  CD1 ILE A 372     -52.728  34.065   5.086  1.00  0.00           C  
ATOM   2191  C   ILE A 372     -55.328  35.073   8.760  1.00  0.00           C  
ATOM   2192  O   ILE A 372     -56.171  34.336   8.237  1.00  0.00           O  
ATOM   2193  N   PHE A 373     -55.017  35.025  10.082  1.00  0.00           N  
ATOM   2194  CA  PHE A 373     -55.664  34.122  11.042  1.00  0.00           C  
ATOM   2195  CB  PHE A 373     -54.862  34.053  12.361  1.00  0.00           C  
ATOM   2196  CG  PHE A 373     -53.525  33.343  12.296  1.00  0.00           C  
ATOM   2197  CD1 PHE A 373     -53.217  32.393  11.319  1.00  0.00           C  
ATOM   2198  CD2 PHE A 373     -52.559  33.634  13.258  1.00  0.00           C  
ATOM   2199  CE1 PHE A 373     -51.981  31.763  11.305  1.00  0.00           C  
ATOM   2200  CE2 PHE A 373     -51.318  33.008  13.242  1.00  0.00           C  
ATOM   2201  CZ  PHE A 373     -51.026  32.071  12.263  1.00  0.00           C  
ATOM   2202  C   PHE A 373     -57.091  34.588  11.348  1.00  0.00           C  
ATOM   2203  O   PHE A 373     -58.004  33.757  11.430  1.00  0.00           O  
ATOM   2204  N   CYS A 374     -57.284  35.919  11.465  1.00  0.00           N  
ATOM   2205  CA  CYS A 374     -58.585  36.542  11.721  1.00  0.00           C  
ATOM   2206  CB  CYS A 374     -58.364  37.781  12.596  1.00  0.00           C  
ATOM   2207  SG  CYS A 374     -57.540  37.381  14.160  1.00  0.00           S  
ATOM   2208  C   CYS A 374     -59.269  36.946  10.397  1.00  0.00           C  
ATOM   2209  O   CYS A 374     -60.165  37.794  10.374  1.00  0.00           O  
ATOM   2210  N   ILE A 375     -58.845  36.267   9.302  1.00  0.00           N  
ATOM   2211  CA  ILE A 375     -59.296  36.353   7.906  1.00  0.00           C  
ATOM   2212  CB  ILE A 375     -60.611  35.544   7.757  1.00  0.00           C  
ATOM   2213  CG2 ILE A 375     -61.086  35.498   6.291  1.00  0.00           C  
ATOM   2214  CG1 ILE A 375     -60.455  34.113   8.322  1.00  0.00           C  
ATOM   2215  CD1 ILE A 375     -61.744  33.282   8.274  1.00  0.00           C  
ATOM   2216  C   ILE A 375     -59.449  37.785   7.363  1.00  0.00           C  
ATOM   2217  O   ILE A 375     -58.512  38.330   6.778  1.00  0.00           O  
TER    2218      ILE A 375 
HETATM 2219  C1  cpd    16     -28.241  14.340   8.385  1.00  0.00           C  
HETATM 2220  N2  cpd    16     -29.497  13.755   8.501  1.00  0.00           N  
HETATM 2221  C3  cpd    16     -29.637  12.461   8.341  1.00  0.00           C  
HETATM 2222  N4  cpd    16     -30.923  11.910   8.419  1.00  0.00           N  
HETATM 2223  C5  cpd    16     -31.339  10.882   7.435  1.00  0.00           C  
HETATM 2224  N7  cpd    16     -33.576  10.778   8.552  1.00  0.00           N  
HETATM 2225  C24 cpd    16     -32.397   9.966   8.060  1.00  0.00           C  
HETATM 2226  C8  cpd    16     -34.563   9.842   9.193  1.00  0.00           C  
HETATM 2227  C9  cpd    16     -33.146  11.866   9.517  1.00  0.00           C  
HETATM 2228  C10 cpd    16     -32.042  12.750   8.903  1.00  0.00           C  
HETATM 2229  C11 cpd    16     -28.500  11.582   8.113  1.00  0.00           C  
HETATM 2230  N12 cpd    16     -27.258  12.173   7.982  1.00  0.00           N  
HETATM 2231  C13 cpd    16     -27.087  13.586   8.110  1.00  0.00           C  
HETATM 2232  C14 cpd    16     -25.827  14.146   7.957  1.00  0.00           C  
HETATM 2233  C15 cpd    16     -25.768  15.523   8.092  1.00  0.00           C  
HETATM 2234 CL16 cpd    16     -24.241  16.347   7.867  1.00  0.00          CL  
HETATM 2235  C17 cpd    16     -26.337  11.149   7.827  1.00  0.00           C  
HETATM 2236  N18 cpd    16     -26.991  10.019   7.864  1.00  0.00           N  
HETATM 2237  N19 cpd    16     -28.321  10.278   8.046  1.00  0.00           N  
HETATM 2238  N20 cpd    16     -28.127  15.674   8.529  1.00  0.00           N  
HETATM 2239  C21 cpd    16     -26.937  16.249   8.387  1.00  0.00           C  
TER    2240      cpd    16 
CONECT 2219 2220 2231 2238
CONECT 2220 2219 2221
CONECT 2221 2220 2222 2229
CONECT 2222 2221 2223 2228
CONECT 2223 2222 2225
CONECT 2224 2225 2226 2227
CONECT 2225 2223 2224
CONECT 2226 2224
CONECT 2227 2224 2228
CONECT 2228 2222 2227
CONECT 2229 2221 2230 2237
CONECT 2230 2229 2231 2235
CONECT 2231 2219 2230 2232
CONECT 2232 2231 2233
CONECT 2233 2232 2234 2239
CONECT 2234 2233
CONECT 2235 2230 2236
CONECT 2236 2235 2237
CONECT 2237 2229 2236
CONECT 2238 2219 2239
CONECT 2239 2233 2238
END
